1 **Androglobin, a chimeric mammalian globin, is required for male fertility**

2

3 Anna Keppner<sup>1</sup>, Miguel Correia<sup>1</sup>, Sara Santambrogio<sup>2</sup>, Teng Wei Koay<sup>1</sup>, Darko Maric<sup>1</sup>,

4 Carina Osterhof<sup>3</sup>, Denise V Winter<sup>4</sup>, Angèle Clerc<sup>1</sup>, Michael Stumpe<sup>5</sup>, Frédéric

5 Chalmel<sup>6</sup>, Sylvia Dewilde<sup>7</sup>, Alex Odermatt<sup>4</sup>, Dieter Kressler<sup>5</sup>, Thomas Hankeln<sup>3</sup>, Roland

6 H. Wenger<sup>2</sup>, David Hoogewijs<sup>1\*</sup>

7

8 <sup>1</sup> Section of Medicine, Department of Endocrinology, Metabolism and Cardiovascular

9 system (EMC), University of Fribourg, Switzerland; <sup>2</sup> Institute of Physiology, University

10 of Zurich, Switzerland; <sup>3</sup> Institute for Organismic and Molecular Evolutionary Biology,

11 University of Mainz, Germany; <sup>4</sup> Department of Pharmaceutical Sciences, University of

12 Basel, Switzerland, <sup>5</sup> Department of Biology, University of Fribourg, Switzerland, <sup>6</sup>

13 University of Rennes, Inserm, EHESP, Irset (Institut de recherche en santé,

14 environnement et travail) - UMR\_S 1085, France, <sup>7</sup> Department of Biomedical Sciences,

15 University of Antwerp, Belgium

16

17 \*Corresponding author: David Hoogewijs

18 Email: [david.hoogewijs@unifr.ch](mailto:david.hoogewijs@unifr.ch)

19 **Abstract**

20 Spermatogenesis is a highly specialised process, involving multiple dedicated pathways  
21 and regulatory check-points. Defects ultimately lead to male sub-fertility or sterility, and  
22 numerous aspects of mammalian sperm formation remain unknown. The predominant  
23 expression of the latest globin family member, androglobin (Adgb) in mammalian testis  
24 tissue prompted us to assess its physiological function in spermatogenesis. Adgb  
25 knockout mice display male infertility, reduced testis weight, impaired maturation of  
26 elongating spermatids, abnormal sperm shape and ultrastructural defects in microtubule  
27 and mitochondrial organisation. Epididymal sperm from Adgb knockout animals display  
28 multiple flagellar malformations including coiled, bifide or shortened flagella, and  
29 erratic acrosomal development. Following immunoprecipitation and mass spectrometry,  
30 we could identify septin 10 (Sept10) as interactor of Adgb. The Sept10-Adgb interaction  
31 was confirmed both *in vivo* using testis lysates, and *in vitro* by reciprocal co-  
32 immunoprecipitation experiments. Furthermore, absence of Adgb leads to  
33 mislocalisation of Sept10 in sperm, indicating defective manchette and sperm annulus  
34 formation. Finally, *in vitro* data suggest that Adgb contributes to Sept10 proteolysis in a  
35 calmodulin (CaM)-dependent manner. Collectively, our results provide evidence that  
36 Adgb is essential for murine spermatogenesis and further suggest that interdependence  
37 between Adgb and Sept10 is required for sperm head shaping via the manchette and  
38 proper flagellum formation.

## 39 **Introduction**

40 Spermatogenesis is a complex and tightly regulated process, involving germ cell  
41 differentiation, haploid cell formation and sperm maturation and elongation (Hermo et  
42 al. 2010a, b, c, d, e, Neto et al. 2016). In a first proliferative step, germ cells will either  
43 self-renew to maintain the pool of active progenitor cells, or commit to become  
44 spermatogonia. Spermatogonia then undergo mitosis, thereby generating primary  
45 spermatocytes, that will go through a first round of meiosis, forming secondary  
46 spermatocytes, and a second round of meiosis to generate spermatids (Mecklenburg and  
47 Hermann 2016). At this stage, DNA replication is arrested and all the genetic material  
48 (RNA) required for spermatid maturation and further development is stored in a  
49 specialized compartment known as the chromatoid body (Peruquetti 2015). During this  
50 maturation process, known as spermiogenesis, the spermatids undergo deep  
51 morphological changes, including the formation of the acrosome (the sperm head) from  
52 the Golgi apparatus before migration of the latter to the cytoplasmic droplet (Khawar,  
53 Gao, and Li 2019), condensation of the nucleus, and the sperm flagellum formation from  
54 the centriole, around which mitochondria will migrate to form the midpiece, the sperm  
55 annulus and the mobile tail (Hermo et al. 2010a, b, c, d, e). These different steps  
56 ultimately lead to male fertility and are governed by numerous factors, including  
57 hormonal, translational, post-translational and epigenetic events. Dysfunctions in any of  
58 these regulatory processes will have consequences on sperm quality, sperm motility, or  
59 fecundation capacity (Neto et al. 2016). However, numerous physiological and  
60 pathological aspects of spermatogenesis are still not fully understood, and about 30% of  
61 sperm abnormalities are still idiopathic (Fainberg and Kashanian 2019). Moreover,  
62 several studies suggest that semen quality and male fertility have declined in Western  
63 countries over the past 50 years, further urging the need of a better global understanding

64 of male gamete formation (Levine et al. 2017). This led in recent years to the  
65 identification of a growing number of genes implicated in spermatogenesis and  
66 appearing causative for partial or complete male infertility upon mutation (Bracke et al.  
67 2018a).

68 Globins are small globular metallo-proteins, which have the capacity to reversibly bind  
69 gaseous ligands via a typical 8 alpha-helical structure in which a heme prosthetic group  
70 can be embedded. In mammals, five globin types exist: the well-established hemoglobin  
71 (Hb) and myoglobin (Mb), neuroglobin (Ngb) in neuronal cells, cytoglobin (Cygb)  
72 ubiquitously expressed in fibroblasts, and the more recently identified androglobin  
73 (Adgb), predominantly expressed in mammalian testis tissue (Keppner et al. 2020).

74 Adgb is a chimeric protein containing an N-terminal calpain-like cysteine protease  
75 domain, a central permuted functional globin domain (Bracke, Hoogewijs, and Dewilde  
76 2018b), interrupted by a potential calmodulin (CaM)-binding IQ motif and a large 700  
77 amino acid long C-terminal tail of unknown identity (Hoogewijs et al. 2012). Decreased  
78 mRNA expression levels in infertile versus fertile men (Platts et al. 2007) suggest a  
79 potential role of Adgb in spermatogenesis. Gene regulation and expression studies  
80 further suggest an association of Adgb with ciliogenesis including flagellum formation  
81 (Koay et al. 2021). However, the *in vivo* function of Adgb remains unexplored. In this  
82 study we investigated the physiological function of Adgb during murine spermatogenesis  
83 by generating and analyzing Adgb knockout mice. We show that Adgb is mainly  
84 expressed in late steps of spermiogenesis, that it localizes to the acrosome, the sperm  
85 flagellum, the annulus and the midpiece, and that it is crucial for male fertility and sperm  
86 formation. Furthermore, we demonstrate that Adgb interacts with septin10 (Sept10), and  
87 that co-localization occurs from the first steps of acrosome formation onwards within the

- 88 sperm neck and annulus. Finally, *in vitro* data suggest that Adgb contributes to Sept10  
89 proteolysis in a CaM-dependent manner.

90 **Results**

91 *Adgb* knockout mice display male infertility

92 A gene-trap strategy, provided by the Knockout Mouse Project (KOMP)(Skarnes et al.  
93 2011), was applied to target exons 13 and 14 of the *Adgb* gene (**Fig S1**). The correct  
94 targeting of ES cells was verified first by long-range PCR (**Fig. S1**), and second by  
95 Southern blotting (**Fig. S1**). The targeted *Adgb*<sup>tm1a(KOMP)Wtsi</sup> allele (*Adgb* tm1a mice),  
96 generated on a C57BL/6N background, displays a gene-trap DNA cassette, which was  
97 inserted into the twelfth intron of the *Adgb* gene. The gene trap consists of a splice  
98 acceptor site, an internal ribosome entry site, a  $\beta$ -galactosidase reporter sequence, and a  
99 neomycin resistance sequence. Breeding of *Adgb* tm1a mice with ubiquitously expressed  
100 CMV Cre-deleter mice allowed generation of mice deficient for exons 13 and 14 but still  
101 expressing the  $\beta$ -galactosidase reporter (*Adgb* tm1b mice) (**Fig. S1**). Furthermore,  
102 mating of *Adgb* tm1a mice with Flp-deleter mice enabled the generation of conditional  
103 floxed mice (*Adgb* tm1c) (**Fig. S1**). These mice were further crossed with CMV Cre-  
104 deleter mice to generate the full knockout animals (*Adgb* tm1d) (**Fig. S1**), that were used  
105 for all downstream applications if not otherwise stated. Genotyping was performed by  
106 regular PCR (**Fig. S1**), and revealed no significant differences in the Mendelian  
107 distribution of offspring for *Adgb* tm1d animals following interbreeding of heterozygous  
108 parents (380 pups: +/+, n= 101; +/-, n= 168; -/-, n=111;  $X^2 = 5.62$ ,  $p > 0.05$ , ns). The  
109 genetic ablation of *Adgb* expression was further verified by RT-qPCR (**Fig. 1A**) and  
110 immunoblotting (**Fig. 1B,C**). While female knockout mice displayed no fertility issues,  
111 male knockout mice never generated offspring, indicative for infertility. Full penetrance  
112 male infertility was also observed in homozygous tm1a and tm1b male mice, whereas  
113 homozygous tm1c animals showed normal fertility (data not shown). Accordingly, the  
114 testis weight was significantly reduced in knockouts (**Fig. 1D**) associated with decreased

115 serum testosterone levels (**Fig. 1E**). Stage-specific histological examination of  
116 seminiferous tubules of control animals revealed normal architecture, normal  
117 spermatogenic maturation steps, and the presence of mature sperm with flagella  
118 extending into the lumen (**Fig. 1F**). In contrast, in knockout animals, despite the  
119 presence of meiotic events (stages X-XII, **Fig. 1F**), no flagella could be observed during  
120 the spermiation stage (stage VII-VIII, **Fig. 1F**). The absence of mature sperm was  
121 accompanied by abnormally shaped heads, trapped stage 16 spermatids within the  
122 epithelium and the presence of cytoplasmic material filling the lumen of the tubules (**Fig.**  
123 **1F**). Within the cauda epididymis, knockout animals displayed accumulations of residual  
124 bodies, cytoplasmic material, shed germ cells and occasional abnormally shaped sperm  
125 heads, but an overall absence of mature sperm as compared to wildtype animals (**Fig.**  
126 **1G**). No differences were detected in knockout testes at mRNA levels of nitric oxide  
127 synthases 1-3 (NOS1-3) or superoxide dismutases 1-3 (SOD1-3), and the ratio of  
128 Bax/Bcl2 was unchanged compared to wildtype testes, suggesting no increase in  
129 apoptotic events or oxidative stress (**Fig. S2**).

130

### 131 *Absence of Adgb interferes with the maturation of elongating spermatids*

132 To determine the temporal expression pattern of Adgb during spermatogenesis, wildtype  
133 embryos and pups at different post-natal ages, corresponding to the stages of the first  
134 wave of spermatogenesis during puberty, were dissected and analysed by RT-qPCR.  
135 Whereas the expression of Adgb nearly remained undetectable until post-natal day 21  
136 (corresponding to the stage of round spermatids), Adgb mRNA levels drastically  
137 increased to reach a peak at post-natal day 25, coinciding with the first elongating  
138 spermatids (**Fig. 2A**). Bulk and single-cell RNA sequencing analysis in mouse and  
139 human datasets available at the ReproGenomics Viewer resource (Darde et al. 2015,

140 Darde et al. 2019) confirmed the conserved expression pattern of ADGB in spermatids  
141 (Green et al. 2018, Jégou et al. 2017, Lukassen et al. 2018, Wang et al. 2018) (**Fig. S3**).  
142 Accordingly, Adgb protein expression equally reached its peak at post-natal days 26 to  
143 28 (**Fig. 2B,C**). This finding was further confirmed by propidium iodide staining and  
144 FACS sorting on testis lysates of the different genotypes. While no variations could be  
145 detected for phases 2C (spermatogonia, secondary spermatocytes, testicular somatic  
146 cells), S-phase (pre-meiotic spermatogonia), 4C (primary spermatocytes) and 1C (round  
147 spermatids), an abnormal accumulation of elongating and elongated spermatids (phase  
148 H) could be detected in knockout animals, suggesting a blockade in the elongation  
149 process (**Fig. 2D**). Additionally, immunofluorescence (**Fig. 2E**), mRNA *in situ*  
150 hybridization (**Fig. 2F**) and X-gal (**Fig. 2G**) stainings of testis sections from wildtype  
151 and knockout mice confirmed the presence of Adgb within layers containing post-  
152 meiotic cells, and further intensifying towards the lumen and mature sperm (**Fig. 2E-G**).  
153 Moreover, in mature sperm, Adgb expression could be visualized within the midpiece  
154 and along the whole flagellum by both X-gal (**Fig. 2F**) and immunofluorescence (**Fig.**  
155 **2G**) stainings.

156

157 *Adgb is required for proper assembly of microtubules and positioning of mitochondria*

158 To gain additional insights into the origin of male infertility, cauda epididymal sperm  
159 was collected from both wildtype and knockout mice, and visualized under a  
160 microscope. While wildtype sperm appeared normal, very few knockout spermatozoa  
161 were found and displayed various defects of the head and/or flagellum structure,  
162 including shortened or bifide tails, loopings of the flagellum, and immature acrosomal  
163 structures (**Fig. 3A**). Knockout sperm acrosome structure appeared partially conserved,  
164 with sperm displaying either normal acrosomes, or various defects in shape or staining



165 intensity, or total absence (**Fig. 3B**). TEM ultrastructural analysis of testis sections  
166 further revealed misshaped heads with nuclear inclusions, disorganised axonemes failing  
167 to arrange around the flagella, misaligned microtubules, defective manchette elongation,  
168 and chaotic mitochondria within the forming midpieces of elongating spermatids in  
169 knockout samples (**Fig. 3C**).

170

171 *The Adgb-dependent transcriptome reveals dysregulation of multiple spermiogenesis*  
172 *genes*

173 To understand the molecular consequences of loss of Adgb in the testis, we performed  
174 RNA-sequencing experiments on total testis RNAs from wildtype and knockout mice at  
175 post-natal day 25. An elaborate set of significant differentially expressed genes (74 genes  
176 upregulated and 204 downregulated) was identified, underscoring the crucial function of  
177 Adgb in spermatogenesis (**Fig S4, Dataset S1**). Functional analysis based on Gene  
178 Ontology term enrichments confirmed that many of these genes are related to sperm  
179 head, acrosome reaction, acrosomal membrane, sperm motility, spermatid development  
180 and spermatid differentiation in line with the pronounced structural changes in  
181 spermatids during spermiogenesis. Intriguingly, a more refined Ingenuity pathway-based  
182 analysis (IPA) of the differentially expressed gene set provided a link to testosterone  
183 synthesis as deregulated pathway, as evidenced by reduced 17 $\beta$ hsd3 and Lhcgr mRNA  
184 levels in knockout mice and consistent with the observed decrease in serum testosterone  
185 levels (**Fig. 1E, Fig. S4**).

186

187 *Adgb interacts and co-localizes with Sept10*

188 To obtain more insights into the physiological function of Adgb, we explored the Adgb-  
189 dependent interactome. Total protein extracts from wildtype testes were

190 immunoprecipitated (IP) with anti-Adgb antibody or IgG and subsequently submitted to  
191 mass spectrometry (MS) analysis to reveal potential interacting proteins of Adgb.  
192 Among the specifically enriched proteins, there were various members of the septin  
193 family of proteins, such as Sept10, Sept11, Sept2, and Sept7 (**Fig. 4A and Dataset S2**).  
194 Particular focus was put on Sept10 for further downstream experiments given its strong  
195 enrichment combined with high abundance in the immunoprecipitation. To confirm the  
196 interaction between Adgb and Sept10, reciprocal co-immunoprecipitation (co-IP)  
197 experiments were performed (**Fig. 4B,C**) on tissue extracts from wildtype and knockout  
198 testes (**Fig. 4B**) and in HEK293 cells overexpressing full-length ADGB (**Fig. 4C**) and  
199 Sept10. The results demonstrate that Adgb and Sept10 interact both *in vivo* (**Fig. 4B**) and  
200 *in vitro* (**Fig. 4C**), whereas in testis lysates of Adgb-deficient mice, no Sept10  
201 precipitation was observed (**Fig. 4B**). Endogenous Sept10 protein levels were equal in  
202 testis lysates of Adgb-deficient and wildtype mice. Similar observations were made for  
203 Sept11, Sept7, and Sept2, as well as for other septins that are crucial for  
204 spermatogenesis, including Sept8, Sept9 and Sept14 (**Fig. S5**). We next investigated  
205 whether the interaction with Sept10 occurs at the N-terminal or the C-terminal portion of  
206 Adgb (**Fig. 4D,E**). Following co-overexpression of Adgb deletion constructs with  
207 SEPT10 and subsequent co-immunoprecipitation, immunoblotting revealed that both  
208 parts of ADGB interact with SEPT10 (**Fig. 4D,E**), and that this interaction remained  
209 intact also upon deletion of the coiled-coil domain of ADGB (**Fig. S6**).  
210 Consistent with a functional interaction, the temporal expression profiles of SEPT10 and  
211 ADGB substantially overlapped as illustrated by analysis of bulk and single-cell RNA  
212 sequencing datasets of mouse and human RNA (**Fig. S3**) as well as by RT-qPCR and  
213 immunoblotting of mouse tissue samples (**Fig. S7**). The localization of Adgb and Sept10  
214 was assessed in microdissected tubules and in epididymal sperm by

215 immunofluorescence. Co-localization of Adgb and Sept10 was visible during the Golgi  
216 phase in the acrosomal granule, during manchette and sperm tail formation (**Fig. 5A**),  
217 and at the level of the sperm annulus in mature wildtype sperm (**Fig. 5B**). A moderate  
218 Sept10 staining was also observed in the neck region of mature sperm (**Fig. 5B**). In  
219 knockout epididymal sperm, only a single signal, likely corresponding to the annulus,  
220 was observed and displayed abnormal migration, indicating defective manchette or  
221 microtubule formation (**Fig. 5B**). The migration of the annulus drives mitochondrial  
222 placement along the forming mid-piece (Toure et al. 2011). Since knockout animals  
223 displayed abnormal ultrastructural mitochondria organisation (**Fig. 3C**), CoxIV staining  
224 was performed on wildtype and knockout epididymal sperm. As expected, a robust  
225 staining was observed along the whole midpiece in wildtype sperm, whereas  
226 mitochondria were barely visible and formed a cloudy structure around the neck region  
227 of knockout sperm (**Fig. 5B**).

228

229 *ADGB contributes to Sept10 proteolytic cleavage in vitro*

230 To analyse the functional consequences of the SEPT10-ADGB interaction we transiently  
231 co-overexpressed both proteins in HEK293 cells. Intriguingly, apart from the intact form  
232 of overexpressed SEPT10 at 60 kDa, increased levels of a lower band of 37 kDa were  
233 consistently detected in the presence of exogenous ADGB (**Fig. 6A**), in a dose-  
234 dependent manner (**Fig. 6A**). Immunoblotting with a V5-antibody upon co-  
235 overexpression of a C-terminal V5-tagged SEPT10 with ADGB (**Fig. 6B**) as well as the  
236 presence of this band upon SEPT10/ADGB co-IP (**Fig. 6B, Fig. S8**) further support its  
237 origin as proteolytic SEPT10 product. To investigate a potential influence of the globin  
238 domain this experiment was repeated under normoxic and hypoxic conditions (0.2% O<sub>2</sub>)  
239 but no differences were observed upon exposure to hypoxic conditions (**Fig. 6C**). To

240 determine a potential role of calmodulin we constructed a deletion mutant lacking the IQ  
241 domain. Notably, transient overexpression of IQ-mutant ADGB resulted in considerably  
242 reduced appearance of the 37 kDa band relative to WT ADGB (**Fig. 6D**). This finding  
243 prompted us to experimentally validate the suspected CaM-ADGB interaction. Whereas  
244 co-IP experiments following overexpression of full-length ADGB did not interact with  
245 CaM under basal experimental conditions in HEK293 cells (data not shown), a truncated  
246 construct covering the globin and IQ domains displayed robust ADGB-CaM interaction  
247 (**Fig. 6E**). Consistently, MS analysis of proteins that were present in the IP of the  
248 overexpressed, isolated globin domain revealed a prominent enrichment of endogenous  
249 CaM (**Fig. S9 and Dataset S3**). Importantly, individual or double mutation of the  
250 proximal histidine (HisF8) or distal glutamine (GluE7), critical residues in the globin  
251 domain for heme coordination, did not alter the interaction, suggesting that the ADGB-  
252 CaM interaction occurs independently of heme incorporation (**Fig. 6F, Fig. S10**). As an  
253 additional layer of support for the ADGB-CaM interaction, chimeric Gal4 DNA-binding  
254 domain and VP16 transactivation domain-based fusion constructs were generated for  
255 mammalian 2-hybrid (M2H) luciferase reporter gene assays (**Fig. 6G,H**). These M2H  
256 assays performed in 2 different cell lines, HEK293 and A375, revealed up to 7.5-fold  
257 increase in luciferase activity upon co-transfection of both chimeric proteins compared to  
258 single construct transfections, providing independent evidence that ADGB interacts with  
259 CaM. To further assess the potential O<sub>2</sub>-dependency of the CaM-ADGB interaction, we  
260 repeated the M2H assays in A375 cells under hypoxic conditions. Exposure to hypoxic  
261 conditions (0.2% O<sub>2</sub>) did not alter luciferase activity, while luciferase activity of an *EPO*  
262 promoter-driven reporter gene increased, suggesting that the ADGB-CaM interaction is  
263 O<sub>2</sub>-independent (**Fig. 6H**). This result is consistent with the maintained ADGB-CaM  
264 interaction following mutation of critical residues in the globin domain in co-IP

265 experiments and unchanged ADGB-dependent cleavage of SEPT10 under hypoxic  
266 conditions. Collectively, these *in vitro* data suggest a scenario in which exogenous  
267 ADGB proteolytically contributes to cleavage of exogenous SEPT10 in an O<sub>2</sub>-  
268 independent but CaM-dependent manner.

269 **Discussion**

270 In the present study, we aimed to explore the testicular function of Adgb by generating  
271 and analysing Adgb<sup>-/-</sup> constitutive knockout mice. Our results demonstrate that Adgb is  
272 required for late stages of spermatogenesis and male fertility, as evidenced by a total lack  
273 of functional sperm in knockout animals. Also, a reduction in testis weight, reduced  
274 testosterone production and dysregulated testosterone-associated genes such as Lhcgr  
275 and 17βhsd3 were observed. This finding is remarkable as Adgb displays little to no  
276 expression levels in the testosterone-producing Leydig cells. Our data further show that  
277 Adgb is indispensable for proper microtubule formation, mitochondria localisation and  
278 annulus positioning. Spermatid elongation is marked by profound morphological  
279 changes, which start with the formation of the acrosome, concomitant with the first  
280 expression of Adgb. Adgb mRNA and protein are detectable from post-natal day 21  
281 onwards, the stage at which the acrosomal granule is formed (Clermont and Leblond  
282 1955, Khawar, Gao, and Li 2019). Accordingly, a strong signal was visible within the  
283 acrosomal granule, and Adgb could be detected in all steps of spermatogenesis within  
284 the acrosome, including in mature sperm. Moreover, the defects in head shape and  
285 acrosome structure visible in Adgb mutant mice strongly suggest a function of Adgb in  
286 the maturation of the acrosome.

287 To understand the molecular mechanisms by which Adgb may exert its function during  
288 spermatogenesis we analysed the interactome of Adgb by LC-MS/MS after  
289 immunoprecipitation of the latter in testicular lysates. Strikingly, several members of the  
290 septin family ranked in the top hits. Septins are conserved GTPases that have the ability  
291 to form large oligomers and filamentous polymers and which associate with cell  
292 membranes and with the cytoskeleton. They serve as scaffolds for the proper localization  
293 of intracellular proteins via their diffusion barrier-forming characteristic. All septins

294 display a conserved structure formed by an N-terminal proline-rich polybasic region  
295 which interacts with membrane phospholipids, a central GTP-binding domain, a C-  
296 terminal region of unknown function (the septin unique element) further flanked by a C-  
297 terminal tail containing  $\alpha$ -helical coiled coils of varying sizes enabling the polymer-  
298 forming protein-protein interactions typical of septins (Dolat, Hu, and Spiliotis 2014).  
299 Thirteen septins have been described so far in mammals (Sept1-12 and Sept14), further  
300 sub-classified into 4 distinct families depending on their biochemical and biophysical  
301 properties (Kinoshita 2003). Sept10 belongs to the Sept6 group (containing Sept6, Sept8,  
302 Sept10, Sept14, as well as Sept11, the latter also present in the Adgb interactome), which  
303 - unlike the other septin members - are catalytically inactive and constitutively bound to  
304 GTP (Sirajuddin et al. 2009). In sperm, Sept1, 4, 6, 7, and 12 have been localized to the  
305 sperm annulus, where they polymerize to a filamentous structure, forming a barrier  
306 between the midpiece and the principal piece of the spermatozoon (Toure et al. 2011). In  
307 this study, we focused on Sept10, and detected a strong signal in acrosomal granules in  
308 S7 spermatids, in the migrating annulus of S12 spermatids as well as in the annulus and  
309 neck region of mature sperm together with Adgb, suggesting a very early interaction  
310 between the two proteins, resulting in a missing signal (likely the annulus) upon absence  
311 of Adgb in knockouts. It is noteworthy that two independently generated mouse models  
312 for Sept4<sup>-/-</sup> as well as Sept12<sup>+/-</sup> mice are male infertile and harbour disorganized sperm  
313 mitochondria (Ihara et al. 2005, Kissel et al. 2005, Lin et al. 2009). Moreover, Sept4<sup>-/-</sup>  
314 mice display a bent sperm tail and absence of annulus (Ihara et al. 2005, Kissel et al.  
315 2005), whereas Sept12<sup>+/-</sup> mice exhibit broken acrosomes, misshaped nuclei and increased  
316 apoptosis of germ cells (Lin et al. 2009). Correspondingly, SEPT12 mutations have been  
317 described in infertile men displaying abnormal sperm including defective annulus with a  
318 bent tail (Kuo et al. 2012). Additionally, defective sperm head morphology and DNA

319 integrity have recently been reported for two different SEPT14 missense mutations  
320 (Wang et al. 2019, Lin et al. 2020). Previous findings proposed a septin ring assembly as  
321 octameric filaments at the annulus, classically composed of septins 12-7-6-2-2-6-7-12 or  
322 12-7-6-4-4-6-7-12, in which septins 12 and 7 and septins 6 and 2/4 are connected  
323 through their GTP-binding domain (G-interface), whereas septins 7 and 6 and the two  
324 central septins 2/4 interact via their NC-termini (NC-interface) (Sirajuddin et al. 2007,  
325 Kuo et al. 2015). It was further proposed that septins from the same sub-group can  
326 substitute each other (Sellin et al. 2011). It is therefore tempting to speculate that Sept10  
327 might replace Sept6 in the ring, thus Adgb's localisation at the annulus. The  
328 identification of Sept7 and Sept2 as additional Adgb-interacting proteins is in favour of  
329 this assumption. Interestingly, another ring-like septin structure was recently described at  
330 the sperm neck, composed of Sept12 which complexes together with Sept1, Sept2,  
331 Sept10 and Sept11. Two mutations of Sept12 identified in patients disrupted the  
332 complex, leading to unstable head-tail junctions and defective connecting piece  
333 formation. Strikingly, the mutation of Sept12 and the subsequent disruption of the  
334 complex led to loss of Sept10 signal in the annulus (Shen et al. 2020) as also observed in  
335 Adgb-deficient mice. Accordingly, our data suggest an interdependence between Adgb  
336 and Sept10, which is required for the maintenance of the annulus, head shaping and  
337 proper mitochondrial localisation.

338 Septins have also been identified as components of cilia, which are hair-like  
339 microtubular protrusions at the surface of various cell types. Sept2 forms a diffusion  
340 barrier at the base of the cilium, impeding ciliary formation through loss of Sonic  
341 Hedgehog signalling when depleted (Hu et al. 2010). Sept2/7/9 form a complex that  
342 associates with the ciliary axoneme, thereby regulating ciliary length (Ghossoub et al.  
343 2013). Accordingly, septin association with the cytoskeleton and particularly with



344 microtubular structures has been extensively studied (Spiliotis and Nakos 2021), and  
345 numerous other cilia-related proteins participate in sperm flagellum formation.  
346 Furthermore, most ciliopathies include male infertility and immotile sperm due to  
347 defective axonemal organisation (Brown and Witman 2014). Likewise, Adgb knockout  
348 mice display aberrant microtubule arrangements, thus it cannot be excluded that a  
349 scaffolding and simultaneous regulatory action between Adgb and Sept10 is necessary to  
350 support microtubular structure. Moreover, a recent study reported the consistent presence  
351 of Adgb in the ciliomes of three distinct evolutionary ancestral taxa, further suggesting a  
352 conserved function related to microtubular organisation and likely flagella formation  
353 (Sigg et al. 2017). In line with this study, our recent *in vitro* investigations have  
354 demonstrated that Adgb is transcriptionally regulated by FoxJ1, a master regulator of  
355 ciliogenesis (Koay et al. 2021).

356 A robust Adgb-Sept10 interaction was also detected by co-immunoprecipitation  
357 experiments, both in testis lysates as well as in HEK293 cells overexpressing ADGB and  
358 SEPT10. Unexpectedly, interaction was still observed upon truncating the N-terminal  
359 and C-terminal portions of ADGB. Furthermore, specific mutation of the coiled-coil  
360 domain of either ADGB or SEPT10 did not disrupt the interaction, suggesting that  
361 interaction of ADGB and SEPT10 occurs at various locations along the two proteins and  
362 that the proteins may entangle around each other. This close interaction may serve as  
363 targeting mechanism for the proteolytic processing of SEPT10 that we could observe  
364 upon ectopic expression of both proteins. The unique chimeric domain structure of Adgb  
365 with an N-terminal calpain-like protease domain and an IQ motif within a rearranged  
366 globin domain suggests a CaM-mediated regulation. Indeed, we could demonstrate that  
367 ADGB interacts with CaM via its IQ binding motif, and that the IQ binding motif seems  
368 pivotal in the observed proteolytic cleavage of SEPT10. CaM is a versatile protein,

369 which can interact with a broad range of target proteins and act in a wide variety of  
370 cellular pathways and processes (Villalobo et al. 2018). Calmodulin-bound calcium  
371 represents a crucial activator of proteolytic activity of Ca<sup>2+</sup>-dependent calpain proteases  
372 (Villalobo, González-Muñoz, and Berchtold 2019, Bähler and Rhoads 2002). Most  
373 interestingly, calpain-dependent proteolytic cleavage of septins is not unprecedented: it  
374 was shown that Sept5 is a substrate of both calpain-1 and calpain-2 in platelets, where  
375 the cleavage triggers secretion of chemokine-containing granules (Randriamboavonjy et  
376 al. 2012). Additionally, it was reported that small modifications in septin structures may  
377 have profound consequences on the protein's function. For example, a single point  
378 mutation within the N-terminus of Sept2 leads to homomeric filament formation without  
379 including any other septin type (Kim et al. 2012). Furthermore, the PKA-dependent  
380 phosphorylation of Sept12 at a single site leads to the disruption of the Sept12 filament,  
381 which dissociates from Sept7-6-2 and Sept7-6-4 complexes (Shen et al. 2017). Finally,  
382 SUMOylation failures are associated with aberrant filament formation for Sept6, 7 and  
383 11, which are still able to interact with other endogenous septin members, remarkably in  
384 a stronger way than when properly SUMOylated (Ribet et al. 2017). It is therefore  
385 conceivable that CaM-dependent Adgb-mediated proteolytic cleavage of Sept10 may be  
386 a prerequisite for proper Sept10 function or localization within the sperm neck or  
387 annulus.

388 The presence of an oxygen-binding globin might be beneficial in a strongly hypoxic  
389 environment such as the testis. Indeed, testicular interstitial oxygen levels are very low,  
390 and tissue oxygen pO<sub>2</sub> is estimated to represent only 20% of the testicular artery pO<sub>2</sub>  
391 (Free, Schluntz, and Jaffe 1976), whereby the microvasculature controls the oxygen  
392 supply to the testicular tissue and thereby indirectly also controlling the oxygen reaching  
393 the large seminiferous tubules by diffusion, only (Reyes et al. 2012). We previously

394 demonstrated heme hexa-coordination of Adgb (Bracke, Hoogewijs, and Dewilde  
395 2018b), a unique characteristic also reported for mammalian Cygb and Ngb, rather  
396 associated with functionality beyond canonical oxygen transport and storage. Similar to  
397 the postulated cytoprotective functions against ROS of Cygb and Ngb (Burmester and  
398 Hankeln 2009, Burmester and Hankeln 2014, Randi et al. 2020, Keppner et al. 2020), it  
399 is tempting to speculate that Adgb might be involved in detoxification of harmful ROS  
400 as male infertility is affected by ROS, and spermatozoa are particularly sensitive to  
401 ROS-induced damage. The lack of Adgb-dependent differential regulation of redox  
402 sensitive genes on transcriptome or single gene level between wildtype and Adgb-  
403 deficient bulk testis tissue lysates argues against, but does not exclude, an anti-oxidative  
404 function of Adgb. In line with these observations, the absence of any O<sub>2</sub>-dependent  
405 effect of our *in vitro* findings on ADGB-dependent SEPT10 cleavage suggests that the  
406 proteolytic activity of Adgb is independent of a functional globin domain. Although we  
407 reported heme incorporation on recombinantly expressed human protein (Bracke,  
408 Hoogewijs, and Dewilde 2018b), Adgb orthologs in more basal organisms lack the  
409 crucial proximal His, suggesting that heme-binding might not be the most prominent  
410 characteristic feature of Adgb. Establishing a mechanistic explanation for the chimeric  
411 domain structure of the Adgb protein will remain a major challenge for the future.

412

413 In conclusion our study is the first to demonstrate a functional role for androglobin, the  
414 fifth mammalian globin. We present convincing *in vivo* evidence that Adgb is required  
415 for murine spermatogenesis. Interdependence between Adgb and Sept10 is necessary for  
416 sperm head shaping via the manchette and proper flagellum formation. *In vitro* data  
417 demonstrated CaM binding to ADGB and suggested that ADGB contributes to  
418 proteolytical cleavage of SEPT10 in a CaM-dependent manner. Our work provides a

419 crucial contribution to the characterization of the physiological role of this novel

420 enigmatic chimeric globin type.

421

422 **Materials and methods**

423 *Animals, ethics statement and genotyping*

424 All experimental procedures and animal maintenance followed Swiss federal guidelines  
425 and the study was revised and approved by the “*Service de la sécurité alimentaire et des*  
426 *affaires vétérinaires*” (SAAV) of the canton of Fribourg, Switzerland (license number  
427 2017\_16\_FR). Animals were housed in rooms with a 12 hour/12 hour light/dark cycle,  
428 controlled temperature and humidity levels, and had free access to food and water.  
429 Interbreeding of heterozygous animals was performed to obtain wildtype (+/+),  
430 heterozygous (Tg/+ for tm1a and tm1b, or +/- for tm1d), and homozygous/knockout  
431 (Tg/Tg for tm1a and tm1b, or -/- for tm1d) littermates, that were experimentally used, if  
432 not otherwise stated, between 3 to 9 months of age. Genotyping of tm1a and tm1b  
433 animals was performed using the following primers (**Fig. S1**): F1 5’-  
434 CCGTGCCCAGCTATATGAGT-3’; R1 5’-CACAAACGGGTTCTTCTGTTAGTCC-3’;  
435 R2 5’-CCAGCGGTGTTCCCTTCTTA-3’. Primers for tm1d genotyping were the  
436 following (**Fig. S1**): F1, R2, and R4 5’-ACTGATGGCGAGCTCAGACC-3’. PCR  
437 amplification was performed for 36 cycles of 1 min at 95°C, 1 min at 56°C and 1 min at  
438 72°C. The PCR products were separated by electrophoresis on 2% agarose gels and  
439 visualized by ethidium bromide staining.

440

441 *Gene targeting and knockout mouse generation*

442 The Adgb<sup>tm1a(KOMP)Wtsi</sup> (tm1a) strain was generated by blastocyst microinjection of  
443 embryonic stem (ES) cell clone EPD0707\_3\_H06, provided by the Knockout Mouse  
444 Project (KOMP) (Skarnes et al. 2011). Correct targeting of the Adgb locus was verified  
445 prior to microinjection by long-range PCR using primers 5’S 5’-  
446 CTGTACACTGGTTGTACTGGTACAACACTG-3’; 5’AS 5’-

447 GGACTAACAGAAGAACCCGTTGTG-3'; 3'S 5'-  
448 CACACCTCCCCCTGAACCTGAAAC-3'; 3'AS 5'-  
449 GTACTTGATTGGACGATGATCCAAG-3' (**Fig. S1**), generating a band of 6.7 kb for  
450 5' primers, and 5.1 kb for 3' primers (**Fig. S1**). Targeted clones were confirmed by  
451 Southern blot analysis using a hybridization probe that targets exon 13 (**Fig. S1**)  
452 revealing a band of 4.1 kb (wildtype) or 3.2 kb (tm1a allele) following digestion of  
453 genomic DNA with *PvuII*, and a band of 2.8 kb (wildtype) or 2.4 kb (tm1a allele)  
454 following digestion of genomic DNA with *PstI* (**Fig. S1**). Chimeric mice were bred with  
455 C57BL/6-Tyr<sup>c-Brd</sup> mice, and germline transmission in the F1 offspring was verified by  
456 PCR using primers F1, R1 and R2 (**Fig. S1**). The mice were further bred to C57BL/6N-  
457 Hprt<sup>Tg(CMV-cre)Brd/Wtsi</sup> transgenic mice expressing the Cre allele to delete exons 13 and 14  
458 and the neo cassette to generate the Adgb<sup>tm1b(KOMP)Wtsi</sup> strain (tm1b), or to C57BL/6N-  
459 Gt(ROSA)26Sor<sup>tm1(FLP1)Dym/Wtsi</sup> transgenic mice expressing the Flp recombinase to delete  
460 the whole transgene cassette, thereby generating the Adgb<sup>tm1c(KOMP)Wtsi</sup> strain. The latter  
461 were further crossed with C57BL/6N-Hprt<sup>Tg(CMV-cre)Brd/Wtsi</sup> transgenic mice to delete  
462 exons 13 and 14, thereby generating the Adgb<sup>tm1d(KOMP)Wtsi</sup> (tm1d, knockout) strain. The  
463 Cre recombinase allele was bred out before any experiments were performed.

464

#### 465 *RNA extraction and RT-qPCR*

466 Testes were frozen in liquid nitrogen and stored at -80°C. Tissues were homogenized  
467 using a TissueLyser (Qiagen, Valencia, CA, USA). Subsequent RNA isolation and  
468 cDNA synthesis were performed as described previously (Keppner et al. 2019). In brief,  
469 RNA was extracted using an RNeasy Mini Kit (Qiagen,) and reverse-transcription (RT)  
470 was performed with 1.5 µg of total RNA and PrimeScript reverse transcriptase (Takara  
471 Bio Inc, Kusatsu, Japan). RT-quantitative (q)-PCR was performed on a CFX96 C1000

472 real-time PCR cycler (Bio-Rad Laboratories, Hercules, CA) using SYBRgreen PCR  
473 master mix (Kapa Biosystems, London, UK). 21.5 ng of cDNA were loaded, and each  
474 sample was run as duplicate. mRNA levels were normalized to  $\beta$ -actin as previously  
475 described (De Backer et al. 2021). Primer sequences are displayed in **Table S1**.

476

#### 477 *Cell culture and transfection*

478 HEK293 and A375 (ATCC CRL-1619) cells were maintained in Dulbecco's Minimum  
479 Essential Media (DMEM) (Gibco, Life Technologies, Carlsbad, CA, USA), containing  
480 L-glutamine, supplemented with 10% heat-inactivated fetal bovine serum FBS (PAN  
481 Biotech, Aidenbach, Germany) and 100 Units/mL penicillin/100  $\mu$ g/mL streptomycin  
482 (Gibco, Life Technologies, Carlsbad, CA, USA). Both cell lines were incubated in a  
483 humidified 5% CO<sub>2</sub> atmosphere at 37°C and were routinely subcultured after  
484 trypsinization. For hypoxic experiments, cells were seeded out in 6-well plates or 100-  
485 mm culture dishes. The subsequent day, hypoxia experiments were carried out at 0.2%  
486 O<sub>2</sub> and 5% CO<sub>2</sub> in a gas-controlled glove box (InvivoO2 400, Baker Ruskinn, Bridgend,  
487 UK) for 24 hours. Transfection of HEK293 cells was performed using calcium-  
488 phosphate (Jordan, Schallhorn, and Wurm 1996), with 2  $\mu$ g of plasmid DNA for regular  
489 immunoblotting experiments, and 5  $\mu$ g of plasmid DNA for immunoprecipitation  
490 experiments. Briefly, the DNA was diluted in sterile water and mixed with 250 mM  
491 CaCl<sub>2</sub>. 25  $\mu$ M chloroquine was added to the cells and allowed to incubate for a minimum  
492 of 20 min. Prewarmed 37°C 2x HBS buffer pH 7.05 (NaCl 280 mM, KCl 10 mM,  
493 Na<sub>2</sub>HPO<sub>4</sub> 1.5 mM, D-glucose 12mM, HEPES 50mM) was added to the DNA solution  
494 (50% v/v), and the transfection mixture was added dropwise to the cells. The medium  
495 was replaced after 6 hours. Transfection of A375 cells was performed using JetOptimus

496 (Polyplus-transfection SA, Illkirch-Graffenstaden, France) according to the  
497 manufacturer's instructions.

498

#### 499 *SDS-PAGE and immunoblotting*

500 Tissues were homogenized as described (Keppner et al. 2019). Cells were lysed in triton  
501 buffer (Tris-HCl [20 mM, pH 7.4], NaCl [150 mM], triton X-100 [1%]), left on ice for  
502 15 min, centrifuged, and the proteins were quantified by Bradford assay.  
503 25 µg of proteins were separated by SDS-PAGE on 10% gels, and proteins were  
504 electrotransferred to nitrocellulose membranes (Amersham Hybond-ECL, GE  
505 Healthcare, Chicago, IL, USA). The membranes were incubated overnight at 4°C with  
506 primary antibody (**Table S2**) and for 1 hour with donkey anti-rabbit or anti-mouse IgG  
507 HRP-conjugated secondary antibody (1:5000, Amersham, Buckinghamshire, UK). All  
508 antibodies were diluted in TBS-tween (1%) and dried milk (1%). The signal was  
509 revealed using ECL Prime (Amersham, Buckinghamshire, UK) on a C-DiGit Western  
510 blot scanner (LI-COR Biosciences), and quantified using ImageStudio program (LI-COR  
511 Biosciences, Lincoln, NE, USA). The polyclonal anti-Adgb antibody was custom-made  
512 (Proteintech Group Inc, Rosemont, IL, USA). A fusion protein immunogen raised  
513 against the 409-745 amino acid region of mouse Adgb was used for the immunisation of  
514 two rabbits over a period of 102 days. The antibodies in immune sera were affinity-  
515 purified. Pre-bleeds, test bleeds and purified antibodies were tested and validated by  
516 immunoblotting on wildtype and knockout testis extracts.

517

#### 518 *Immunoprecipitation*

519 For immunoprecipitation (IP) of subsequent LC-MS/MS and immunoblotting analyses, 4  
520 and 2 mg of proteins were used, respectively. The protein lysates were first pre-cleared



521 for 24 hours at 4°C with G-sepharose beads (GE Healthcare, Chicago, IL, USA) coupled  
522 to rabbit IgG (Bethyl Laboratories Inc, Montgomery, TX, USA). Samples were  
523 incubated overnight at 4°C with 2 µg primary antibody (**Table S2**) or 2 µg rabbit IgG,  
524 followed by 4 hours with G-sepharose beads, then washed 2 times with wash buffer  
525 (Tris-HCl [20 mM, pH 7.4], NaCl [300 mM], LAP [1 mM]), and 3 times with  
526 equilibration buffer (Tris-HCl [20 mM, pH 7.4], NaCl [150 mM], LAP [1 mM]).  
527 Samples were eluted by boiling for 5 min at 95°C in 2x sample buffer, and separated  
528 from the beads by centrifugation.

529

### 530 *LC-MS/MS analysis*

531 Washed IP beads were incubated with *Laemmli* sample buffer and proteins were reduced  
532 with 1 mM DTT for 10 min at 75°C and alkylated using 5.5 mM iodoacetamide for 10  
533 min at room temperature. Protein samples were separated by SDS-PAGE on 4-12%  
534 gradient gels (ExpressPlus, Genscript, New Jersey, NJ, USA). Each gel lane was cut into  
535 6 equal slices, the proteins were in-gel digested with trypsin (Promega, Madison, WI,  
536 USA), and the resulting peptide mixtures were processed on StageTips (Rappsilber,  
537 Mann, and Ishihama 2007, Shevchenko et al. 2006).

538 LC-MS/MS measurements were performed on a Q Exactive Plus mass spectrometer  
539 (Thermo Fisher Scientific, Waltham, MA, USA) coupled to an EASY-nLC 1000  
540 nanoflow HPLC (Thermo Fisher Scientific). HPLC-column tips (fused silica) with 75  
541 µm inner diameter were packed with Reprosil-Pur 120 C18-AQ, 1.9 µm (Dr. Maisch  
542 GmbH, Ammerbuch, Germany) to a length of 20 cm. A gradient of solvents A (0.1%  
543 formic acid in water) and B (0.1% formic acid in 80% acetonitrile in water) with  
544 increasing organic proportion was used for peptide separation (loading of sample with  
545 0% B; separation ramp: from 5-30% B within 85 min). The flow rate was 250 nL/min

546 and for sample application 650 nL/min. The mass spectrometer was operated in the data-  
547 dependent mode and switched automatically between MS (max. of  $1 \times 10^6$  ions) and  
548 MS/MS. Each MS scan was followed by a maximum of ten MS/MS scans using  
549 normalized collision energy of 25% and a target value of 1000. Parent ions with a charge  
550 state form  $z = 1$  and unassigned charge states were excluded from fragmentation. The  
551 mass range for MS was  $m/z = 370-1750$ . The resolution for MS was set to 70,000 and for  
552 MS/MS to 17,500. MS parameters were as follows: spray voltage 2.3 kV; no sheath and  
553 auxiliary gas flow; ion-transfer tube temperature 250°C. The MS raw data files were  
554 uploaded into the MaxQuant software version 1.6.2.10 for peak detection, generation of  
555 peak lists of mass error corrected peptides, and for database searches (Tyanova, Temu,  
556 and Cox 2016). A full-length UniProt mouse (based on UniProt FASTA version April  
557 2016) or human database (UniProt FASTA version March 2016) additionally containing  
558 common contaminants, such as keratins and enzymes used for in-gel digestion, was used  
559 as reference. Carbamidomethylcysteine was set as fixed modification and protein amino-  
560 terminal acetylation and oxidation of methionine were set as variable modifications.  
561 Three missed cleavages were allowed, enzyme specificity was trypsin/P, and the MS/MS  
562 tolerance was set to 20 ppm. The average mass precision of identified peptides was in  
563 general less than 1 ppm after recalibration. Peptide lists were further used by MaxQuant  
564 to identify and relatively quantify proteins using the following parameters: peptide and  
565 protein false discovery rates, based on a forward-reverse database, were set to 0.01,  
566 minimum peptide length was set to 7, minimum number of peptides for identification  
567 and quantitation of proteins was set to one which must be unique. The ‘match-between-  
568 run’ option (0.7 min) was used.  
569  
570

571 *Propidium iodide staining and flow cytometry*

572 Preparation of germ cell suspensions was achieved as described (Jeyaraj, Grossman, and  
573 Petrusz 2003). Briefly, decapsulated testes were incubated in 0.5 mg/mL collagenase  
574 type IV in PBS, washed with PBS, and incubated in 1 µg/mL DNase and 1 µg/mL  
575 trypsin. Soybean trypsin inhibitor was added, the suspension was filtered, washed in  
576 PBS, fixed with 70% ethanol and stored at 4°C. DNA staining using propidium iodide  
577 was performed as described (Krishnamurthy et al. 2000). Propidium iodide-stained cells  
578 were analysed in a FACScan flow cytometer (Becton-Dickinson Immunocytometry, San  
579 Jose, CA, USA). Cell populations were selected based on their DNA content, and their  
580 relative numbers were calculated using Summit (Cytomation, CO, USA).

581

582 *Histological analyses and immunofluorescence*

583 Testes were fixed in 4% paraformaldehyde and embedded in paraffin. Preparation of  
584 sections and H&E staining was performed as described (Keppner et al. 2015). Pictures  
585 were taken using a Nikon Eclipse microscope (Nikon Corporation, Tokyo, Japan).  
586 For immunofluorescence, testes were fixed in 4% paraformaldehyde (PFA) for at least 1  
587 week, and incubated in 30% sucrose for another week. The testes were embedded in  
588 Optimal Cutting Temperature compound (O.C.T. Tissue-Tek, Sakura Finetek, Tokyo,  
589 Japan), and 5 µm thick sections were cut on a cryotome. For seminiferous tubule  
590 dissections and stainings, slides were prepared as previously described (Kotaja et al.  
591 2004). For sperm stainings, cauda epididymal sperm was retrieved and diluted in PBS. A  
592 drop of the suspension was smeared on glass sections, and fixed by drying for 15 min  
593 and by 4% PFA for 20 min. The slides were blocked in 10% normal goat serum and  
594 0.5% triton X-100 for 1 hour. Testis sections and sperm slides were incubated overnight  
595 at 4°C with primary antibodies (**Table S5**) in 5% normal goat serum and 0.25% triton X-

596 100. The slides were washed with PBS (3x10 min), and incubated with secondary Alexa  
597 Fluor 488 or 594 coupled goat anti-mouse or anti-rabbit IgG (1:300, Invitrogen,  
598 Waltham, MA, USA) for 1 hour, washed again with PBS (3x10 min), and counterstained  
599 with Sudan Black (0.1%) for autofluorescence quenching. Slides were mounted with  
600 fluoromount mounting medium containing DAPI (SouthernBiotech, Birmingham, AL,  
601 USA), and visualized using a Nikon Eclipse fluorescent microscope (Nikon  
602 Corporation).

603

#### 604 *In situ hybridization via RNAscope*

605 RNAscope *in situ* hybridization was performed using BaseScope Detection Reagent Kit  
606 v2 RED (Advanced Cell Diagnostics Inc, Newark, CA, USA, Cat. No. 323900)  
607 according to the manufacturer's instructions. H<sub>2</sub>O<sub>2</sub> treatment, antigen retrieval and  
608 protease treatment were performed on 5 µm-thick sections prior to hybridization with  
609 probes for Adgb (BA-Mm-Adgb-3zz-st, Advanced Cell Diagnostics, Cat. No. 862141),  
610 DapB as negative control (BA-DapB-3zz, Advances Cell Diagnostics, Cat. No. 701011)  
611 and Ppib as positive control (Ba-Mm-Ppib-3zz, Advanced Cell Diagnostics, Cat. No.  
612 701071) at 40°C for 2 hours followed by eight amplification steps. The signal was  
613 revealed with Fast Red, the sections were counterstained with Gill's hematoxylin no. 1  
614 and mounted with VectaMount (Vector Laboratories, Burlingame, CA, USA). The  
615 sections were visualized on a light microscope.

616

#### 617 *Electron microscopy*

618 All electron microscopy experiments were performed at the Electron Microscopy  
619 Platform of the University of Lausanne, Switzerland.

620 Mouse testes were fixed in 2.5% glutaraldehyde solution (EMS, Hatfield, PA, USA) in  
621 phosphate buffer (PB 0.1 M [pH 7.4]) for 1 hour at room temperature and postfixed in a  
622 fresh mixture of osmium tetroxide 1% (EMS) with 1.5% of potassium ferrocyanide  
623 (Sigma, St. Louis, MO, USA) in PB buffer for 1 hour at room temperature. The samples  
624 were then washed twice in distilled water and dehydrated in acetone solution (Sigma) at  
625 graded concentrations (30% - 40 min; 50% - 40 min; 70% - 40 min; 100% - 2x1 hour).  
626 This was followed by infiltration in in Epon resin (EMS, Hatfield, PA, USA) at graded  
627 concentrations (Epon 33% in acetone-4 hours; Epon 66% in acetone-4 hours; Epon  
628 100%-2x8 hours) and finally polymerized for 48 hours at 60°C in an oven. Ultrathin  
629 sections of 50 nm thick were cut using a Leica Ultracut (Leica Mikrosysteme GmbH,  
630 Vienna, Austria), picked up on a copper slot grid 2x1 mm (EMS, Hatfield, PA, USA)  
631 coated with a polystyrene film (Sigma, St Louis, MO, USA). Sections were post-stained  
632 with uranyl acetate (Sigma, St Louis, MO, USA) 4% in H<sub>2</sub>O for 10 min, rinsed several  
633 times with H<sub>2</sub>O followed by Reynolds lead citrate in H<sub>2</sub>O (Sigma, St Louis, MO, USA)  
634 for 10 min and rinsed several times with H<sub>2</sub>O. Micrographs were taken with a  
635 transmission electron microscope FEI CM100 (FEI, Eindhoven, The Netherlands) at an  
636 acceleration voltage of 80kV with a TVIPS TemCamF416 digital camera (TVIPS  
637 GmbH, Gauting, Germany).

638

### 639 *RNA-seq library preparation and transcriptome sequencing*

640 Total RNA from 2 independent samples of wildtype and Adgb<sup>-/-</sup> testis was extracted  
641 using the mirVana miRNA-Kit according to manufacturer's instructions (Life  
642 Technologies, Carlsbad, US). Prior to library construction, RNA quality was assessed  
643 using an Agilent 2100 Bioanalyzer and the Agilent RNA 6000 Nano Kit (Agilent  
644 Technologies, Santa Clara, CA, USA). RNA was quantified using Qubit RNA BR Assay

645 Kit (Invitrogen, Waltham, MA, USA). Libraries were prepared starting from 1000 ng of  
646 total RNA using the RNA Sample Prep Kit v2 (Illumina Inc, San Diego, CA, USA)  
647 including a poly-A selection step following the manufacturer's instructions and  
648 sequenced as 2 x 100 nt paired-end reads using an Illumina HiSeq 2500. Library  
649 preparation and sequencing were performed by the NGS Core Facility of the Department  
650 of Biology, Johannes-Gutenberg University (Mainz, Germany). RNA-Seq data are  
651 available at the European Nucleotide Archive under accession number PRJEB46499.

652

653 *Differential gene expression, GO term annotation and pathway enrichment analyses*

654 Raw sequences were pre-processed to remove low quality reads and residual Illumina  
655 adapter sequences using BBduk from the BBtools suite

656 (<https://sourceforge.net/projects/bbmap/>). The overall sequencing quality and the

657 absence of adapter contamination were evaluated with FastQC. Mapping was performed  
658 with HISAT2 and quantification of gene expression was done using StringTie.

659 Differentially expressed genes were determined using DESeq2. Genes were considered  
660 differentially expressed when presenting  $|\text{fold change}| > 2$  and false discovery rate

661 (FDR)-corrected p-value  $\leq 0.1$ . GO term enrichment analyses were performed using

662 WebGestalt 2019 using the Overrepresentation Enrichment Analysis method, requiring a

663 BH-corrected p-value  $\leq 0.05$  and a minimum enrichment of 4 genes for term/pathway.

664 Enrichment in Canonical Pathways were performed with Qiagen's Ingenuity Pathway

665 Analysis (IPA, Qiagen, Hilden, Germany), Core analysis tool using bias-corrected z-

666 score (when applicable) and BH-corrected p-values  $\leq 0.05$ .

667

668

669

670 *Cloning and construction of expression plasmids*

671 Generation of pLenti6-ADGB was described before (Bracke, Hoogewijs, and Dewilde  
672 2018b), pLenti6-SEPT10-V5 was purchased from DNASU (clone ID HsCD00943271,  
673 DNASU Plasmid Repository, Arizona State University, AZ, USA). All additional  
674 recombinant genes were cloned into pFLAG-CMV<sup>TM</sup>-6a expression vector (Sigma)  
675 unless otherwise specified. All genes were amplified by PCR using Phusion High-  
676 Fidelity DNA polymerase (Thermo Fisher Scientific). Recombinant *SEPT10* with N-  
677 terminal FLAG tag and C-terminal myc tag was constructed by amplifying and ligating  
678 *SEPT10* coding sequence with in-primer designed myc tag (EQKLISEEDL) into the  
679 expression vector, in-frame with the N-terminal FLAG tag. A glycine-serine (GSG)  
680 linker was added between the last codon of *SEPT10* and the first codon of the myc tag.  
681 Truncated ADGB proteins consisting of the calpain-like domain, 350-residue  
682 uncharacterized domain and globin domain (N-terminal mutant), or the 700-residue  
683 uncharacterized region (C-terminal mutant) domain were designed with GFP tags at both  
684 N- and C-termini. The N-terminal mutant ADGB was amplified between codons of  
685 residues 58 – 968 in ADGB while the C-terminal mutant ADGB was amplified between  
686 codons of residues 969 – 1667. Amplicons were designed with 5'- and 3'- overhangs  
687 compatible with two customized GFP amplicons designed to anneal at the 5'- and 3'-  
688 ends of the genes. Glycine-serine linkers (GGSGGGGSGG) were added to bridge the  
689 GFP tags and the truncated ADGB proteins. Similarly, N-terminally GFP-tagged isolated  
690 ADGB globin was cloned by amplifying and ligating amplicons of the *ADGB* globin  
691 gene downstream to a *GFP* gene with complementary overhangs, with the glycine-serine  
692 linker added between the two proteins. With the same construction, GFP-tagged ADGB  
693 globin domains with a single mutation on the proximal histidine in helix F codon 8  
694 (H824G) or the distal glutamine in helix E codon 7 (Q792G), or both (H824G/Q792G)

695 were cloned by amplifying and ligating the globin gene using primers designed to carry  
696 the mutated codon sequence. ADGB $\Delta$ IQ and ADGB $\Delta$ CCD were constructed by  
697 amplifying designed *ADGB* amplicons with compatible overhangs and were ligated in-  
698 frame to generate a *ADGB* gene with deletions in the desired domains. For mammalian  
699 2-hybrid assays, Gal4-CaM and VP16-globin domain were cloned into a pcDNA3.0  
700 expression vector. Gal4 DNA-binding domain or VP16 transactivation domain  
701 sequences were amplified with the in-primer designed glycine-serine linker at the 3'-end  
702 of the amplicons. The coding sequence of *CALM3* and *ADGB* globin domain were  
703 amplified with complementary 5'-end and ligated to the Gal4 and VP16 sequences,  
704 respectively to generate the fusion genes.

705

#### 706 *Reporter gene assays*

707 For mammalian 2-hybrid assays  $2.15 \times 10^5$  HEK293 or  $4 \times 10^5$  A375 cells were  
708 transiently transfected with 1  $\mu$ g firefly luciferase reporter plasmid (5xGAL4-TATA-  
709 luciferase, Addgene, 46756) (Sun et al. 1994) and 500 ng or 200 and 300 ng chimeric  
710 Gal4 and VP16 fusion protein vectors, respectively, in 12- or 6-well format using CaCl<sub>2</sub>  
711 or JetOptimus. To control for differences in transfection efficiency and extract  
712 preparation, 25 ng or 50 ng pRL-SV40 *Renilla* luciferase reporter vector (Promega,  
713 Madison, WI, USA) was co-transfected, respectively for HEK293 and A375 cells.  
714 Cultures were evenly split onto 12-well plates 24 hours after transfection for A375 cells.  
715 For hypoxia control experiments,  $4 \times 10^5$  A375 cells were transiently co-transfected with  
716 500 ng firefly luciferase *EPO* reporter plasmid (Storti et al. 2014) and 50 ng pRL-SV40  
717 *Renilla* luciferase reporter vector. Luciferase activities of duplicate wells were  
718 determined using the Dual Luciferase Reporter Assay System (Promega) as described  
719 before (Schörg et al. 2015). Reporter activities were expressed as relative firefly/*Renilla*



720 luciferase activities. All reporter gene assays were performed at least 3 times  
721 independently.

722

### 723 *Testosterone quantification*

724 Serum testosterone levels were determined as described previously with minor adaptations  
725 (Strajhar et al. 2016). Briefly, for solid-phase extraction (SPE), each serum sample (100  
726  $\mu\text{L}$ ) was mixed with protein precipitation solution (100  $\mu\text{L}$ , 0.8 M zinc sulphate in  
727 water/methanol; 50/50 v/v) containing 33 nM deuterium-labeled testosterone (D2) as  
728 internal standard. Prior SPE, all samples were diluted to a final volume of 1 mL with water  
729 and incubated in a thermoshaker (10 min at 4 °C, 1300 rpm). Following incubation,  
730 samples were centrifuged for 10 min at 16000 g at 4°C, and supernatants (950  $\mu\text{L}$ ) were  
731 transferred to Oasis HBL SPE (1 cc) cartridges (Waters, Milford, MA, USA),  
732 preconditioned with methanol and water (3 x 1 mL each). Samples were washed with water  
733 (2 x 1 mL) and methanol/water (2 x 1 mL, 10/90 v/v). Testosterone was eluted with  
734 methanol (2 x 0.75 mL), evaporated to dryness (3 hours, 35°C) and reconstituted in  
735 methanol (25  $\mu\text{L}$ , 10 min, 4°C, 1300 rpm). Testosterone content was analyzed by ultra-  
736 performance liquid chromatography-MS/MS (UPLC-MS/MS) using an Agilent 1290  
737 Infinity II UPLC coupled to an Agilent 6495 triple quadrupole mass spectrometer  
738 equipped with a jet-stream electrospray ionization interface (Agilent Technologies).  
739 Analyte separation was achieved using a reverse-phase column (1.7  $\mu\text{m}$ , 2.1 mm x 150  
740 mm; Acquity UPLC BEH C18; Waters). Data acquisition and quantitative analysis was  
741 performed by MassHunter (Version B.10.0. Build 10.0.27, Agilent Technologies).

742

743

744

745 *Statistical analysis*

746 All values were presented as mean  $\pm$  standard error of the mean (SEM). Differences in  
747 means between two groups were analyzed with unpaired 2-tailed Student's t-test (Fig.  
748 1A,C,D,E; Fig. 6H right graph; Fig. S4B,C) and those among multiple groups with one-  
749 way ANOVA followed by Tukey posthoc test (Fig. 2A; Fig. 6D,G,H left graph). All  
750 statistics were performed with GraphPad Prism software 7.05. Values of  $p \leq 0.05$  were  
751 considered statistically significant.

752 **Acknowledgements**

753 We thank Christine Roulin for technical assistance. We thank Damien De Bellis from the  
754 Electron Microscopy Platform of the University of Lausanne for EM section preparation  
755 and image acquisition. This work was supported by the Swiss National Science  
756 Foundation to DH (grant 31003A\_173000) and the German Research Foundation to DH  
757 (HO 5837/1-1) and TH (HA 2103/9-1).

758

759 **Competing interests**

760 The authors declare no competing interests.

761

762 **References**

- 763 Bähler, Martin, and Allen Rhoads. 2002. "Calmodulin signaling via the IQ motif." *FEBS*  
764 *Letters* 513 (1):107-113. doi: 10.1016/s0014-5793(01)03239-2.
- 765 Bracke, A., D. Hoogewijs, and S. Dewilde. 2018b. "Exploring three different expression  
766 systems for recombinant expression of globins: *Escherichia coli*, *Pichia pastoris*  
767 and *Spodoptera frugiperda*." *Anal Biochem* 543:62-70. doi:  
768 10.1016/j.ab.2017.11.027.
- 769 Bracke, An, Kris Peeters, Usha Punjabi, David Hoogewijs, and Sylvia Dewilde. 2018a.  
770 "A search for molecular mechanisms underlying male idiopathic infertility."  
771 *Reproductive BioMedicine Online* 36 (3):327-339. doi:  
772 10.1016/j.rbmo.2017.12.005.
- 773 Brown, Jason M., and George B. Witman. 2014. "Cilia and Diseases." *BioScience* 64  
774 (12):1126-1137. doi: 10.1093/biosci/biu174.
- 775 Burmester, T., and T. Hankeln. 2014. "Function and evolution of vertebrate globins."  
776 *Acta Physiol (Oxf)* 211 (3):501-514. doi: 10.1111/apha.12312.

- 777 Burmester, Thorsten, and Thomas Hankeln. 2009. "What is the function of  
778 neuroglobin?" *Journal of Experimental Biology* 212 (10):1423-1428. doi:  
779 10.1242/jeb.000729.
- 780 Clermont, Y., and C. P. Leblond. 1955. "Spermiogenesis of man, monkey, ram and other  
781 mammals as shown by the 'periodic acid-schiff' technique." *American Journal*  
782 *of Anatomy* 96 (2):229-253. doi: 10.1002/aja.1000960203.
- 783 Darde, Thomas A., Estelle Lecluze, Aurélie Lardenois, Isabelle Stévant, Nathan Alary,  
784 Frank Tüttelmann, Olivier Collin, Serge Nef, Bernard Jégou, Antoine D. Rolland,  
785 Frédéric Chalmel, and Janet Kelso. 2019. "The ReproGenomics Viewer: a multi-  
786 omics and cross-species resource compatible with single-cell studies for the  
787 reproductive science community." *Bioinformatics* 35 (17):3133-3139. doi:  
788 10.1093/bioinformatics/btz047.
- 789 Darde, Thomas A., Olivier Sallou, Emmanuelle Becker, Bertrand Evrard, Cyril  
790 Monjeaud, Yvan Le Bras, Bernard Jégou, Olivier Collin, Antoine D. Rolland,  
791 and Frédéric Chalmel. 2015. "The ReproGenomics Viewer: an integrative cross-  
792 species toolbox for the reproductive science community." *Nucleic Acids*  
793 *Research* 43 (W1):W109-W116. doi: 10.1093/nar/gkv345.
- 794 De Backer, Joey, Darko Maric, Matthias Bosman, Sylvia Dewilde, and David  
795 Hoogewijs. 2021. "A reliable set of reference genes to normalize oxygen-  
796 dependent cytoglobin gene expression levels in melanoma." *Scientific Reports*  
797 11 (1). doi: 10.1038/s41598-021-90284-6.
- 798 Dolat, Lee, Qicong Hu, and Elias T. Spiliotis. 2014. "Septin functions in organ system  
799 physiology and pathology." *Biological Chemistry* 395 (2):123-141. doi:  
800 10.1515/hsz-2013-0233.

- 801 Fainberg, Jonathan, and James A. Kashanian. 2019. "Recent advances in understanding  
802 and managing male infertility." *F1000Research* 8:670. doi:  
803 10.12688/f1000research.17076.1.
- 804 Free, M. J., G. A. Schluntz, and R. A. Jaffe. 1976. "Respiratory Gas Tensions in Tissues  
805 and Fluids of the Male Rat Reproductive Tract1." *Biology of Reproduction* 14  
806 (4):481-488. doi: 10.1095/biolreprod14.4.481.
- 807 Ghossoub, Rania, Qicong Hu, Marion Failler, Marie-Christine Rouyez, Benjamin  
808 Spitzbarth, Serge Mostowy, Uwe Wolfrum, Sophie Saunier, Pascale Cossart, W.  
809 James Nelson, and Alexandre Benmerah. 2013. "Septins 2, 7, and 9 and MAP4  
810 co-localize along the axoneme in the primary cilium and control ciliary length."  
811 *Journal of Cell Science* 126:2583-2594. doi: 10.1242/jcs.111377.
- 812 Green, Christopher Daniel, Qianyi Ma, Gabriel L. Manske, Adrienne Niederriter Shami,  
813 Xianing Zheng, Simone Marini, Lindsay Moritz, Caleb Sultan, Stephen J.  
814 Gurczynski, Bethany B. Moore, Michelle D. Tallquist, Jun Z. Li, and Saher Sue  
815 Hammoud. 2018. "A Comprehensive Roadmap of Murine Spermatogenesis  
816 Defined by Single-Cell RNA-Seq." *Developmental Cell* 46 (5):651-667.e10. doi:  
817 10.1016/j.devcel.2018.07.025.
- 818 Hermo, Louis, R. Marc Pelletier, Daniel G. Cyr, Charles E. Smith, and R. Marc Pelletier.  
819 2010a. "Surfing the wave, cycle, life history, and genes/proteins expressed by  
820 testicular germ cells. Part 1: Background to spermatogenesis, spermatogonia, and  
821 spermatocytes." *Microscopy Research and Technique* 73 (4):241-278. doi:  
822 10.1002/jemt.20783.
- 823 Hermo, Louis, R. Marc Pelletier, Daniel G. Cyr, Charles E. Smith, and R. Marc Pelletier.  
824 2010b. "Surfing the wave, cycle, life history, and genes/proteins expressed by  
825 testicular germ cells. Part 2: Changes in spermatid organelles associated with

826 development of spermatozoa." *Microscopy Research and Technique* 73 (4):279-  
827 319. doi: 10.1002/jemt.20787.

828 Hermo, Louis, R. Marc Pelletier, Daniel G. Cyr, Charles E. Smith, and R. Marc Pelletier.  
829 2010c. "Surfing the wave, cycle, life history, and genes/proteins expressed by  
830 testicular germ cells. Part 3: Developmental changes in spermatid flagellum and  
831 cytoplasmic droplet and interaction of sperm with the zona pellucida and egg  
832 plasma membrane." *Microscopy Research and Technique* 73 (4):320-363. doi:  
833 10.1002/jemt.20784.

834 Hermo, Louis, R. Marc Pelletier, Daniel G. Cyr, Charles E. Smith, and R. Marc Pelletier.  
835 2010d. "Surfing the wave, cycle, life history, and genes/proteins expressed by  
836 testicular germ cells. Part 4: Intercellular bridges, mitochondria, nuclear  
837 envelope, apoptosis, ubiquitination, membrane/voltage-gated channels,  
838 methylation/acetylation, and transcription factors." *Microscopy Research and  
839 Technique* 73 (4):364-408. doi: 10.1002/jemt.20785.

840 Hermo, Louis, R. Marc Pelletier, Daniel G. Cyr, Charles E. Smith, and R. Marc Pelletier.  
841 2010e. "Surfing the wave, cycle, life history, and genes/proteins expressed by  
842 testicular germ cells. Part 5: Intercellular junctions and contacts between germs  
843 cells and Sertoli cells and their regulatory interactions, testicular cholesterol, and  
844 genes/proteins associated with more than one germ cell generation." *Microscopy  
845 Research and Technique* 73 (4):409-494. doi: 10.1002/jemt.20786.

846 Hoogewijs, D., B. Ebner, F. Germani, F. G. Hoffmann, A. Fabrizius, L. Moens, T.  
847 Burmester, S. Dewilde, J. F. Storz, S. N. Vinogradov, and T. Hankeln. 2012.  
848 "Androglobin: a chimeric globin in metazoans that is preferentially expressed in  
849 Mammalian testes." *Mol Biol Evol* 29 (4):1105-1114. doi:  
850 10.1093/molbev/msr246.

- 851 Hu, Q., L. Milenkovic, H. Jin, M. P. Scott, M. V. Nachury, E. T. Spiliotis, and W. J.  
852 Nelson. 2010. "A Septin Diffusion Barrier at the Base of the Primary Cilium  
853 Maintains Ciliary Membrane Protein Distribution." *Science* 329 (5990):436-439.  
854 doi: 10.1126/science.1191054.
- 855 Ihara, Masafumi, Ayae Kinoshita, Shuichi Yamada, Hiromitsu Tanaka, Ai Tanigaki,  
856 Ayumi Kitano, Motohito Goto, Kazutoshi Okubo, Hiroyuki Nishiyama, Osamu  
857 Ogawa, Chiaki Takahashi, Shigeyoshi Itoharu, Yoshitake Nishimune, Makoto  
858 Noda, and Makoto Kinoshita. 2005. "Cortical Organization by the Septin  
859 Cytoskeleton Is Essential for Structural and Mechanical Integrity of Mammalian  
860 Spermatozoa." *Developmental Cell* 8 (3):343-352. doi:  
861 10.1016/j.devcel.2004.12.005.
- 862 Jégou, B., S. Sankararaman, A. D. Rolland, D. Reich, and F. Chalmel. 2017. "Meiotic  
863 Genes Are Enriched in Regions of Reduced Archaic Ancestry." *Molecular  
864 Biology and Evolution* 34 (8):1974-1980. doi: 10.1093/molbev/msx141.
- 865 Jeyaraj, D. Antony, Gail Grossman, and Peter Petrusz. 2003. *Reproductive Biology and  
866 Endocrinology* 1 (1):48. doi: 10.1186/1477-7827-1-48.
- 867 Jordan, M., A. Schallhorn, and F. M. Wurm. 1996. "Transfecting Mammalian Cells:  
868 Optimization of Critical Parameters Affecting Calcium-Phosphate Precipitate  
869 Formation." *Nucleic Acids Research* 24 (4):596-601. doi: 10.1093/nar/24.4.596.
- 870 Keppner, Anna, Ditte Andreasen, Anne-Marie Mérillat, Julie Bapst, Camille Ansermet,  
871 Qing Wang, Marc Maillard, Sumedha Malsure, Antoine Nobile, and Edith  
872 Hummler. 2015. "Epithelial Sodium Channel-Mediated Sodium Transport Is Not  
873 Dependent on the Membrane-Bound Serine Protease CAP2/Tmprss4." *Plos One*  
874 10 (8):e0135224. doi: 10.1371/journal.pone.0135224.

- 875 Keppner, Anna, Darko Maric, Miguel Correia, Teng Wei Koay, Ilaria M. C. Orlando,  
876 Serge N. Vinogradov, and David Hoogewijs. 2020. "Lessons from the post-  
877 genomic era: Globin diversity beyond oxygen binding and transport." *Redox*  
878 *Biology* 37:101687. doi: 10.1016/j.redox.2020.101687.
- 879 Keppner, Anna, Darko Maric, Chloé Sergi, Camille Ansermet, Damien De Bellis, Denise  
880 V. Kratschmar, Jérémie Canonica, Petra Klusonova, Robert A. Fenton, Alex  
881 Odermatt, Gilles Crambert, David Hoogewijs, and Edith Hummler. 2019.  
882 "Deletion of the serine protease CAP2/Tmprss4 leads to dysregulated renal water  
883 handling upon dietary potassium depletion." *Scientific Reports* 9 (1). doi:  
884 10.1038/s41598-019-55995-x.
- 885 Khawar, Muhammad Babar, Hui Gao, and Wei Li. 2019. "Mechanism of Acrosome  
886 Biogenesis in Mammals." *Frontiers in Cell and Developmental Biology* 7 (195).  
887 doi: 10.3389/fcell.2019.00195.
- 888 Kim, Moshe S., Carol D. Froese, Hong Xie, and William S. Trimble. 2012. "Uncovering  
889 Principles That Control Septin-Septin Interactions." *Journal of Biological*  
890 *Chemistry* 287 (36):30406-30413. doi: 10.1074/jbc.M112.387464.
- 891 Kinoshita, M. 2003. "Assembly of Mammalian Septins." *Journal of Biochemistry* 134  
892 (4):491-496. doi: 10.1093/jb/mvg182.
- 893 Kissel, Holger, Maria-Magdalena Georgescu, Sarit Larisch, Katia Manova, Gary R.  
894 Hunnicutt, and Hermann Steller. 2005. "The Sept4 Septin Locus Is Required for  
895 Sperm Terminal Differentiation in Mice." *Developmental Cell* 8 (3):353-364.  
896 doi: 10.1016/j.devcel.2005.01.021.
- 897 Koay, Teng Wei, Carina Osterhof, Ilaria M. C. Orlando, Anna Keppner, Daniel Andre,  
898 Schayan Yousefian, María Suárez Alonso, Miguel Correia, Robert Markworth,  
899 Johannes Schödel, Thomas Hankeln, and David Hoogewijs. 2021. "Androglobin



900 gene expression patterns and FOXJ1-dependent regulation indicate its functional  
901 association with ciliogenesis." *Journal of Biological Chemistry* 296:100291. doi:  
902 10.1016/j.jbc.2021.100291.

903 Kotaja, Noora, Sarah Kimmins, Stefano Brancorsini, Didier Hentsch, Jean-Luc Vonesch,  
904 Irwin Davidson, Martti Parvinen, and Paolo Sassone-Corsi. 2004. "Preparation,  
905 isolation and characterization of stage-specific spermatogenic cells for cellular  
906 and molecular analysis." *Nature Methods* 1 (3):249-254. doi:  
907 10.1038/nmeth1204-249.

908 Krishnamurthy, Hanumanthappa, Natalia Danilovich, Carlos R. Morales, and M. Ram  
909 Sairam. 2000. "Qualitative and Quantitative Decline in Spermatogenesis of the  
910 Follicle-Stimulating Hormone Receptor Knockout (FORKO) Mouse1." *Biology  
911 of Reproduction* 62 (5):1146-1159. doi: 10.1095/biolreprod62.5.1146.

912 Kuo, Yung-Che, Ying-Hung Lin, Hau-Inh Chen, Ya-Yun Wang, Yu-Wei Chiou, Hsi-  
913 Hui Lin, Hsien-An Pan, Ching-Ming Wu, Shih-Ming Su, Chao-Chin Hsu, and  
914 Pao-Lin Kuo. 2012. "SEPT12 mutations cause male infertility with defective  
915 sperm annulus." *Human Mutation* 33 (4):710-719. doi: 10.1002/humu.22028.

916 Kuo, Yung-Che, Yi-Ru Shen, Hau-Inh Chen, Ying-Hung Lin, Ya-Yun Wang, Yet-Ran  
917 Chen, Chia-Yih Wang, and Pao-Lin Kuo. 2015. "SEPT12 orchestrates the  
918 formation of mammalian sperm annulus by organizing SEPT12-7-6-2/-4 core  
919 complexes." *Journal of Cell Science* 128:923-934. doi: 10.1242/jcs.158998.

920 Levine, Hagai, Niels Jørgensen, Anderson Martino-Andrade, Jaime Mendiola, Dan  
921 Weksler-Derri, Irina Mindlis, Rachel Pinotti, and Shanna H. Swan. 2017.  
922 "Temporal trends in sperm count: a systematic review and meta-regression  
923 analysis." *Human Reproduction Update* 23 (6):646-659. doi:  
924 10.1093/humupd/dmx022.

- 925 Lin, Ying-Hung, Yung-Ming Lin, Ya-Yun Wang, I. Shing Yu, Yi-Wen Lin, Yun-Han  
926 Wang, Ching-Ming Wu, Hsien-An Pan, Shin-Chih Chao, Pauline H. Yen, Shu-  
927 Wha Lin, and Pao-Lin Kuo. 2009. "The Expression Level of Septin12 Is Critical  
928 for Spermiogenesis." *The American Journal of Pathology* 174 (5):1857-1868.  
929 doi: 10.2353/ajpath.2009.080955.
- 930 Lin, Yu-Hua, Chia-Yen Huang, Chih-Chun Ke, Ya-Yun Wang, Tsung-Hsuan Lai,  
931 Hsuan-Che Liu, Wei-Chi Ku, Chying-Chyuan Chan, and Ying-Hung Lin. 2020.  
932 "ACTN4 Mediates SEPT14 Mutation-Induced Sperm Head Defects."  
933 *Biomedicines* 8 (11):518. doi: 10.3390/biomedicines8110518.
- 934 Lukassen, S., E. Bosch, A. B. Ekici, and A. Winterpacht. 2018. "Characterization of  
935 germ cell differentiation in the male mouse through single-cell RNA  
936 sequencing." *Scientific Reports* 8 (1). doi: 10.1038/s41598-018-24725-0.
- 937 Mecklenburg, Jennifer M., and Brian P. Hermann. 2016. "Mechanisms Regulating  
938 Spermatogonial Differentiation." *Results Probl Cell Differ* 58:253-287. doi:  
939 10.1007/978-3-319-31973-5\_10.
- 940 Neto, Filipe Tenorio Lira, Phil Vu Bach, Bobby B. Najari, Philip S. Li, and Marc  
941 Goldstein. 2016. "Spermatogenesis in humans and its affecting factors."  
942 *Seminars in Cell & Developmental Biology* 59:10-26. doi:  
943 10.1016/j.semcd.2016.04.009.
- 944 Peruquetti, Rita Luiza. 2015. "Perspectives on mammalian chromatoid body research."  
945 *Animal Reproduction Science* 159:8-16. doi: 10.1016/j.anireprosci.2015.05.018.
- 946 Platts, Adrian E., David J. Dix, Hector E. Chemes, Kary E. Thompson, Robert Goodrich,  
947 John C. Rockett, Vanesa Y. Rawe, Silvina Quintana, Michael P. Diamond,  
948 Lillian F. Strader, and Stephen A. Krawetz. 2007. "Success and failure in human

- 949 spermatogenesis as revealed by teratozoospermic RNAs." *Human Molecular*  
950 *Genetics* 16 (7):763-773. doi: 10.1093/hmg/ddm012.
- 951 Randi, E. B., B. Vervaet, M. Tsachaki, E. Porto, S. Vermeulen, M. T. Lindenmeyer, L.  
952 T. T. Thuy, C. D. Cohen, O. Devuyst, A. D. Kistler, C. Szabo, N. Kawada, T.  
953 Hankeln, A. Odermatt, S. Dewilde, R. H. Wenger, and D. Hoogewijs. 2020. "The  
954 Antioxidative Role of Cytoglobin in Podocytes: Implications for a Role in  
955 Chronic Kidney Disease." *Antioxid Redox Signal* 32 (16):1155-1171. doi:  
956 10.1089/ars.2019.7868.
- 957 Randriamboavonjy, Voahanginirina, Johann Isaak, Amro Elgheznavy, Frank Pistrosch,  
958 Timo Frömel, Xiaoke Yin, Klaus Badenhoop, Heinrich Heide, Manuel Mayr, and  
959 Ingrid Fleming. 2012. "Calpain inhibition stabilizes the platelet proteome and  
960 reactivity in diabetes." *Blood* 120 (2):415-423. doi: 10.1182/blood-2011-12-  
961 399980.
- 962 Rappsilber, J., M. Mann, and Y. Ishihama. 2007. "Protocol for micro-purification,  
963 enrichment, pre-fractionation and storage of peptides for proteomics using  
964 StageTips." *Nat Protoc* 2 (8):1896-906. doi: 10.1038/nprot.2007.261.
- 965 Reyes, Juan G., Jorge G. Farias, Sebastián Henríquez-Olavarrieta, Eva Madrid, Mario  
966 Parraga, Andrea B. Zepeda, and Ricardo D. Moreno. 2012. "The Hypoxic  
967 Testicle: Physiology and Pathophysiology." *Oxidative Medicine and Cellular*  
968 *Longevity* 2012:1-15. doi: 10.1155/2012/929285.
- 969 Ribet, David, Serena Boscaini, Clothilde Cauvin, Martin Siguier, Serge Mostowy,  
970 Arnaud Echard, and Pascale Cossart. 2017. "SUMOylation of human septins is  
971 critical for septin filament bundling and cytokinesis." *Journal of Cell Biology*  
972 216 (12):4041-4052. doi: 10.1083/jcb.201703096.

- 973 Schörg, Alexandra, Sara Santambrogio, James L. Platt, Johannes Schödel, Maja T.  
974 Lindenmeyer, Clemens D. Cohen, Katrin Schrödter, David R. Mole, Roland H.  
975 Wenger, and David Hoogewijs. 2015. "Destruction of a distal hypoxia response  
976 element abolishes trans-activation of the *PAG1* gene mediated by HIF-independent  
977 chromatin looping." *Nucleic Acids Research* 43 (12):5810-5823. doi:  
978 10.1093/nar/gkv506.
- 979 Sellin, Mikael E., Linda Sandblad, Sonja Stenmark, Martin Gullberg, and Douglas R.  
980 Kellogg. 2011. "Deciphering the rules governing assembly order of mammalian  
981 septin complexes." *Molecular Biology of the Cell* 22 (17):3152-3164. doi:  
982 10.1091/mbc.e11-03-0253.
- 983 Shen, Y. R., H. Y. Wang, Y. C. Tsai, Y. C. Kuo, S. R. Wu, C. Y. Wang, and P. L. Kuo.  
984 2020. "The SEPT12 complex is required for the establishment of a functional  
985 sperm head-tail junction." *Molecular Human Reproduction* 26 (6):402-412. doi:  
986 10.1093/molehr/gaaa031.
- 987 Shen, Yi-Ru, Han-Yu Wang, Yung-Che Kuo, Shih-Chuan Shih, Chun-Hua Hsu, Yet-  
988 Ran Chen, Shang-Rung Wu, Chia-Yih Wang, and Pao-Lin Kuo. 2017. "SEPT12  
989 phosphorylation results in loss of the septin ring/sperm annulus, defective sperm  
990 motility and poor male fertility." *PLOS Genetics* 13 (3):e1006631. doi:  
991 10.1371/journal.pgen.1006631.
- 992 Shevchenko, A., H. Tomas, J. Havlis, J. V. Olsen, and M. Mann. 2006. "In-gel digestion  
993 for mass spectrometric characterization of proteins and proteomes." *Nat Protoc* 1  
994 (6):2856-60. doi: 10.1038/nprot.2006.468.
- 995 Sigg, Monika Abedin, Tabea Menchen, Chanjae Lee, Jeffery Johnson, Melissa K.  
996 Jungnickel, Semil P. Choksi, Galo Garcia, Henriette Busengdal, Gerard W.  
997 Dougherty, Petra Pennekamp, Claudius Werner, Fabian Rentzsch, Harvey M.

- 998 Florman, Nevan Krogan, John B. Wallingford, Heymut Omran, and Jeremy F.  
999 Reiter. 2017. "Evolutionary Proteomics Uncovers Ancient Associations of Cilia  
1000 with Signaling Pathways." *Developmental Cell* 43 (6):744-762.e11. doi:  
1001 10.1016/j.devcel.2017.11.014.
- 1002 Sirajuddin, M., M. Farkasovsky, E. Zent, and A. Wittinghofer. 2009. "GTP-induced  
1003 conformational changes in septins and implications for function." *Proceedings of*  
1004 *the National Academy of Sciences* 106 (39):16592-16597. doi:  
1005 10.1073/pnas.0902858106.
- 1006 Sirajuddin, Minhajuddin, Marian Farkasovsky, Florian Hauer, Dorothee Kühlmann, Ian  
1007 G. Macara, Michael Weyand, Holger Stark, and Alfred Wittinghofer. 2007.  
1008 "Structural insight into filament formation by mammalian septins." *Nature* 449  
1009 (7160):311-315. doi: 10.1038/nature06052.
- 1010 Skarnes, William C., Barry Rosen, Anthony P. West, Manousos Koutsourakis, Wendy  
1011 Bushell, Vivek Iyer, Alejandro O. Mujica, Mark Thomas, Jennifer Harrow, Tony  
1012 Cox, David Jackson, Jessica Severin, Patrick Biggs, Jun Fu, Michael Nefedov,  
1013 Pieter J. de Jong, A. Francis Stewart, and Allan Bradley. 2011. "A conditional  
1014 knockout resource for the genome-wide study of mouse gene function." *Nature*  
1015 474 (7351):337-342. doi: 10.1038/nature10163.
- 1016 Spiliotis, Elias T., and Konstantinos Nakos. 2021. "Cellular functions of actin- and  
1017 microtubule-associated septins." *Current Biology* 31 (10):R651-R666. doi:  
1018 10.1016/j.cub.2021.03.064.
- 1019 Storti, F., S. Santambrogio, L. M. Crowther, T. Otto, I. Abreu-Rodriguez, M. Kaufmann,  
1020 C. J. Hu, C. Dame, J. Fandrey, R. H. Wenger, and D. Hoogewijs. 2014. "A novel  
1021 distal upstream hypoxia response element regulating oxygen-dependent

- 1022 erythropoietin gene expression." *Haematologica* 99 (4):e45-e48. doi:  
1023 10.3324/haematol.2013.102707.
- 1024 Strajhar, P., Y. Schmid, E. Liakoni, P. C. Dolder, K. M. Rentsch, D. V. Kratschmar, A.  
1025 Odermatt, and M. E. Liechti. 2016. "Acute Effects of Lysergic Acid  
1026 Diethylamide on Circulating Steroid Levels in Healthy Subjects." *J*  
1027 *Neuroendocrinol* 28 (3):12374. doi: 10.1111/jne.12374.
- 1028 Sun, P., H. Enslen, P. S. Myung, and R. A. Maurer. 1994. "Differential activation of  
1029 CREB by Ca<sup>2+</sup>/calmodulin-dependent protein kinases type II and type IV  
1030 involves phosphorylation of a site that negatively regulates activity." *Genes Dev*  
1031 8 (21):2527-39. doi: 10.1101/gad.8.21.2527.
- 1032 Toure, Aminata, Baptiste Rode, Gary R. Hunnicutt, Denise Escalier, and Gérard Gacon.  
1033 2011. "Septins at the annulus of mammalian sperm." *Biological Chemistry* 392  
1034 (8-9):799-803. doi: 10.1515/bc.2011.074.
- 1035 Tyanova, S., T. Temu, and J. Cox. 2016. "The MaxQuant computational platform for  
1036 mass spectrometry-based shotgun proteomics." *Nat Protoc* 11 (12):2301-2319.  
1037 doi: 10.1038/nprot.2016.136.
- 1038 Villalobo, Antonio, María González-Muñoz, and Martin W. Berchtold. 2019. "Proteins  
1039 with calmodulin-like domains: structures and functional roles." *Cellular and*  
1040 *Molecular Life Sciences* 76 (12):2299-2328. doi: 10.1007/s00018-019-03062-z.
- 1041 Villalobo, Antonio, Hiroaki Ishida, Hans J. Vogel, and Martin W. Berchtold. 2018.  
1042 "Calmodulin as a protein linker and a regulator of adaptor/scaffold proteins."  
1043 *Biochimica et Biophysica Acta (BBA) - Molecular Cell Research* 1865 (3):507-  
1044 521. doi: 10.1016/j.bbamcr.2017.12.004.
- 1045 Wang, Mei, Xixi Liu, Gang Chang, Yidong Chen, Geng An, Liying Yan, Shuai Gao,  
1046 Yanwen Xu, Yueli Cui, Ji Dong, Yuhan Chen, Xiaoying Fan, Yuqiong Hu, Ke

1047 Song, Xiaohui Zhu, Yun Gao, Zhaokai Yao, Shuhui Bian, Yu Hou, Jiahao Lu,  
1048 Rui Wang, Yong Fan, Ying Lian, Wenhao Tang, Yapeng Wang, Jianqiao Liu,  
1049 Lianming Zhao, Luyu Wang, Zhaoting Liu, Renpei Yuan, Yujia Shi, Boqiang  
1050 Hu, Xiulian Ren, Fuchou Tang, Xiao-Yang Zhao, and Jie Qiao. 2018. "Single-  
1051 Cell RNA Sequencing Analysis Reveals Sequential Cell Fate Transition during  
1052 Human Spermatogenesis." *Cell Stem Cell* 23 (4):599-614. doi:  
1053 10.1016/j.stem.2018.08.007.

1054 Wang, Ya-Yun, Tsung-Hsuan Lai, Mei-Feng Chen, Hui-Ling Lee, Pao-Lin Kuo, and  
1055 Ying-Hung Lin. 2019. "SEPT14 Mutations and Teratozoospermia: Genetic  
1056 Effects on Sperm Head Morphology and DNA Integrity." *Journal of Clinical  
1057 Medicine* 8 (9):1297. doi: 10.3390/jcm8091297.

1058

**Fig.1**

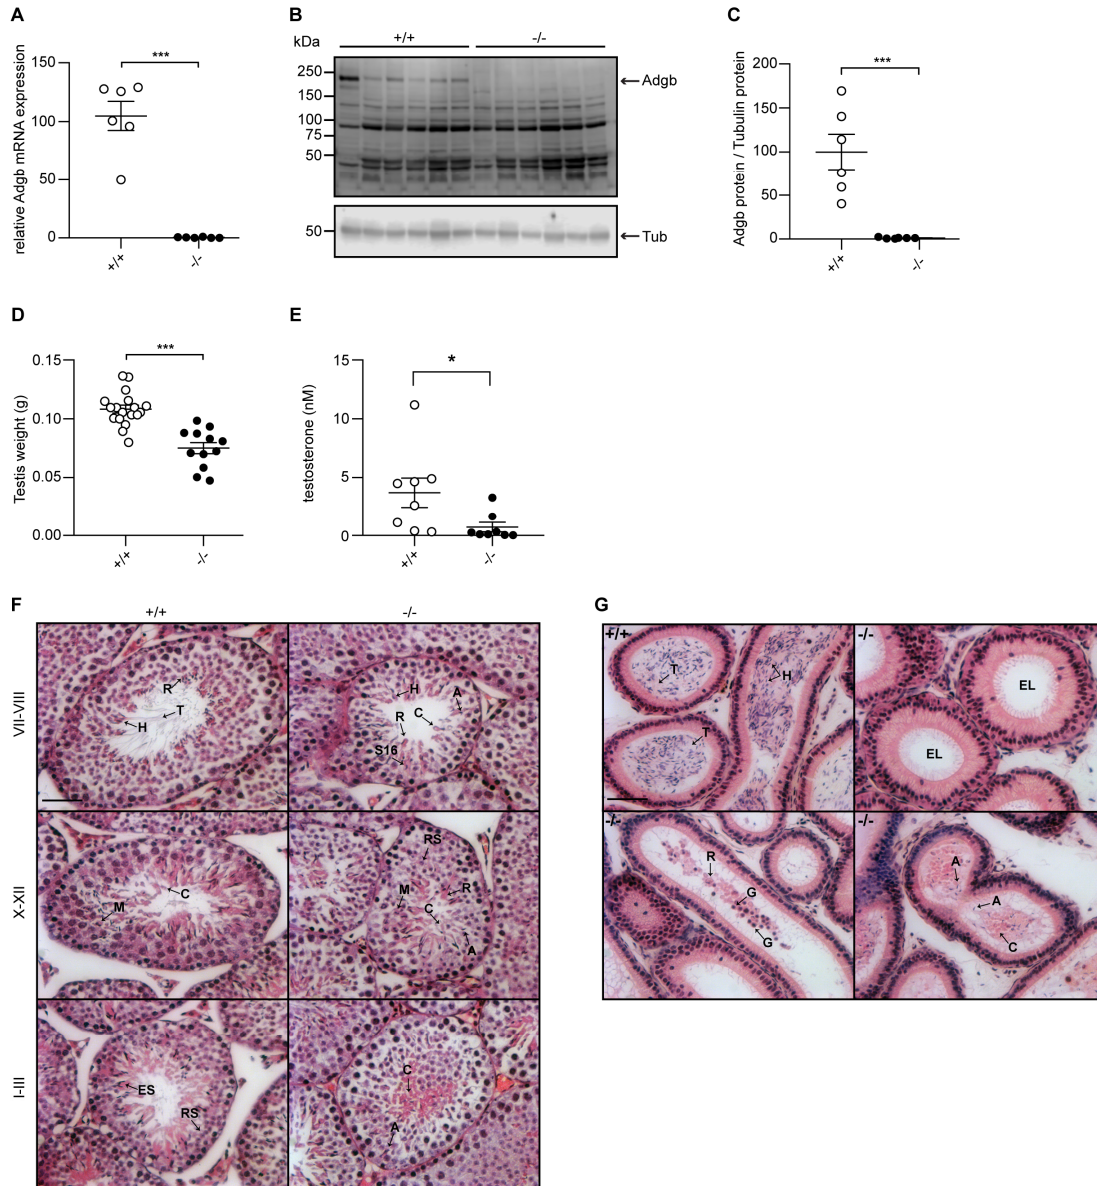

**Figure 1. Validation of the knockout model and testicular phenotype.**

(A) Relative mRNA expression levels of Adgb in testes of wildtype (+/+) and knockout mice (-/-) (n=6 per genotype; p=0.000008). (B) Representative immunoblot for Adgb in testis lysates from wildtype (+/+) and knockout mice (-/-) (n=6 per genotype) and (C) corresponding protein quantification. Tubulin was used as loading control. p=0.0007. (D) Testis weight (g) in Adgb wildtype (+/+), heterozygous (+/-) and knockout (-/-) mice (n=8-13 per genotype). p=0.000003. (E) Serum testosterone levels (nM) in Adgb wildtype (+/+) and knockout (-/-) mice (n=8 per genotype). p=0.041. (F) Representative hematoxylin and eosin (H&E) stained sections of testes from Adgb wildtype (+/+) and knockout mice (-/-) at the different stages of spermatogenesis. Heads (H), tails (T), residual bodies (R) cytoplasmic bulges (C), meiosis (M), elongating spermatids (ES), round spermatids (RS), stage 16 spermatids (S16) and abnormal heads (A) are indicated. Scale bar represents 50  $\mu$ m. (G) Representative H&E stained sections of epididymides from Adgb wildtype (+/+) and knockout mice (-/-). Heads (H), tails (T), cytoplasmic bodies (C),



residual bodies (R), germ cells (G), abnormal heads (A) are shown. Note the empty lumen (EL) in knockout mice. Scale bar represents 50  $\mu\text{m}$ . \*\*  $p < 0.01$ , \*\*\*  $p < 0.001$ .

**Fig.2**

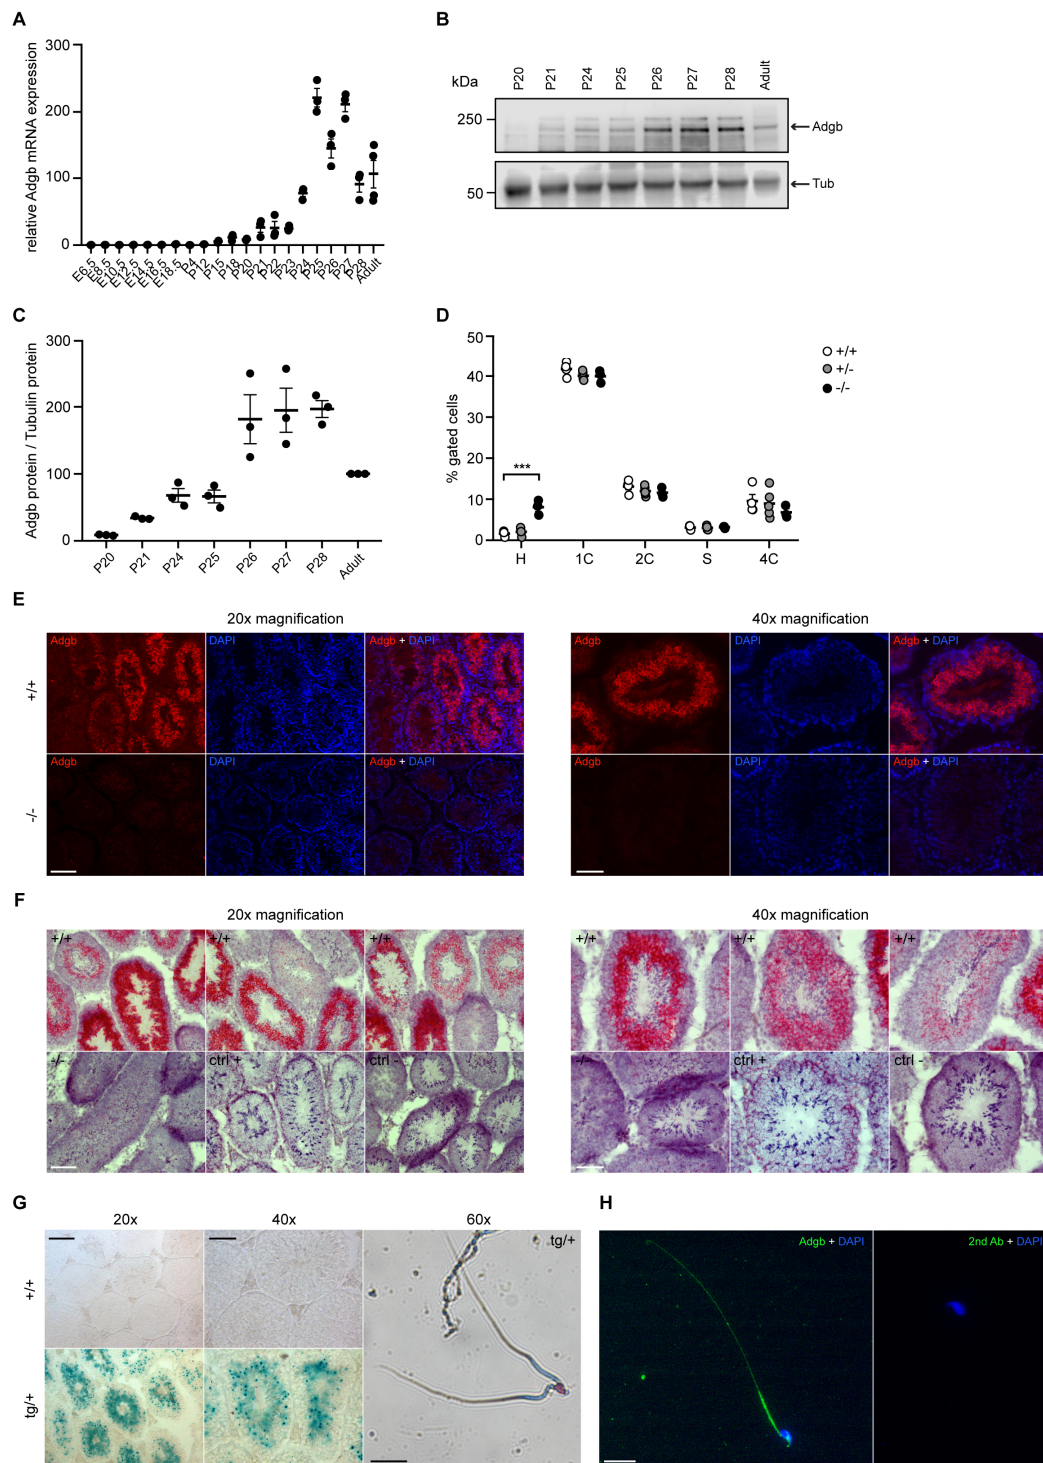

**Figure 2. Testicular Adgb expression pattern and localization.**

(A) Relative mRNA expression levels of Adgb in testes of wildtype mice during embryonic development (E) and early post-natal (P) life (n=3-4 per condition). (B) Representative immunoblot for Adgb in testis lysates from wildtype mice at different post-natal (P) ages (n=3 per condition) and (C) corresponding protein quantification. Tubulin was used as loading control. (D) Flow cytometric analysis of spermatogenic cell populations following propidium iodide staining in Adgb wildtype (+/+, white circles, n=4), heterozygous (+/-, grey circles, n=5) and knockout (-/-, black

circles, n=3) testes. H: elongating and elongated spermatids; 1C: round spermatids; 2C: spermatogonia, secondary spermatocytes, testicular somatic cells; S: spermatogonia synthesizing DNA; 4C: primary spermatocytes.  $p=0.00024$ . **(E)** Representative pictures of Adgb protein (red fluorescence) detection in testes of wildtype (+/+) and knockout (-/-) animals. Left panels 20x magnification, right panels 40x magnification, scale bars represent 100  $\mu\text{m}$  and 50  $\mu\text{m}$ , respectively. Nuclei were stained with DAPI. **(F)** Representative pictures of Adgb mRNA *in situ* hybridization in testes from wildtype (+/+) and knockout (-/-) animals. Left panels 20x magnification; right panels, 40x magnification; scale bars represent 100  $\mu\text{m}$  and 50  $\mu\text{m}$ , respectively. Positive (ctrl +, PPIB) and negative (ctrl -, DapB) control sections are shown. **(G)** Representative pictures of b-galactosidase activity (X-gal staining) in testes from Tm1b wildtype (+/+) and Tm1b heterozygous (tg/+) mice, and isolated spermatozoa from Tm1b heterozygous (tg/+) mice. Left panels, 20x magnification; middle panels, 40x magnification; right panel, 60x magnification; scale bars represent 100  $\mu\text{m}$ , 50  $\mu\text{m}$  and 20  $\mu\text{m}$ , respectively. Spermatozoa were counterstained with nuclear fast red. **(H)** Representative picture of Adgb protein (green fluorescence) in a single spermatozoon from wildtype (+/+) mice (left panel), and negative control (secondary antibody only, right panel). Scale bar represents 20  $\mu\text{m}$ , nuclei were stained with DAPI. \*\*  $p < 0.001$ .

**Fig.3**

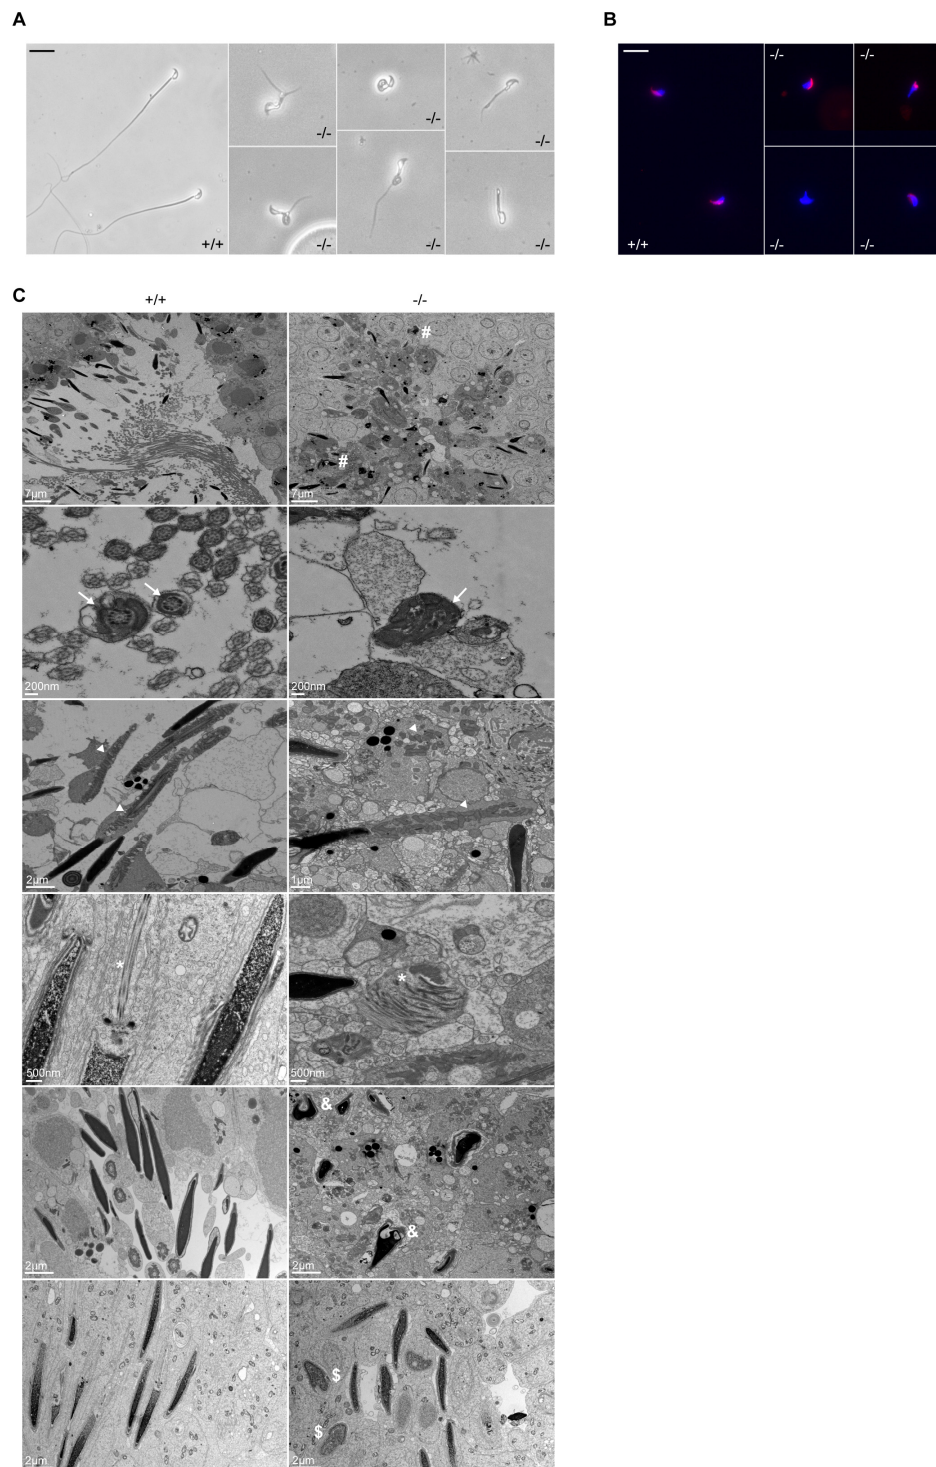

**Figure 3. Defective spermatogenesis is associated with flagellar malformation in Adgb knockout mice.**

(A) Representative pictures of cauda epididymis sperm from wildtype (+/+) and Adgb knockout animals (-/-). Scale bar represents 20  $\mu$ m. (B) Representative pictures of PNA-stained cauda epididymis sperm from wildtype (+/+) and Adgb knockout animals (-/-). Nuclei were stained with DAPI. Scale bar represents 20  $\mu$ m. (C) Representative TEM pictures from wildtype (+/+, left panels) and knockout (-/-, right panels) testes. Misshaped sperm heads (hash), axonemes (arrows),

mitochondria (arrowheads) and microtubules (asterisks), nuclear inclusions (ampersand), and abnormal manchette elongation (dollar) are shown. Scale bar lengths are indicated on each picture.

**Fig.4**

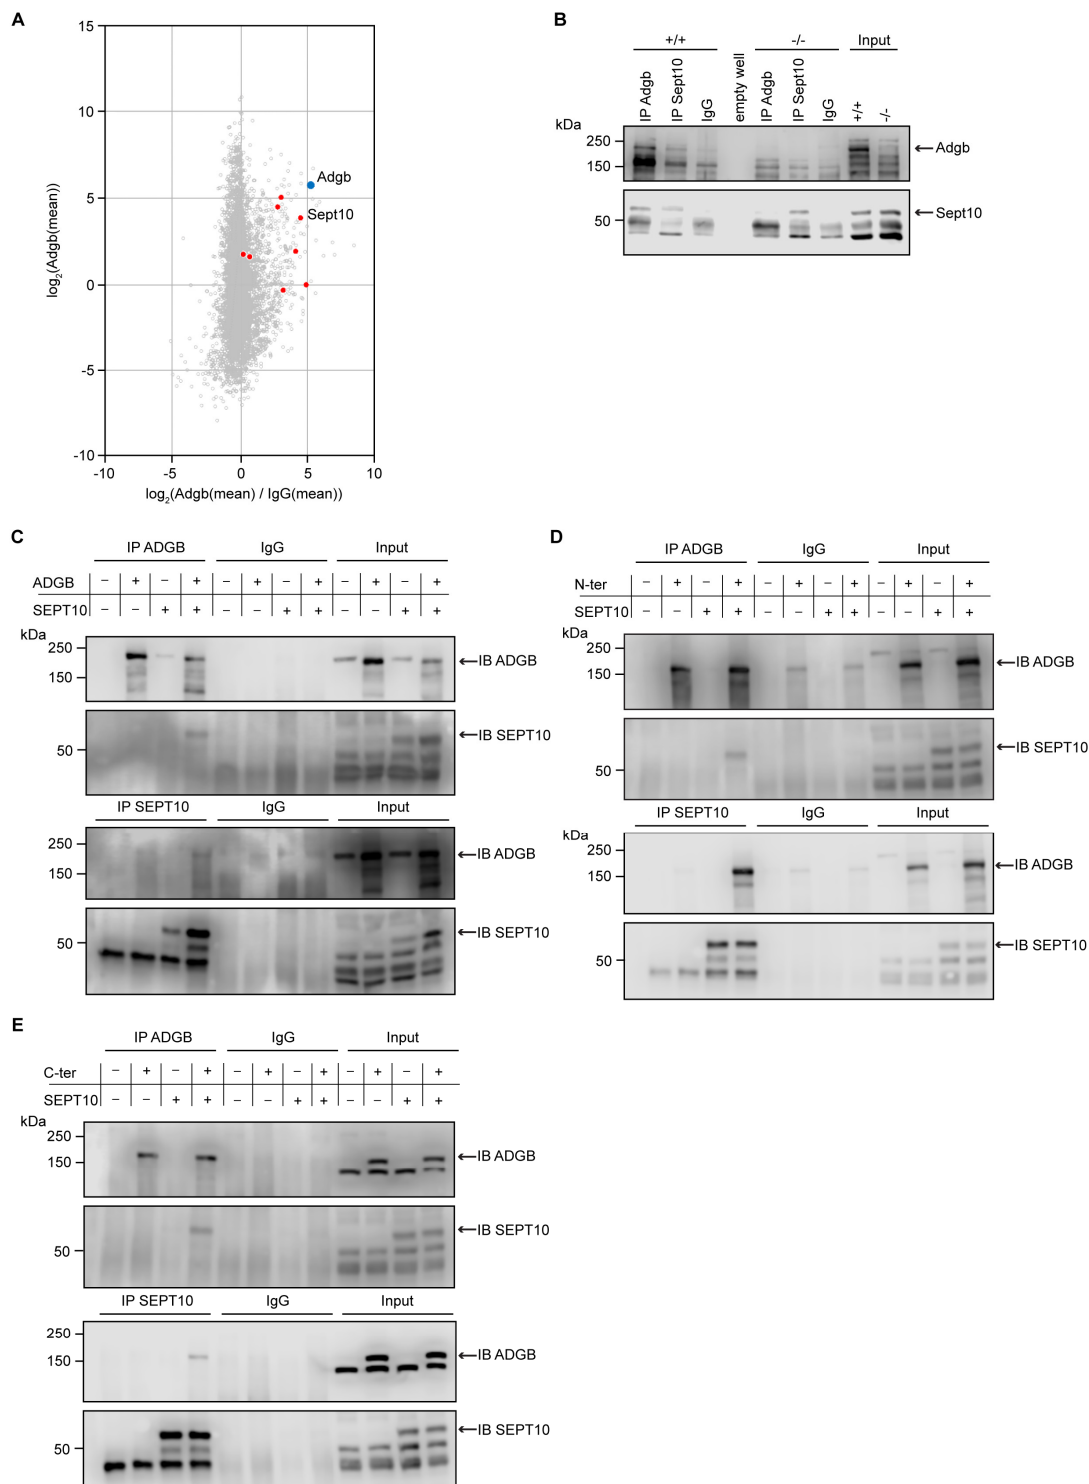

**Figure 4. Adgb and Sept10 interact *in vivo* and *in vitro*.**

(A) Proteins of the septin family are specifically enriched in the Adgb immuno-precipitation (IP). The iBAQ (intensity-based absolute quantification) values of each Adgb IP (triplicate) and IgG control IP (duplicate) were log<sub>2</sub> transformed and normalized against the median value. Missing values were imputed before the mean values of the Adgb and IgG control IPs were calculated. The normalized abundance of each protein detected in the Adgb IP (log<sub>2</sub> Adgb (mean)) is plotted against its specific enrichment compared to the IgG control IP (log<sub>2</sub> (Adgb

(mean) / IgG (mean)). Adgb and septins are highlighted as blue and red dots, respectively, in the christmas tree plot representation. **(B)** Representative immunoblot of Adgb and Sept10 in testis lysates from wildtype (+/+) and knockout (-/-) mice following co-immunoprecipitation of Adgb and Sept10. **(C-E)** Representative immunoblots of ADGB and Sept10 in protein lysates of HEK293 cells (co-)transfected with full-length ADGB **(C)**, N-ter ADGB **(D)** and C-ter ADGB **(E)** and Sept10 following co-immunoprecipitation of ADGB and Sept10.

**Fig.5**

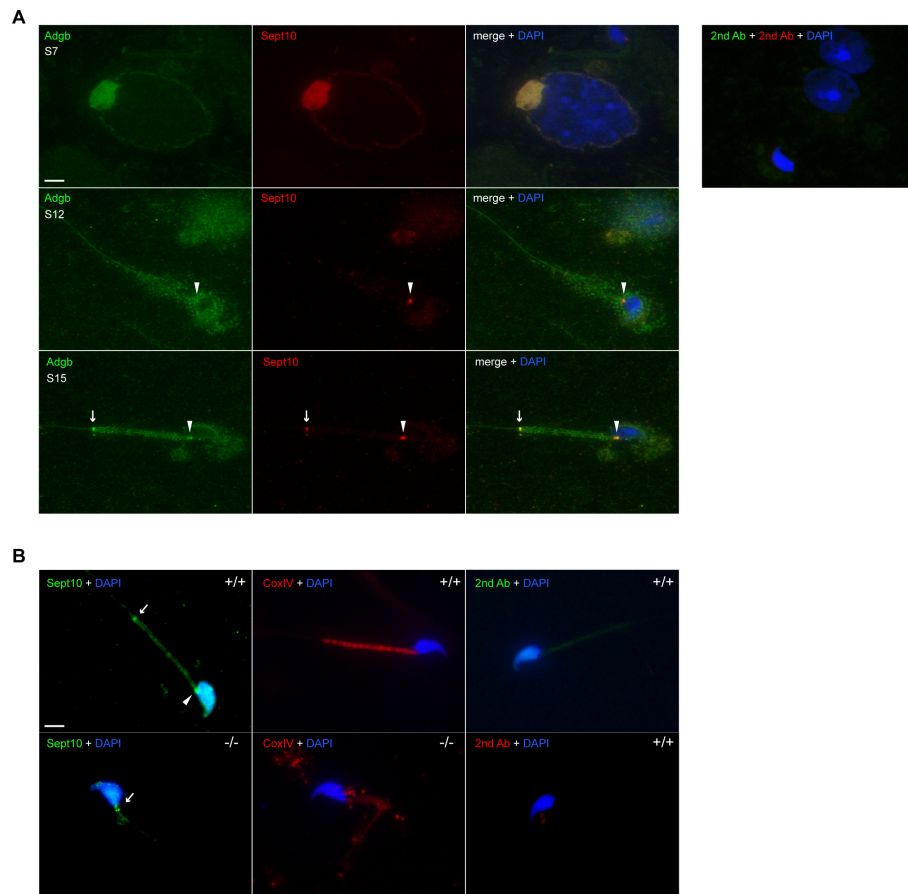

**Figure 5. Adgb and Sept10 co-localize in developing acrosome, sperm neck and annulus.**

(A) Representative pictures of Adgb protein (green fluorescence) and Sept10 (red fluorescence) in elongating spermatids (stage 7 [S7] upper panels, stage 12 [S12] middle panels, and stage 15 [S15] lower panels) after stage-specific tubule dissection of wildtype testes. Nuclei were stained with DAPI. Negative control (secondary antibodies only) is shown on the right. Scale bar represents 10  $\mu$ m. Sperm neck (arrowhead) and annulus (arrow) are highlighted. (B) Representative pictures of Sept10 (left panels, green fluorescence) and CoxIV (middle panels, red fluorescence) proteins in wildtype (+/+) and knockout (-/-) epididymal sperm. Sections were counterstained with DAPI. Negative control (secondary antibodies only) are shown (right panels). Scale bar represents 10  $\mu$ m.



**Fig.6**

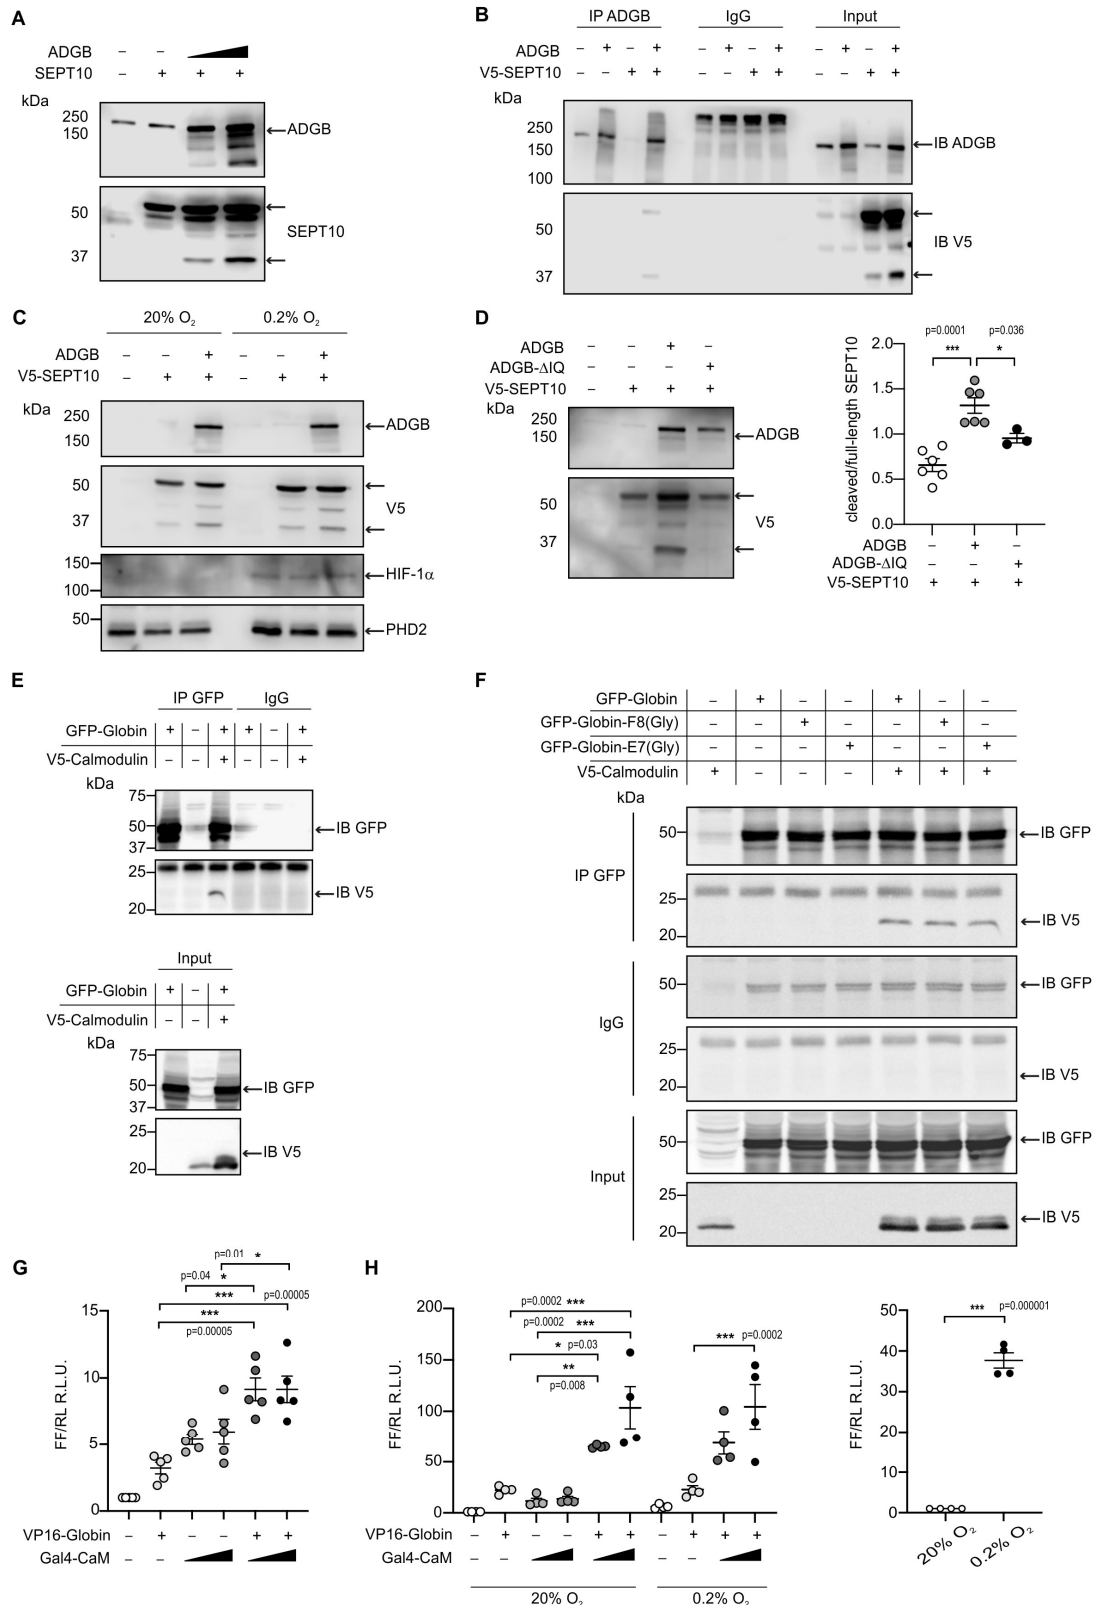

**Figure 6. Adgb contributes to *in vitro* CaM-dependent Sept10 cleavage.**

(A) Representative immunoblots of ADGB and SEPT10 in protein lysates of HEK293 cells co-transfected with plasmids encoding SEPT10 and two dose-dependent amounts of full-length ADGB. (B) Representative immunoblot of ADGB and V5 in protein lysates of HEK293 cells

(co-)transfected with full-length ADGB and a C-terminally V5-tagged SEPT10 construct following co-immunoprecipitation of ADGB and V5-SEPT10. **(C)** Representative immunoblots of ADGB, V5, HIF-1 $\alpha$  and PHD2 in protein lysates of HEK293 cells (co-)transfected with full-length ADGB and V5-SEPT10 following exposure to normoxic (20% O<sub>2</sub>) and hypoxic conditions (0.2% O<sub>2</sub>) for 24 hours. HIF-1 $\alpha$  and PHD2 were used as positive controls for hypoxia. **(D)** Representative immunoblot of ADGB and V5 in protein lysates of HEK293 cells (co-)transfected with full-length ADGB, V5-SEPT10 and an ADGB-IQ deletion mutant, and corresponding protein quantification of cleaved/full-size SEPT10 ratio (n=3-6 independent experiments). Ponceau S protein staining was used as loading control. **(E)** Representative immunoblot of GFP and V5 in protein lysates of HEK293 cells (co-)transfected with a truncated construct of the globin domain of ADGB (spanning the IQ domain) (GFP-Globin) and a V5-tagged CaM (V5-Calmodulin) following immunoprecipitation of GFP. **(F)** Representative immunoblot of GFP and V5 in protein lysates of HEK293 cells (co-)transfected with GFP-Globin, a GFP-Globin construct with mutation of the proximal heme-binding histidine (GFP-Globin-F8(Gly)), a GFP-Globin construct with mutation of the distal glutamine (GFP-Globin-E7(Gly)) and V5-CaM following immunoprecipitation of GFP. **(G, H)** Mammalian-2 hybrid assays in HEK293 cells under normoxic conditions **(G)** and A375 cells under normoxic and hypoxic (0.2% O<sub>2</sub>) conditions **(H)** (n=3-5 independent experiments). HEK293 and A375 cells were transiently transfected with fusion protein vectors based on a Gal4 DNA binding domain fused to calmodulin (Gal4-CaM) and a VP16 activation domain fused to the ADGB globin domain comprising the IQ domain (VP16-Globin), a Gal4 response element-driven firefly luciferase reporter, and a *Renilla* luciferase control vector. Increasing transfection amounts for the Gal4-CaM fusion protein were employed. Following transfection, A375 cells were incubated under normoxic (20% O<sub>2</sub>) or hypoxic (0.2% O<sub>2</sub>) conditions, and luciferase reporter gene activities were determined 24 hours later. Single construct transfections served as negative controls. The single Gal4-CaM control condition is not displayed in A375 cells exposed to hypoxia, due to its hypoxic regulation. An Epo hypoxia response element-driven firefly luciferase construct served as hypoxic control. \* p< 0.05, \*\* p< 0.01, \*\*\* p< 0.001.

## Supplementary Information for

### **Androglobin, a chimeric mammalian globin, is required for male fertility.**

Anna Keppner<sup>1</sup>, Miguel Correia<sup>1</sup>, Sara Santambrogio<sup>2</sup>, Teng Wei Koay<sup>1</sup>, Darko Maric<sup>1</sup>,  
Carina Osterhof<sup>3</sup>, Denise V Winter<sup>4</sup>, Angèle Clerc<sup>1</sup>, Michael Stumpe<sup>5</sup>, Frédéric Chalmel<sup>6</sup>,  
Sylvia Dewilde<sup>7</sup>, Alex Odermatt<sup>4</sup>, Dieter Kressler<sup>5</sup>, Thomas Hankeln<sup>3</sup>, Roland H.  
Wenger<sup>2</sup>, David Hoogewijs<sup>1\*</sup>

<sup>1</sup> Section of Medicine, Department of Endocrinology, Metabolism and Cardiovascular system (EMC), University of Fribourg, Switzerland; <sup>2</sup> Institute of Physiology, University of Zurich, Switzerland; <sup>3</sup> Institute for Organismic and Molecular Evolutionary Biology, University of Mainz, Germany; <sup>4</sup> Department of Pharmaceutical Sciences, University of Basel, Switzerland, <sup>5</sup> Department of Biology, University of Fribourg, Switzerland, <sup>6</sup> University of Rennes, Inserm, EHESP, Irset (Institut de recherche en santé, environnement et travail) - UMR\_S 1085, France, <sup>7</sup> Department of Biomedical Sciences, University of Antwerp, Belgium

\*Corresponding author: David Hoogewijs  
Email: [david.hoogewijs@unifr.ch](mailto:david.hoogewijs@unifr.ch)

### **This section includes:**

Figures S1 to S10  
Tables S1 to S2  
Legends for datasets S1 to S3  
SI References  
Source data files are provided for Figures 1, 2, 4B, 4C, 4D, 4E, 6A, 6B, 6C, 6D, 6E, 6F, S1, S5A, 5B, S5C, S5D, S5E, S5F, S5G, S6, S7, S8, S10

### **Other supplementary materials for this manuscript include the following:**

Datasets S1 to S3

**Fig.S1**

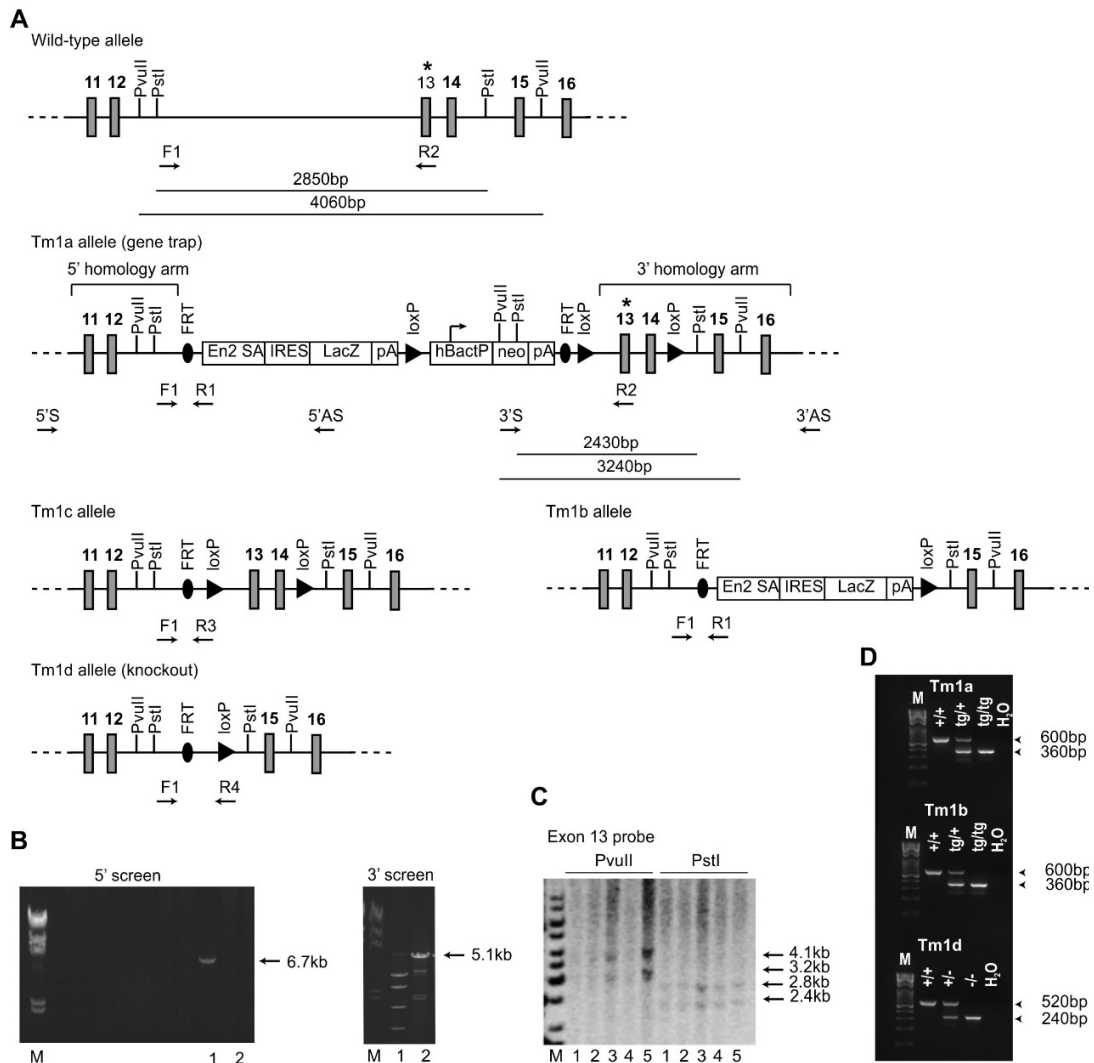

**Figure S1. Generation of *Adgb* knockout mice.** (A) Schematic representation of the wild-type, Tm1a (gene-trap), Tm1b (following breeding with Cre-deleter mice), Tm1c (following breeding with Flp-deleter mice) and Tm1d (knockout) (following breeding of Tm1c mice with Cre-deleter mice) alleles. The position of the probe (asterisk), the primers (5'S, 5'AS, 3'S and 3'AS) and restriction sites for the ES cell screening by PCR and Southern blot are shown. FRT sites flank the gene-trap construct, containing the lacZ gene and the neomycin resistance cassette (neo), whereas loxP sites flank the neo-cassette and exons 13 and 14 of the *Adgb* gene. Position of the PCR primers for the genotyping of the different mouse lines are shown (F1 and R1-4). (B) Representative PCR-based analysis of targeted ES cells using primers 5'S and 5'AS (left panel) (M: marker, 1 and 2: positive and negative clones respectively), and primers 3'S and 3'AS (right panel) (M: marker, 1 and 2: negative and positive clones respectively). (C) Southern blot analysis of targeted ES cell clones using the exon 13 probe (asterisk) and following digestion with *PvuII* and *PstI* (M: marker, 1-5: different clones tested positive for both 5' and 3' PCR reactions). (D) Genotyping of Tm1a wild-type (+/+),

heterozygous (tg/+) and homozygous (tg/tg) mice (upper panel), M: marker, Tm1b wild-type (+/+), heterozygous (tg/+) and homozygous (tg/tg) mice (middle panel), and Tm1d wild-type (+/+), heterozygous (+/-) and homozygous (-/-, knockout) mice (lower panel).

**Fig.S2**

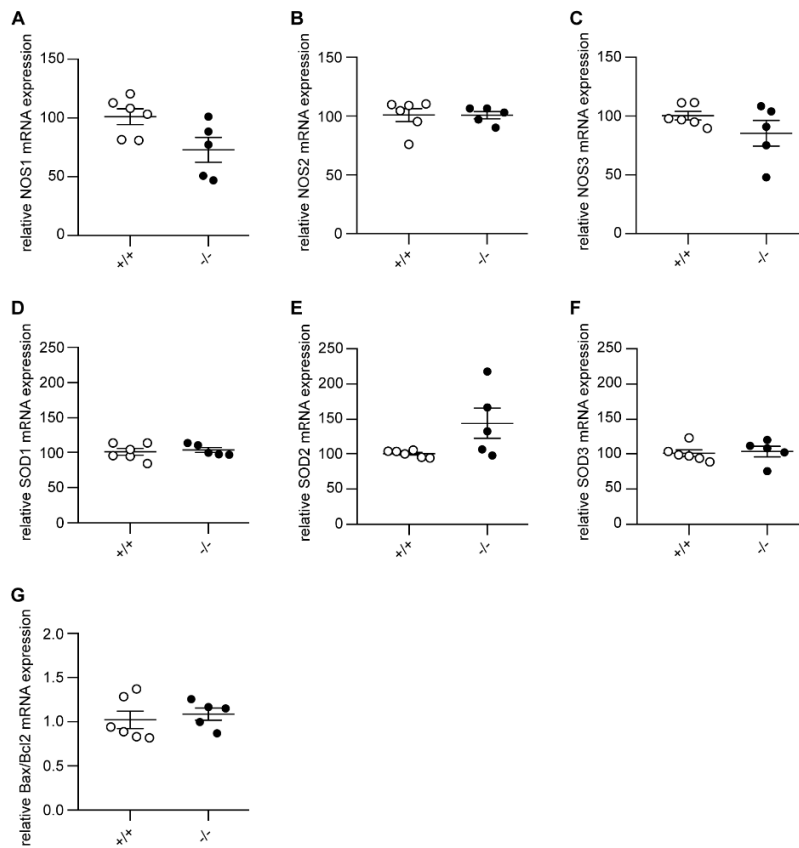

**Figure S2. Adgb KO mice do not display changes in NOS, SOD and apoptotic gene expression.** Relative mRNA expression levels of (A) NOS1, (B) NOS2, (C) NOS3, (D) SOD1, (E) SOD2, (F) SOD3, and (G) ratio of Bax and Bcl2 in testis lysates from Adgb wildtype (+/+, n=6) and knockout (-/-, n=5) mice.

**Fig.S3**

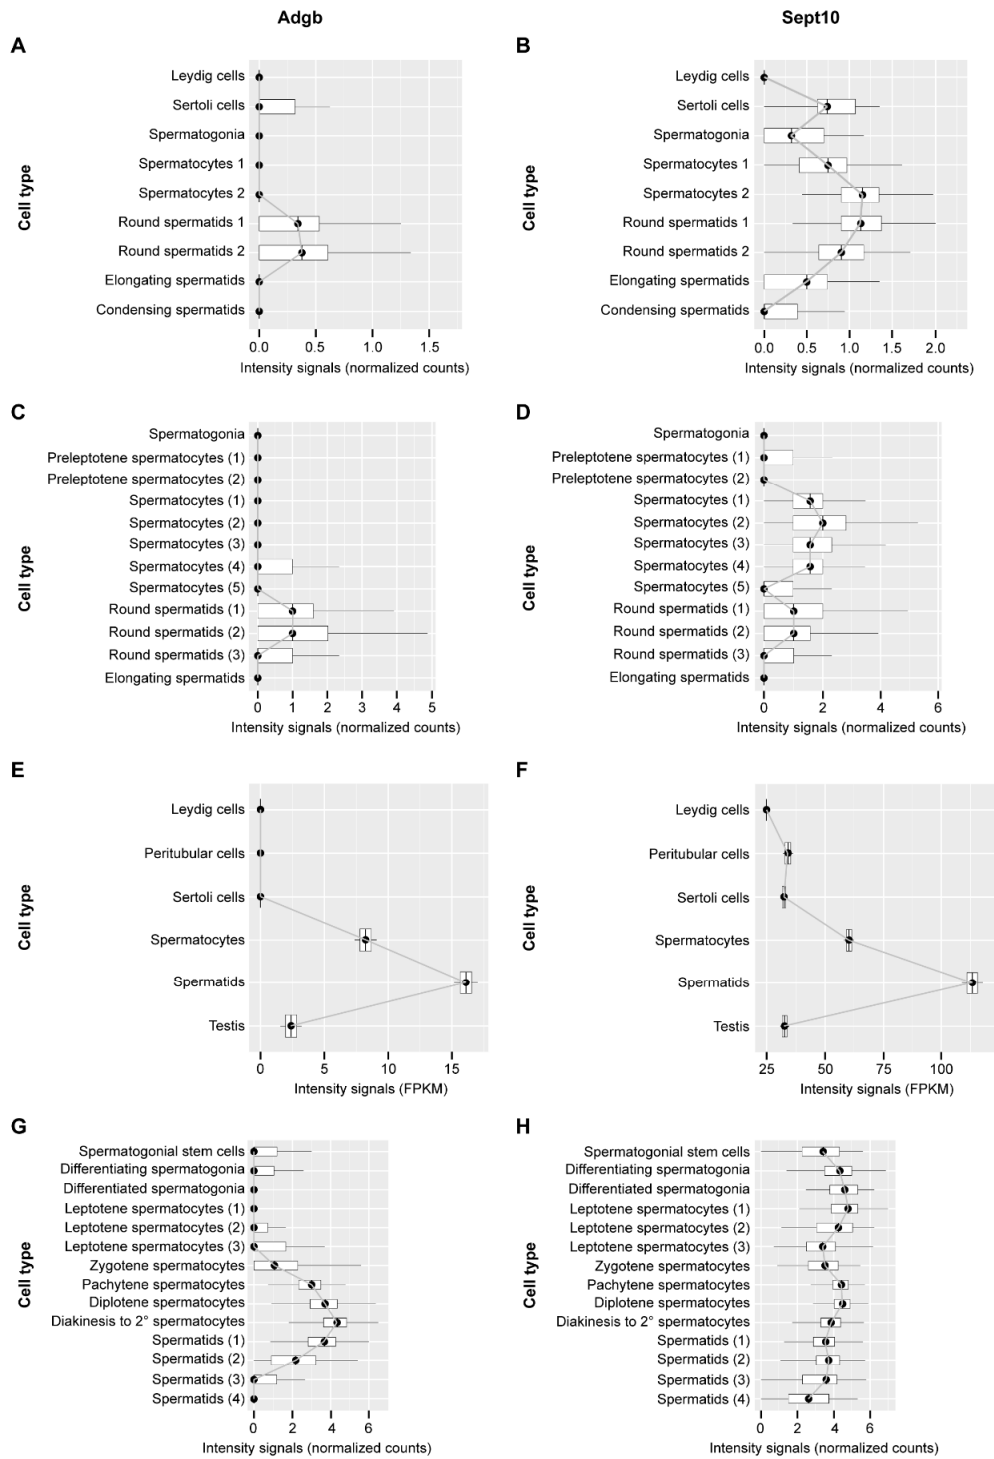

**Figure S3. Temporal Adgb and Sept10 expression profiles based on single-cell and bulk RNA-seq datasets. (A, C, E, G): Adgb; (B, D, F, H): Sept10. Data were obtained from Lukassen et al. 2018 (mouse, panels A and B), Green et al. 2018 (mouse, panels C and D), Jégou et al. 2017 (human, panels E and F), and Wang et al.**

2018 (human, panels G and H), respectively (Green et al. 2018, Jégou et al. 2017, Lukassen et al. 2018, Wang et al. 2018).



Fig.S4

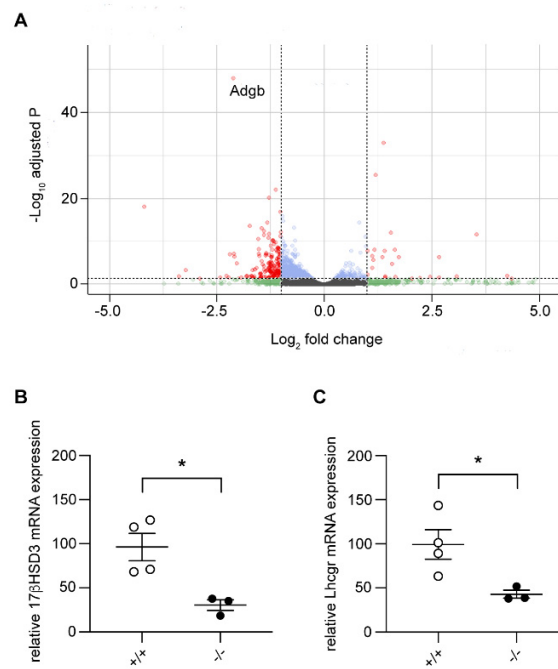

**Figure S4. Volcano plot of differentially expressed genes in Adgb knockout mice testis samples and validation by RT-qPCR.** (A) X-axis represents the log<sub>2</sub> fold change and y-axis represents log<sub>10</sub> of the adjusted P-value. Genes are assigned with specific colors after DESeq2 analysis: gray (not significant [NS]), green (|Log<sub>2</sub>FC| > 1), blue (adjusted P < 0.05), or red (|Log<sub>2</sub>FC| > 1 and adjusted P < 0.05). Adgb is indicated. (B) Relative mRNA expression levels of 17βhds3 in testes of wildtype (+/+) and knockout mice (-/-) (n=3-4 per genotype) on post-natal day 24. (C) Relative mRNA expression levels of Lhcgr in testes of wildtype (+/+) and knockout mice (-/-) (n=3-4 per genotype) on post-natal day 24. \* p < 0.05.

**Fig.S5**

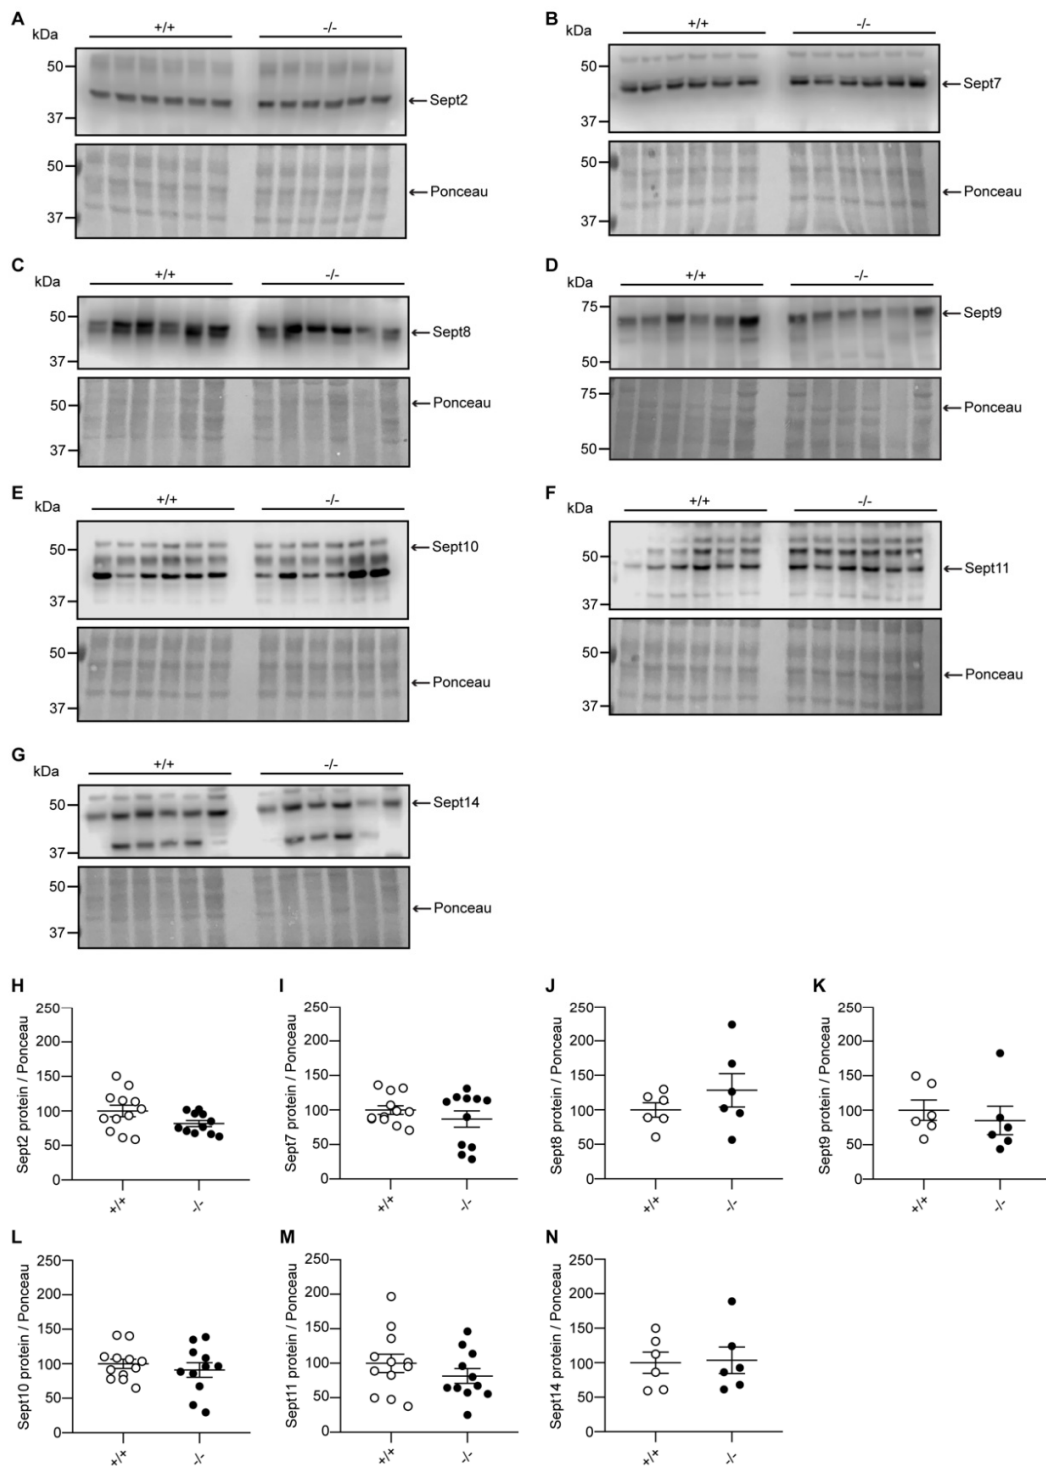

**Figure S5. The protein expression levels of Sept2, 7, 8, 9, 10, 11 and 14 are unaffected in Adgb KO testis. Representative immunoblots of testis lysates from**

Adgb wildtype (+/+, n=6-12) and knockout (-/-, n=6-11) mice for **(A)** Sept2, **(B)** Sept7, **(C)** Sept8, **(D)** Sept9, **(E)** Sept10, **(F)** Sept11, and **(G)** Sept14, and the corresponding protein quantifications for **(H)** Sept2, **(I)** Sept7, **(J)** Sept8, **(K)** Sept9, **(L)** Sept10, **(M)** Sept11, and **(N)** Sept14. Ponceau S protein staining was used as loading control.

**Fig.S6**

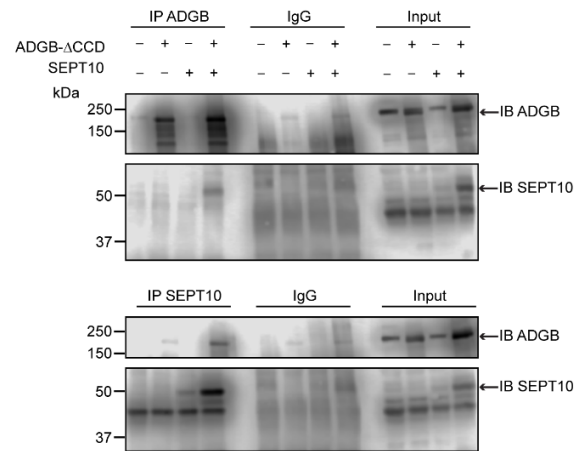

**Figure S6. The interaction between ADGB and SEPT10 is maintained despite mutation of the coiled-coil domains.** Representative immunoblots of ADGB and Sept10 in protein lysates of HEK293 cells (co-)transfected with CCD mutant ADGB and CCD mutant SEPT10 following co-immunoprecipitation of ADGB and SEPT10.

**Fig.S7**

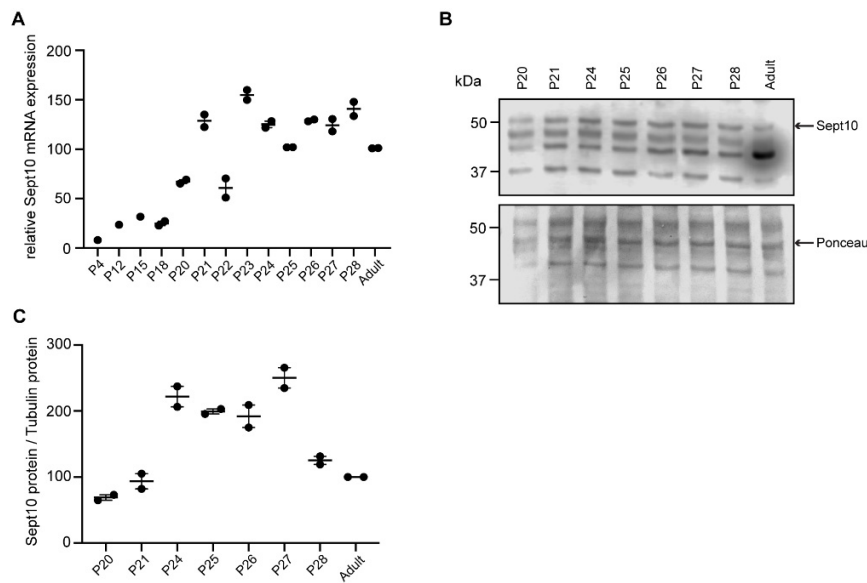

**Figure S7. Sept10 temporal expression profile on mRNA and protein levels. (A)** Relative mRNA expression levels of Sept10 in testes of wildtype mice during the first wave of spermatogenesis at indicated post-natal (P) days. **(B)** Representative immunoblot for Sept10 in testis lysates from wildtype mice at indicated post-natal (P) ages (n=2 per condition) and **(C)** corresponding protein quantification. Ponceau S protein staining was used as loading control.

**Fig.S8**

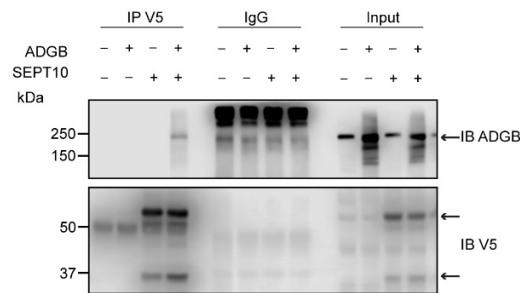

**Figure S8. Reciprocal co-immunoprecipitation (coIP) of ADGB and V5-SEPT10 from Fig 7B.** Representative immunoblot of ADGB and V5 in protein lysates of HEK293 cells (co-)transfected with full-length ADGB and a C-terminally V5-tagged SEPT10 construct following co-immunoprecipitation of ADGB and V5-SEPT10.

**Fig.S9**

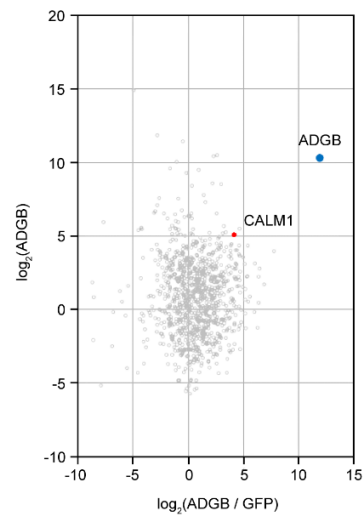

**Figure S9. ADGB globin immunoprecipitation (IP) vs GFP control IP.**

Calmodulin (CALM1) is among the proteins that are prominently enriched in the anti-GFP IP of cells expressing the GFP-tagged globin domain of ADGB. The iBAQ values of the two IPs were  $\log_2$  transformed and normalized against the median value. The normalized abundance of each protein detected in the globin IP ( $\log_2$  globin) of cells expressing the GFP-globin construct is plotted against its specific enrichment compared to the control IP ( $\log_2$  (globin / control)) from cells expressing the GFP-linker-GFP construct. ADGB and CALM1 are highlighted as blue and red dots, respectively, in the christmas tree plot representation.

**Fig.S10**

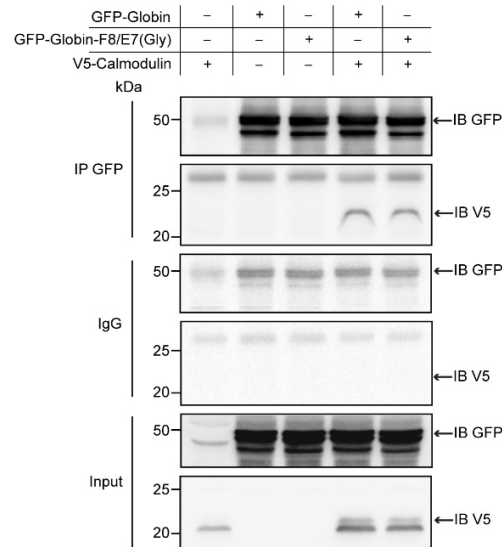

**Figure S10. Double mutation of the key heme-binding residues does not abrogate interaction of ADGB and CaM.** Representative immunoblot of GFP and V5 in protein lysates of HEK293 cells (co-)transfected with GFP-Globin, a GFP-Globin construct with a double mutation of the proximal heme-binding histidine and the distal heme-binding glutamine (GFP-Globin-F8/E7(Gly)) and V5-CaM following immunoprecipitation of GFP.



**Table S1.** List of mouse primers used for RT-qPCR

| <b>Gene</b> | <b>Forward primer 5'-3'</b> | <b>Reverse primer 5'-3'</b> |
|-------------|-----------------------------|-----------------------------|
| Adgb        | TTCCAACAGAAACACATTTTGTCCA   | TCCATTACTATGCTCATTTCCT      |
| NOS1        | CAGGCAAATCCCAAGCCTATG       | CAAAGCACAGCCGAATTTCTC       |
| NOS2        | ATTCACAGCTCATCCGGTACG       | GGATCTTGACCATCAGCTTGC       |
| NOS3        | CATTTTCGGACTCACATTGCG       | TTGGTCAACCGAACGAAGTG        |
| SOD1        | GTGATTGGGATTGCGCAGTA        | TGGTTGAGGGTAGCAGATGAGT      |
| SOD2        | TTAACGCGCAGATCATGCA         | GGTGGCGTTGAGATTGTTCA        |
| SOD3        | CATGCAATCTGCAGGGTACAA       | AGAACCAAGCCGGTGATCTG        |
| Bax         | GCGTGGTTGCCCTCTTCTACTTTG    | AGTCCAGTGTCCAGCCCATGATG     |
| Bcl2        | AAGGGCTTCACACCCAAATCT       | CTTCTACGTCTGCTTGGCTTTGA     |
| Sept10      | GGCCTCATGCGACGAGATAA        | CCAATTCCAGTCTCCCCAC         |
| 17βhsd3     | ATT TTA CCA GAG AAG ACA TCT | GGG GTC AGC ACC TGA ATA ATG |
| Lhcgr       | CGA CGC TAA TCT CGC TGG AG  | CGT AAT CCC AGC CAC TGA GTT |
| Actin       | GAGCGTGGCTACAGCTTCAC        | GGCATAGAGGTCTTTACGGAT G     |

**Table S2.** List of antibodies used throughout the study.

| <b>Antibody</b>         | <b>Reference</b>                                         | <b>Species</b> | <b>Application/dilution</b>  |
|-------------------------|----------------------------------------------------------|----------------|------------------------------|
| anti-mAdgb              | Proteintech, custom made against region 409-745 of mAdgb | Rabbit         | Immunoblot 1/200<br>IF 1/300 |
| anti-hAdgb N-ter        | Atlas Antibodies, HPA036340                              | Rabbit         | Immunoblot 1/500             |
| anti-hAdgb C-ter        | OriGene, TA330746                                        | Rabbit         | Immunoblot 1/500             |
| anti-Sept10             | Proteintech, 12420-1-AP                                  | Rabbit         | Immunoblot 1/500<br>IF 1/300 |
| anti-Sept2              | Proteintech, 60075-1-Ig                                  | Mouse          | Immunoblot 1/500             |
| anti-Sept7              | Proteintech, 13818-1-AP                                  | Rabbit         | Immunoblot 1/500             |
| anti-Sept8              | Proteintech, 11769-1-AP                                  | Rabbit         | Immunoblot 1/500             |
| anti-Sept9              | Proteintech, 10769-1-AP                                  | Rabbit         | Immunoblot 1/500             |
| anti-Sept11             | Proteintech, 14672-1-AP                                  | Rabbit         | Immunoblot 1/500             |
| anti-Sept14             | Proteintech, 24590-1-AP                                  | Rabbit         | Immunoblot 1/500             |
| anti-GFP                | Proteintech, 50430-2-AP                                  | Rabbit         | Immunoblot 1/1000            |
| anti-V5                 | Invitrogen, 46-0705                                      | Mouse          | Immunoblot 1/1000            |
| anti-CoxIV              | Abcam, ab14744                                           | Rabbit         | IF 1/300                     |
| anti-HIF-1 $\alpha$     | BD Transduction laboratories, 610958                     | Mouse          | Immunoblot 1/500             |
| anti-PHD2               | Novus Biologicals, NB100-137                             | Rabbit         | Immunoblot 1/1000            |
| anti- $\alpha$ -tubulin | Santa Cruz, TU-02                                        | Mouse          | Immunoblot 1/1000            |

## **Datasets**

**Dataset S1.** Differentially regulated genes in wild-type versus Adgb knockout testes. Genes with a significant >2-fold induction or reduction are displayed.

**Dataset S2.** Raw MS data of the Adgb IP vs IgG control IP.

**Dataset S3.** Raw MS data of the ADGB globin IP vs GFP control IP.

## SI references

- Green, Christopher Daniel, Qianyi Ma, Gabriel L. Manske, Adrienne Niederriter Shami, Xianing Zheng, Simone Marini, Lindsay Moritz, Caleb Sultan, Stephen J. Gurczynski, Bethany B. Moore, Michelle D. Tallquist, Jun Z. Li, and Saher Sue Hammoud. 2018. "A Comprehensive Roadmap of Murine Spermatogenesis Defined by Single-Cell RNA-Seq." *Developmental Cell* 46 (5):651-667.e10. doi: 10.1016/j.devcel.2018.07.025.
- Jégou, B., S. Sankararaman, A. D. Rolland, D. Reich, and F. Chalmel. 2017. "Meiotic Genes Are Enriched in Regions of Reduced Archaic Ancestry." *Molecular Biology and Evolution* 34 (8):1974-1980. doi: 10.1093/molbev/msx141.
- Lukassen, S., E. Bosch, A. B. Ekici, and A. Winterpacht. 2018. "Characterization of germ cell differentiation in the male mouse through single-cell RNA sequencing." *Scientific Reports* 8 (1). doi: 10.1038/s41598-018-24725-0.
- Wang, Mei, Xixi Liu, Gang Chang, Yidong Chen, Geng An, Liying Yan, Shuai Gao, Yanwen Xu, Yueli Cui, Ji Dong, Yuhan Chen, Xiaoying Fan, Yuqiong Hu, Ke Song, Xiaohui Zhu, Yun Gao, Zhaokai Yao, Shuhui Bian, Yu Hou, Jiahao Lu, Rui Wang, Yong Fan, Ying Lian, Wenhao Tang, Yapeng Wang, Jianqiao Liu, Lianming Zhao, Luyu Wang, Zhaoting Liu, Renpei Yuan, Yujia Shi, Boqiang Hu, Xiulian Ren, Fuchou Tang, Xiao-Yang Zhao, and Jie Qiao. 2018. "Single-Cell RNA Sequencing Analysis Reveals Sequential Cell Fate Transition during Human Spermatogenesis." *Cell Stem Cell* 23 (4):599-614. doi: 10.1016/j.stem.2018.08.007.

## **Source data files**

**Source data files Figure 1.** Full uncropped immunoblots for Adgb and tubulin.

**Source data files Figure 2.** Full uncropped immunoblots for Adgb and tubulin.

**Source data files Figure 4B and 4C.** Full uncropped immunoblots for Adgb and Sept10.

**Source data files Figure 4D.** Full uncropped immunoblots for ADGB and SEPT10.

**Source data files Figure 4E.** Full uncropped immunoblots for ADGB and SEPT10.

**Source data files Figure 6A and 6B.** Full uncropped immunoblots for ADGB, V5 and SEPT10.

**Source data files Figure 6C and 6D.** Full uncropped immunoblots for ADGB, PHD2, HIF-1 $\alpha$  and V5.

**Source data files Figure 6E.** Full uncropped immunoblots for GFP and V5.

**Source data files Figure 6F.** Full uncropped immunoblots for GFP and V5.

**Source data files Figure S1.** Full uncropped DNA gels and southern blot.

**Source data files Figure S5A, B, C.** Full uncropped immunoblots for Sept2, Sept7, Sept8 and Ponceau S staining.

**Source data files Figure S5D, E, F.** Full uncropped immunoblots for Sept9, Sept10, Sept11 and Ponceau S staining.

**Source data files Figure S5G.** Full uncropped immunoblots for Sept14 and Ponceau S staining.

**Source data files Figure S6.** Full uncropped immunoblots for ADGB and SEPT10.

**Source data files Figure S7B.** Full uncropped immunoblots for Sept10 and Ponceau S staining.

**Source data files Figure S8.** Full uncropped immunoblots for ADGB and V5.

**Source data files Figure S10.** Full uncropped immunoblots for GFP and V5.

## Source files Fig. 1B

Adgb

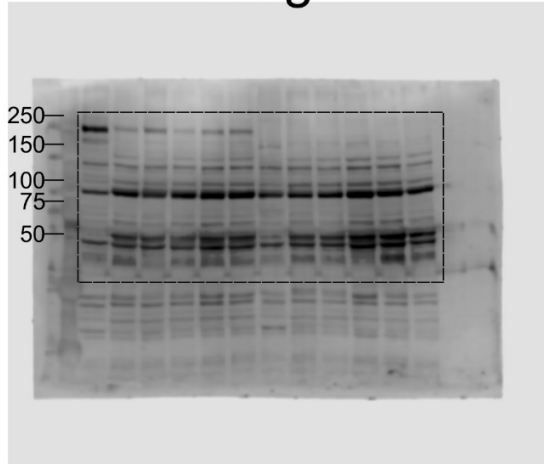

Tubulin

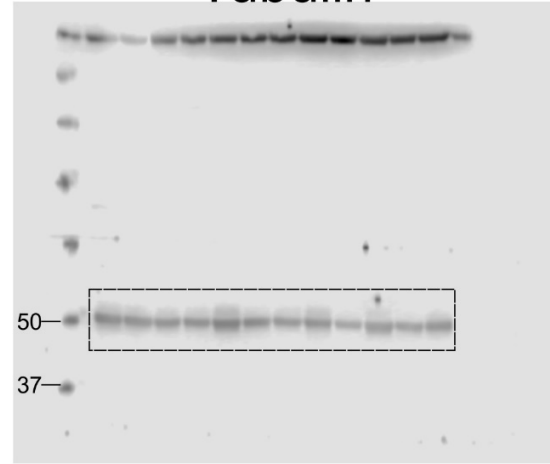

## Source files Fig. 2B

### Adgb

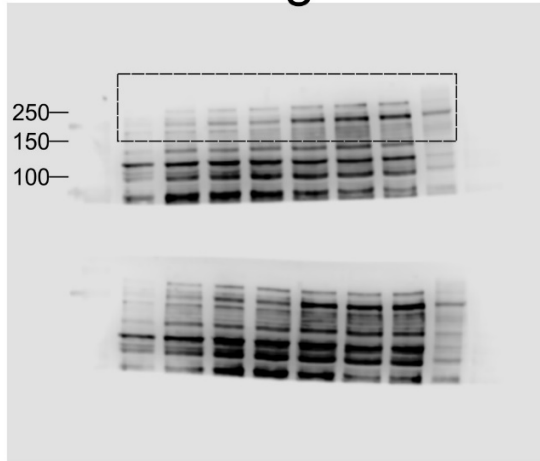

### Tubulin

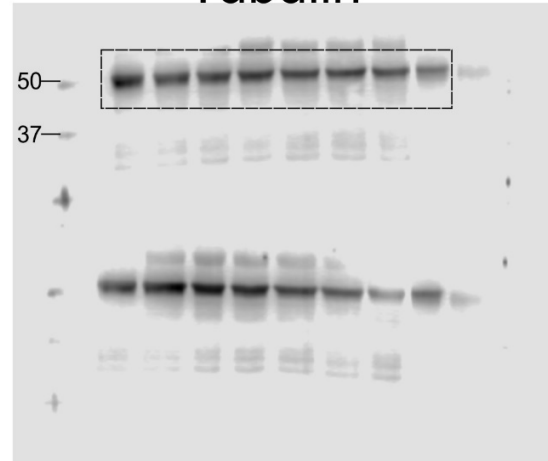

## Source file for Fig. 4B

Adgb

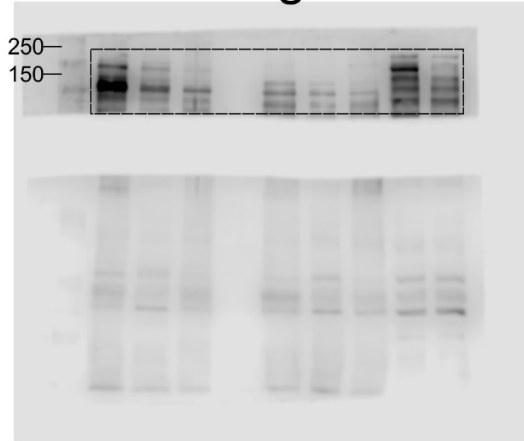

Sept10

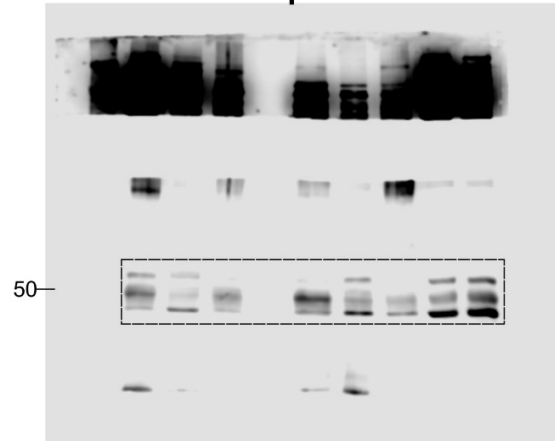

## Fig. 4C

IP Adgb IB Adgb

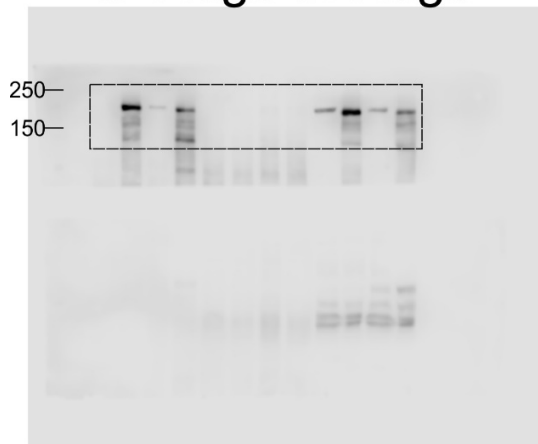

IP Adgb IB Sept10

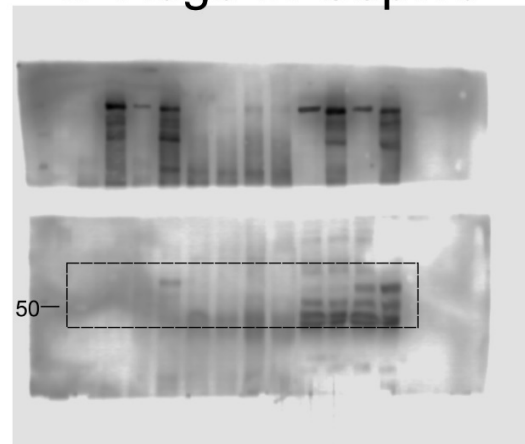

## Fig. 4C

IP Sept10 IB Adgb

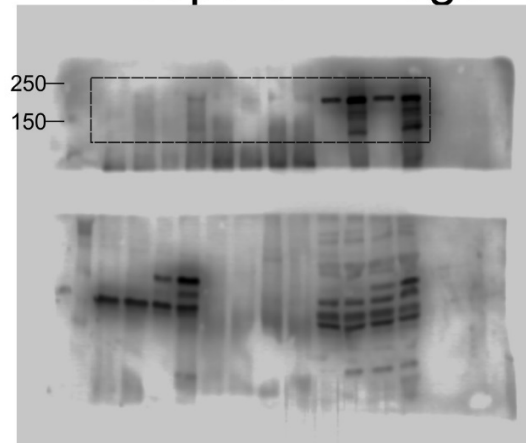

IP Sept10 IB Sept10

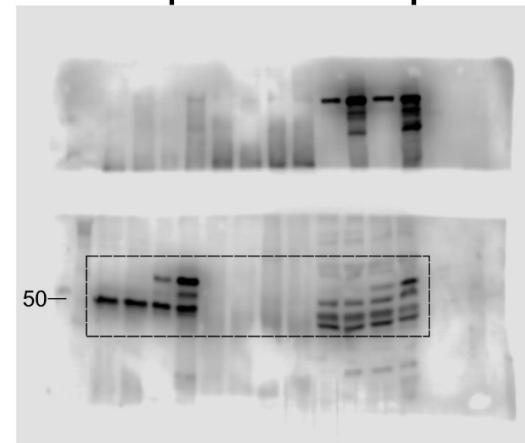



## Source files for Fig. 4D

IP ADGB IB ADGB

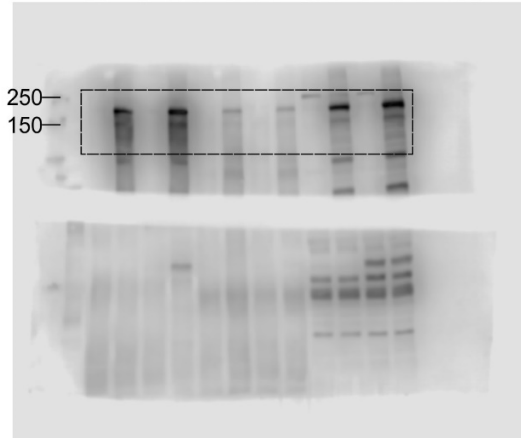

IP ADGB IB SEPT10

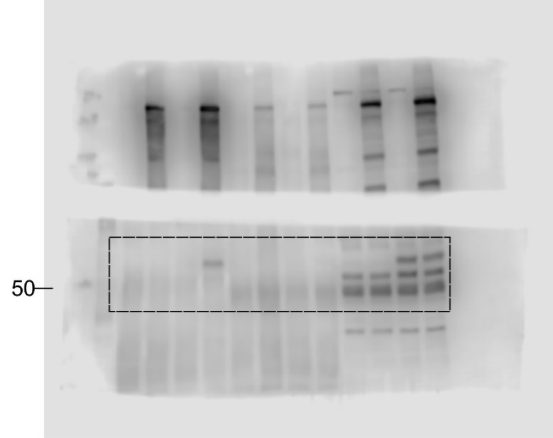

## Fig. 4D

IP SEPT10 IB ADGB

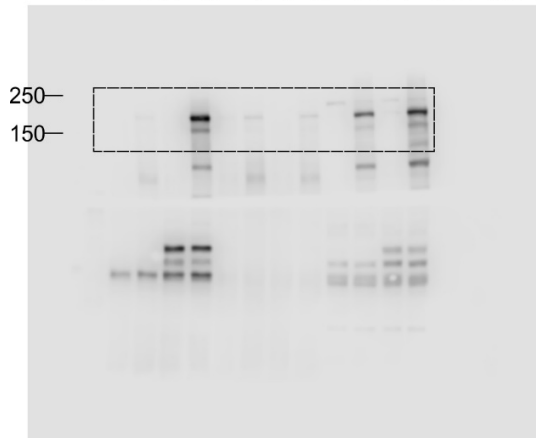

IP SEPT10 IB SEPT10

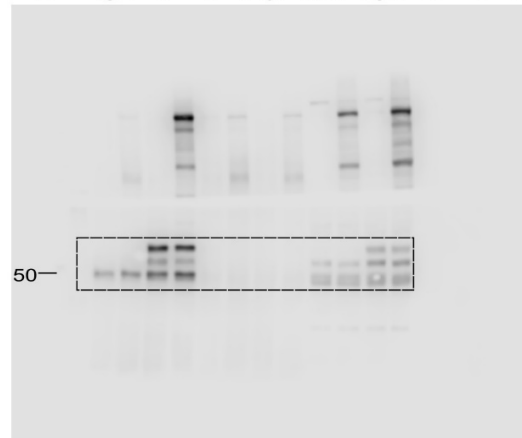

Source files for Fig. 4E  
IP ADGB IB ADGB

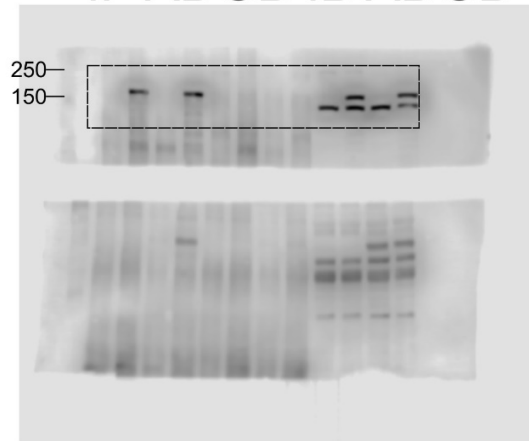

IP ADGB IB SEPT10

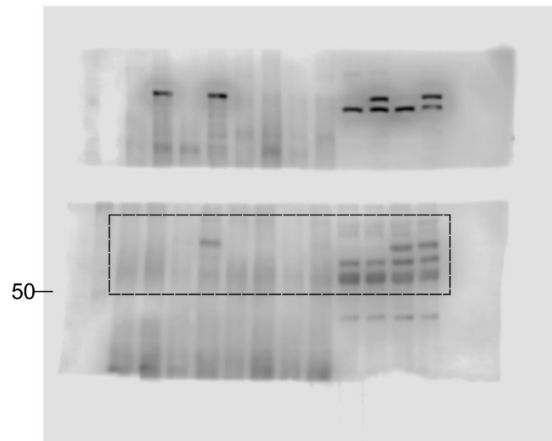

Fig. 4E

IP SEPT10 IB ADGB

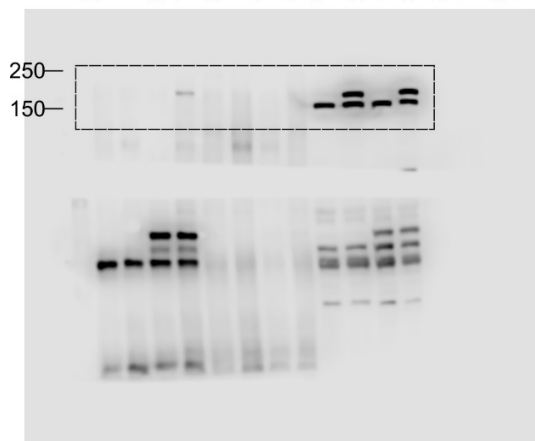

IP SEPT10 IB SEPT10

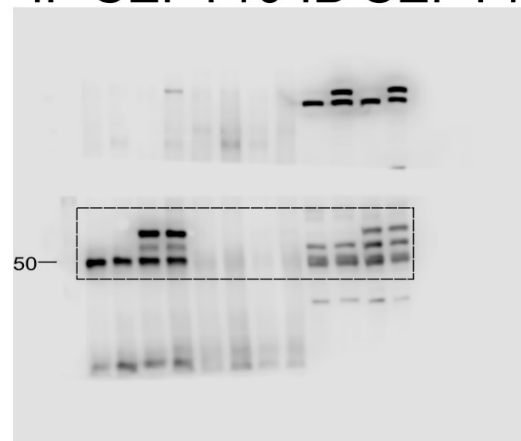

## Source files for Fig. 6A

### ADGB

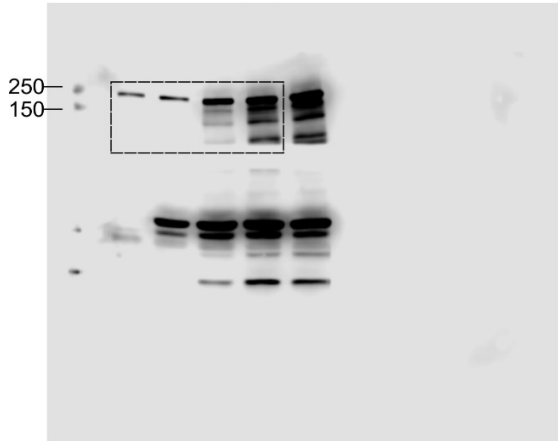

### Sept10

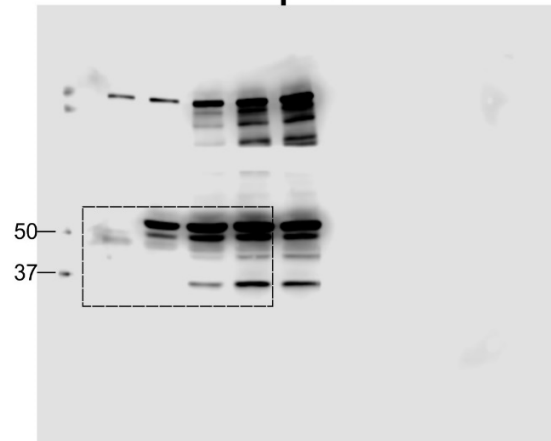

## Fig. 6B

### IP ADGB IB ADGB

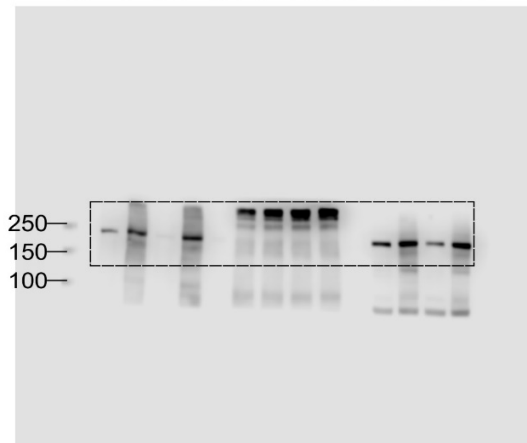

### IP ADGB IB V5

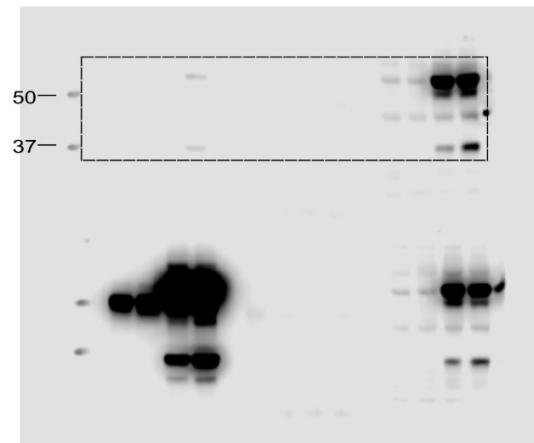

## Source files for Fig. 6C

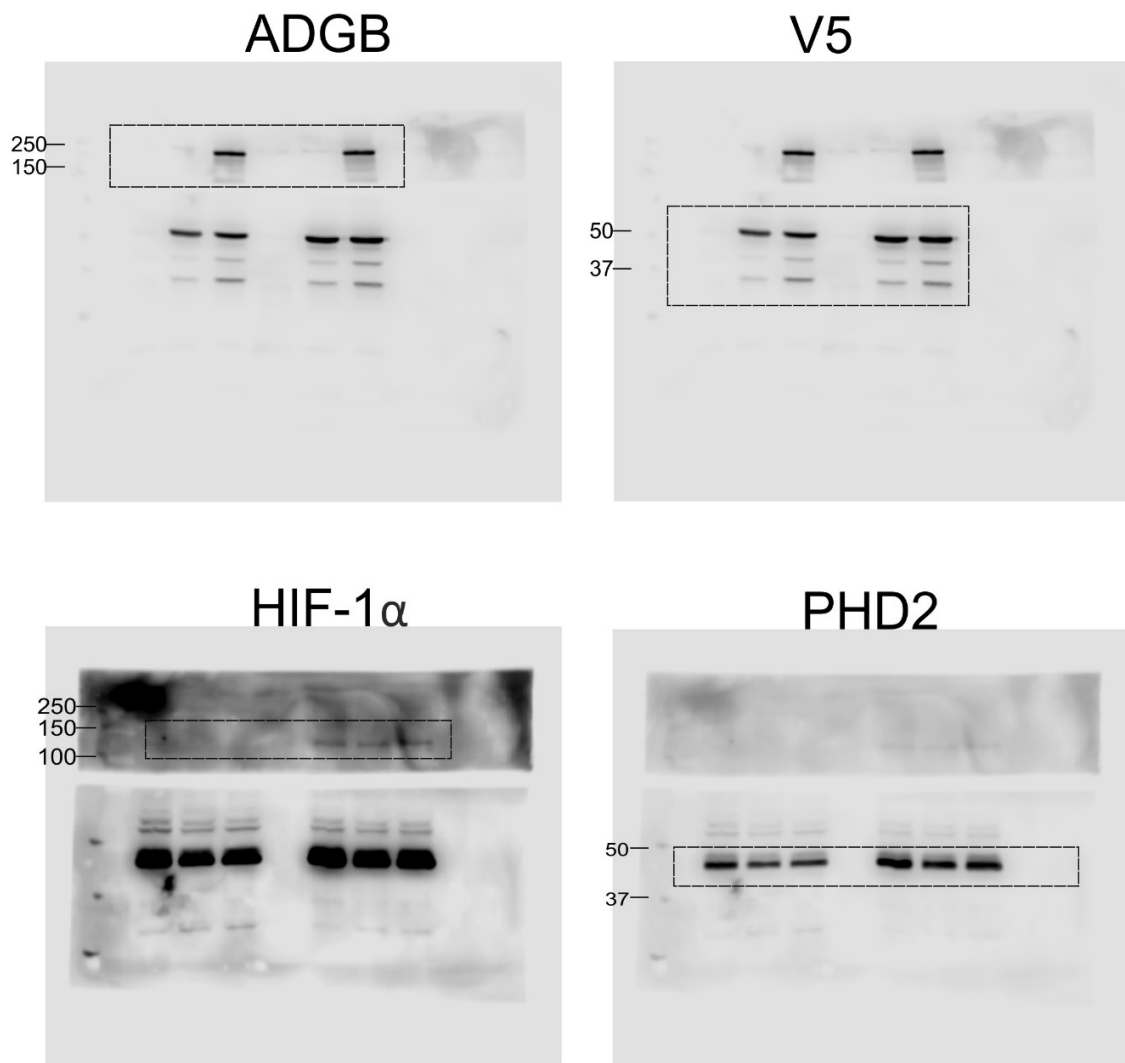

## Fig. 6D

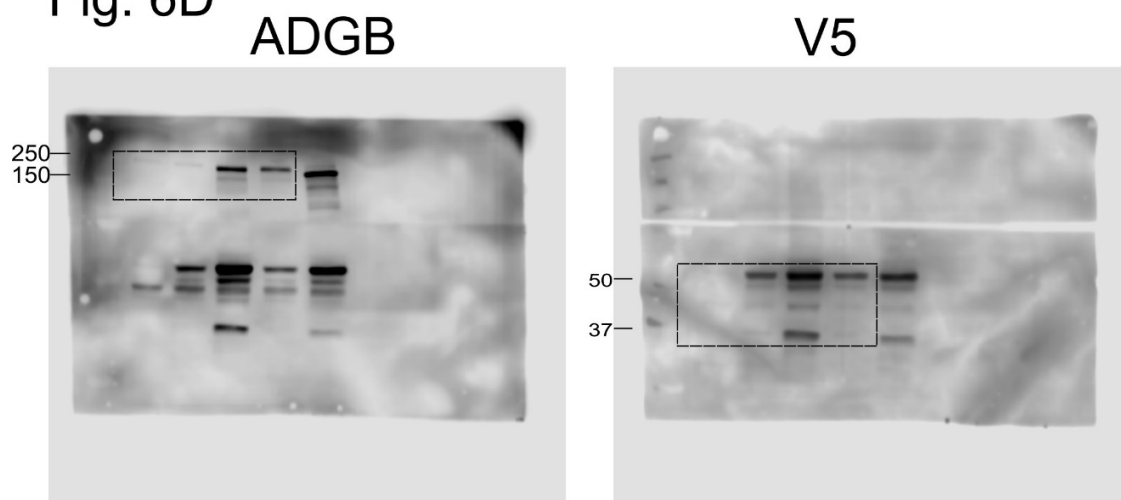

## Source files for Fig. 6E

GFP

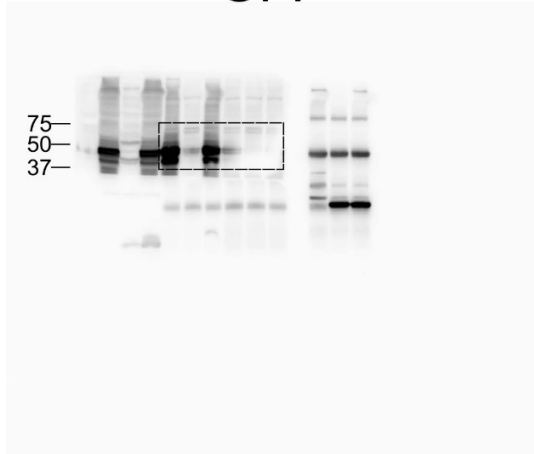

V5

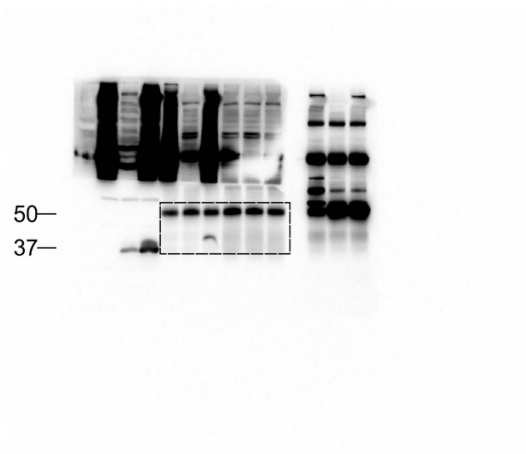

GFP

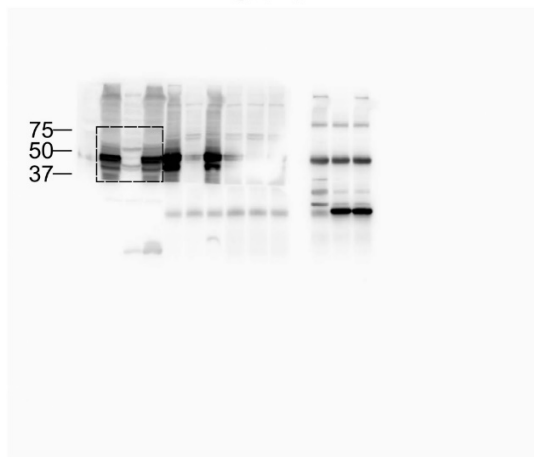

V5

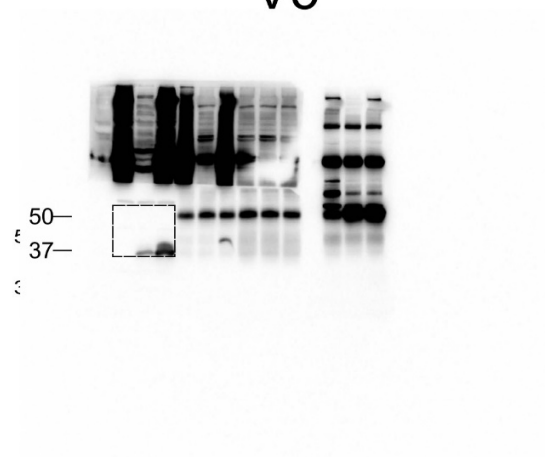

## Source files for Fig. 6F

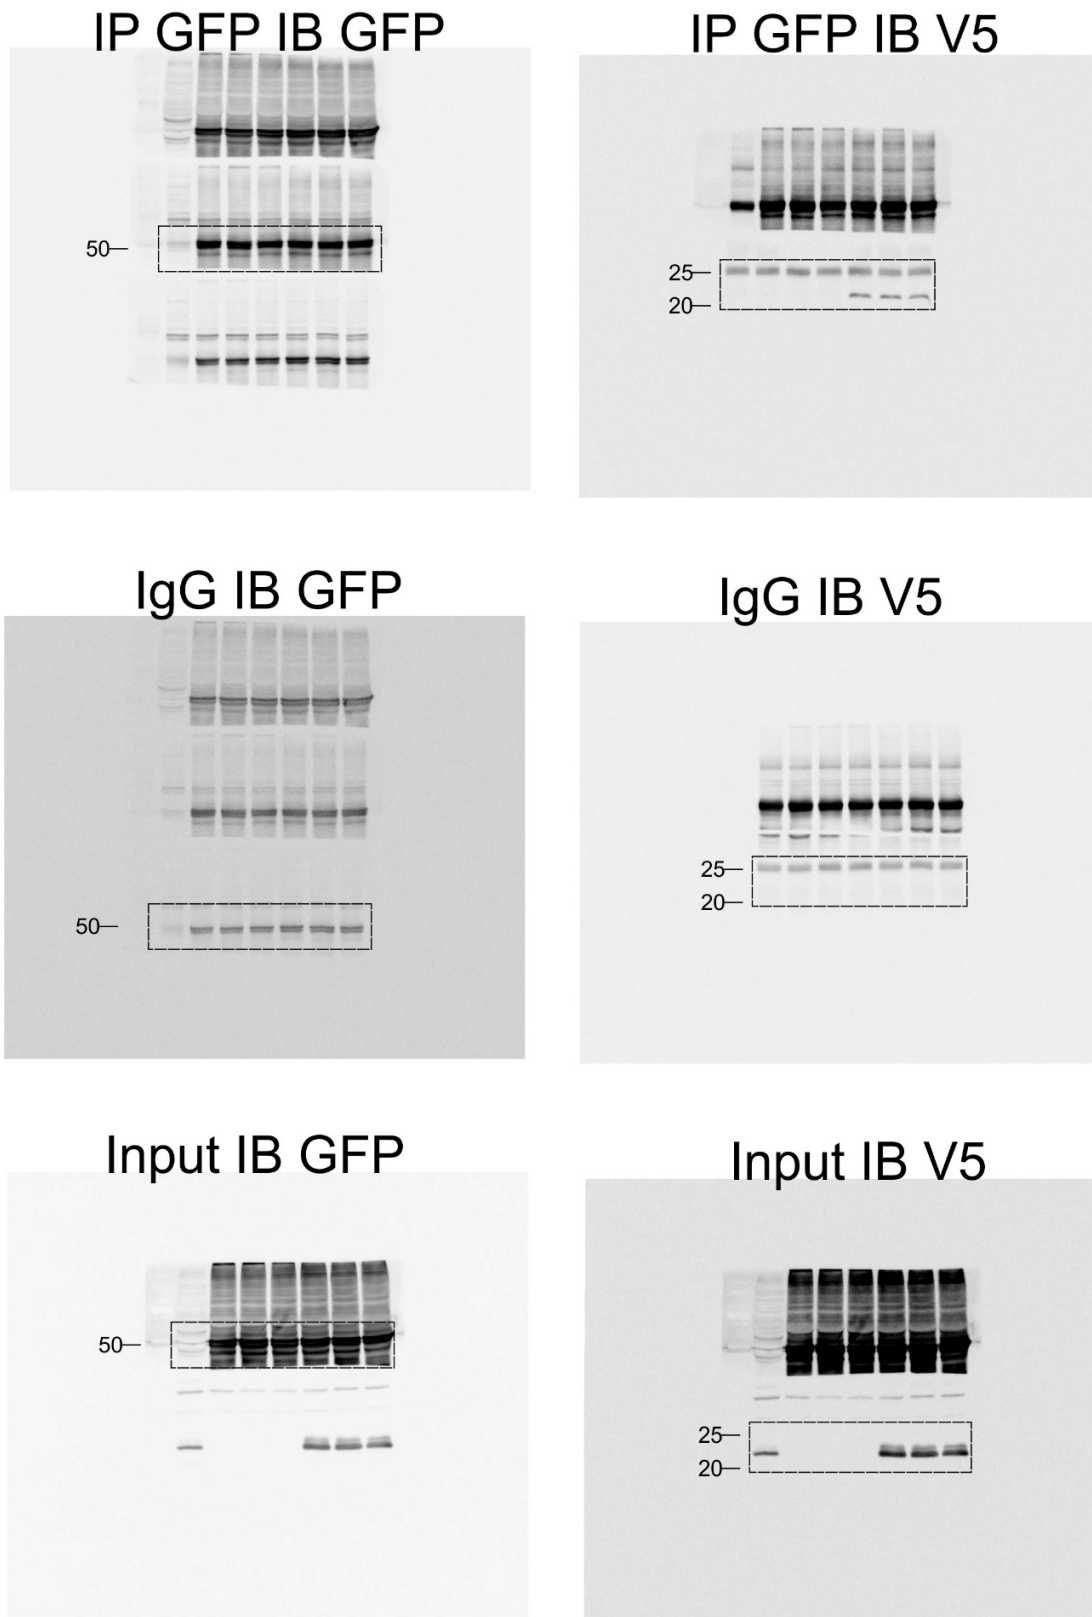

## Source files for Fig. S1

### Fig. S1B

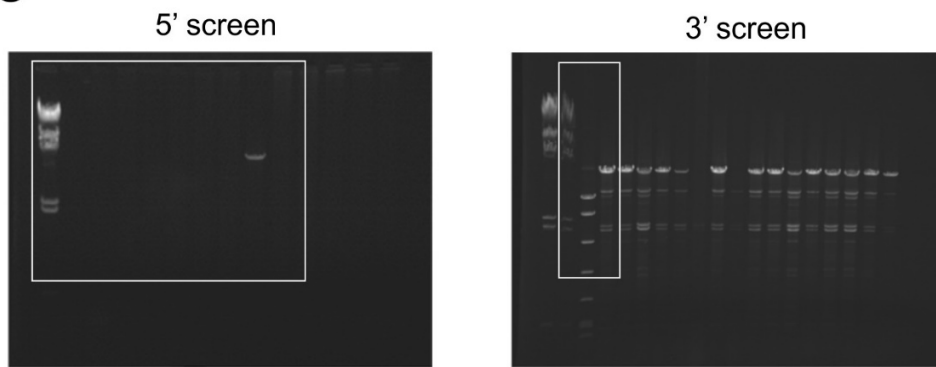

### Fig. S1C

Southern blot

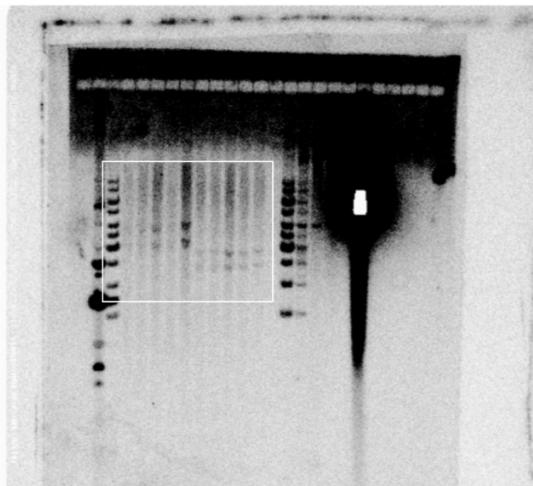

### Fig. S1D

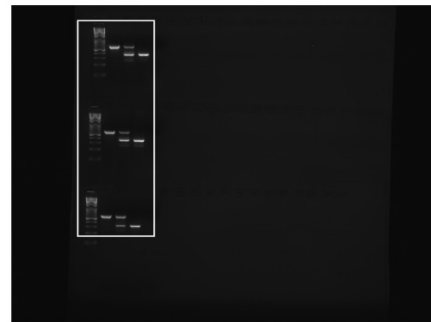

## Source files for Fig. S5 A

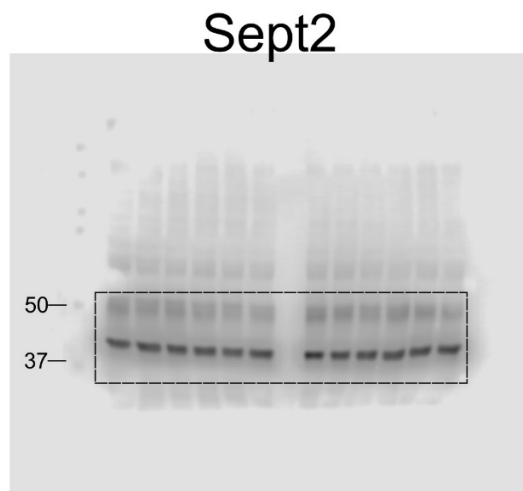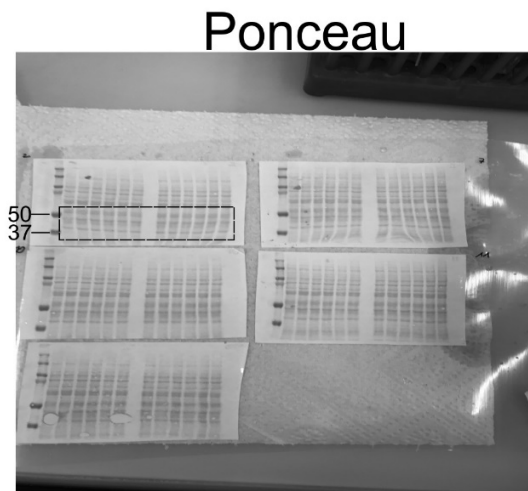

## Fig. S5 B Sept7

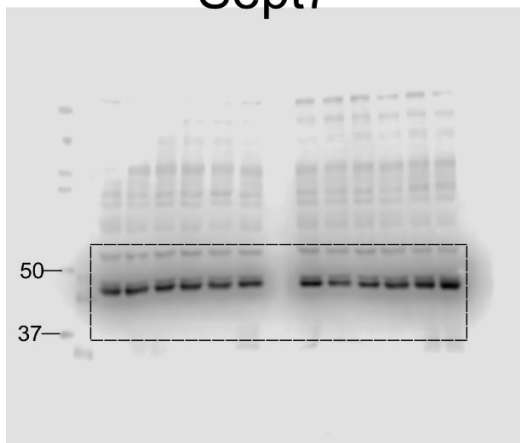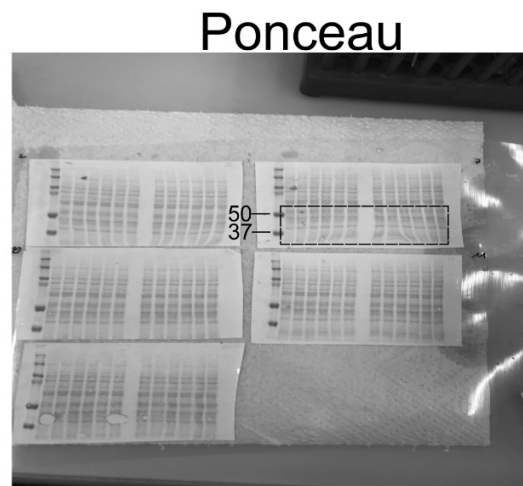

## Fig. S5 C Sept8

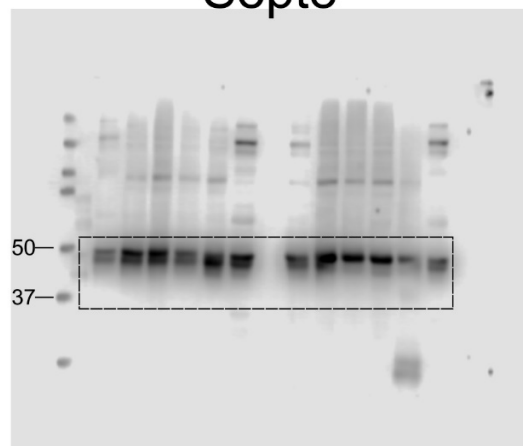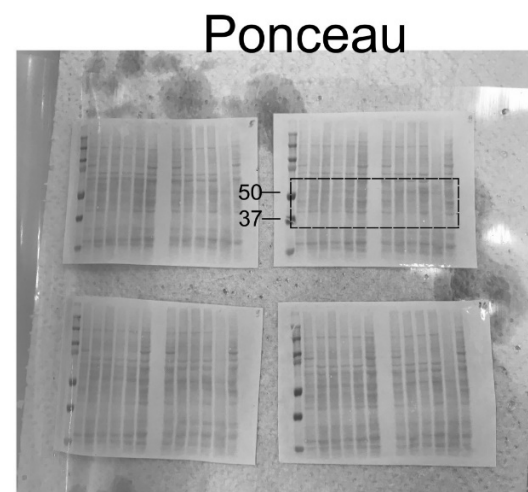



## Source files for Fig. S5 D

Sept9

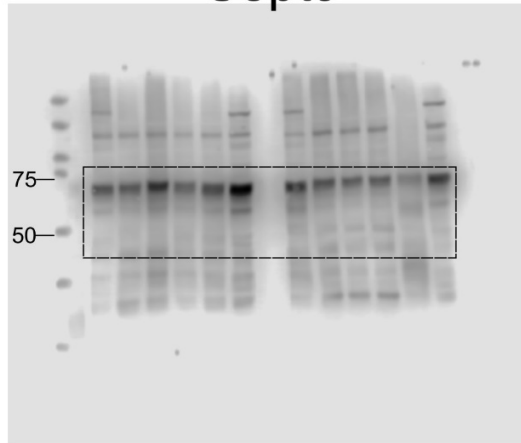

Ponceau

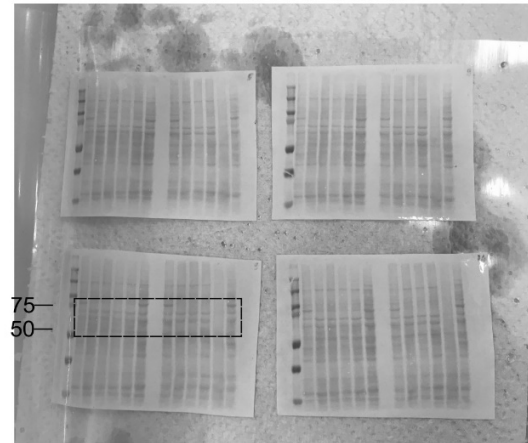

## Fig. S5 E

Sept10

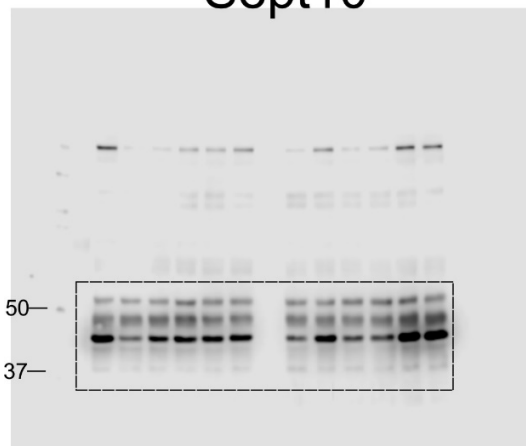

Ponceau

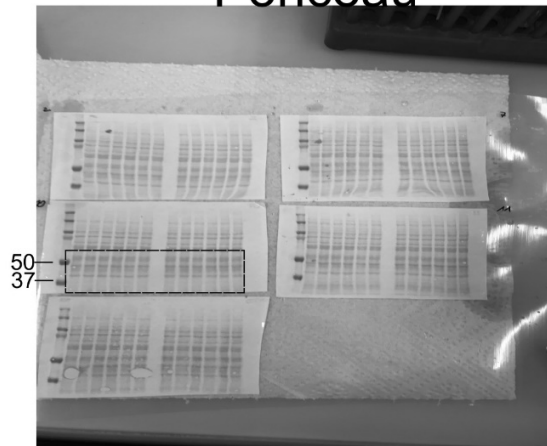

## Fig. S5 F

Sept11

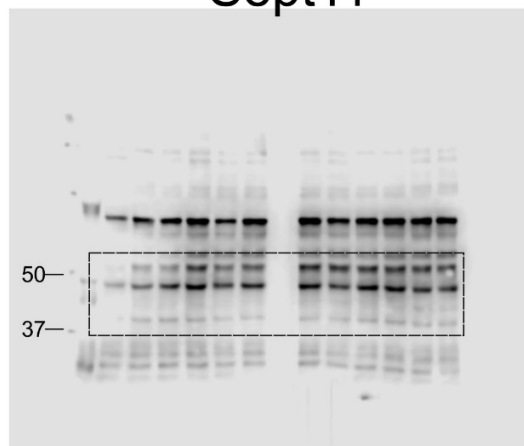

Ponceau

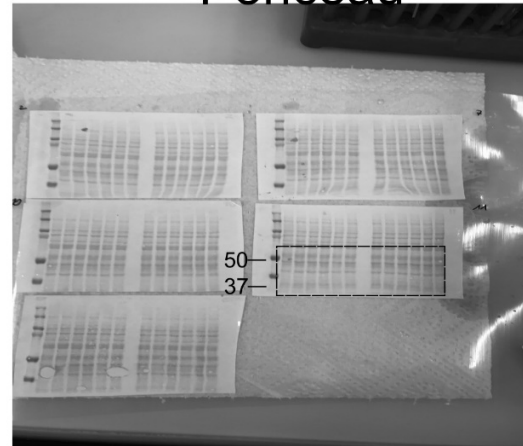

## Source file for Fig. S5 G

Sept14

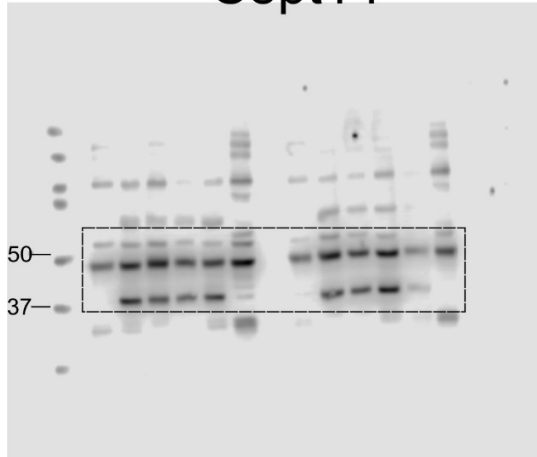

Ponceau

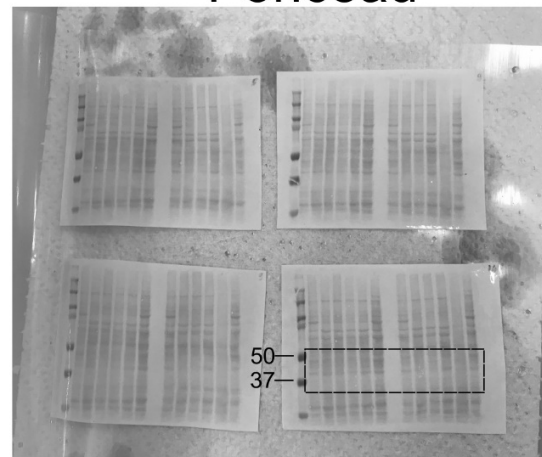

## Source files for Fig. S6

IP ADGB IB ADGB

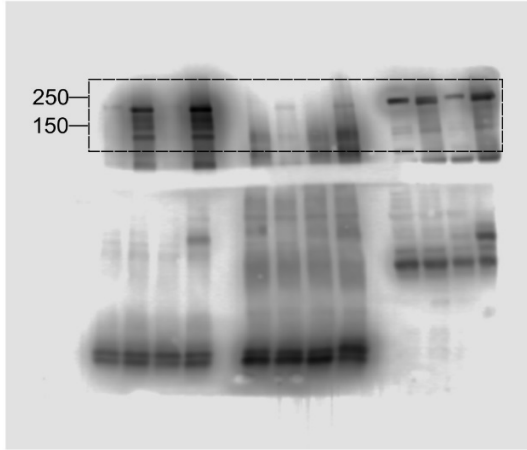

IP ADGB IB SEPT10

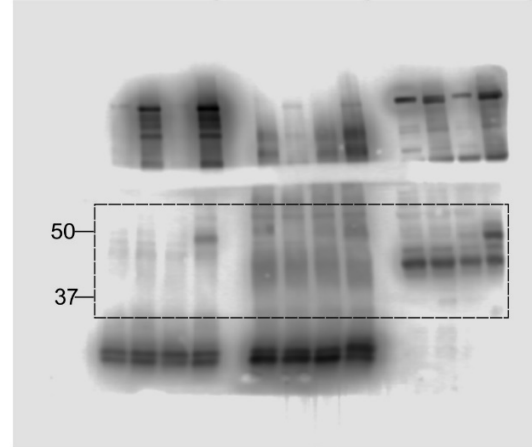

## Fig. S6

IP SEPT10 IB ADGB

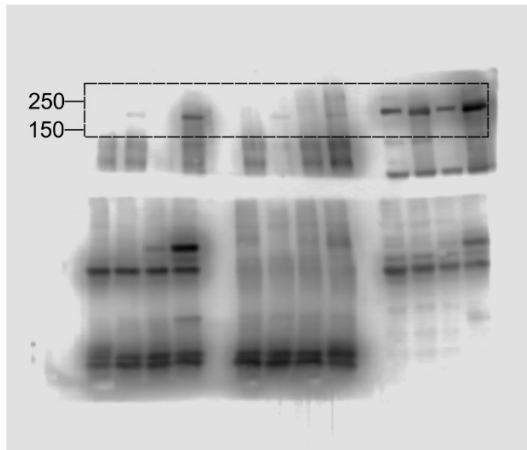

IP SEPT10 IB SEPT10

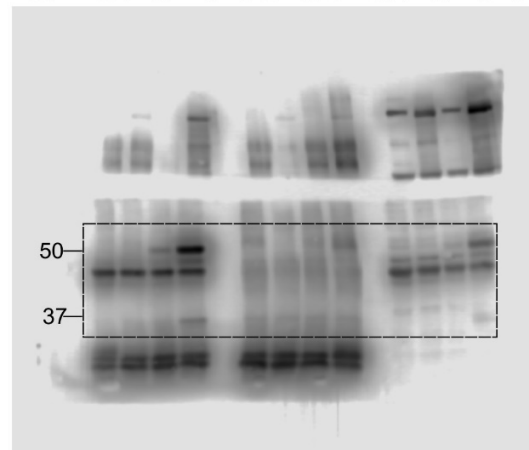

## Source file for Fig. S7B

Sept10

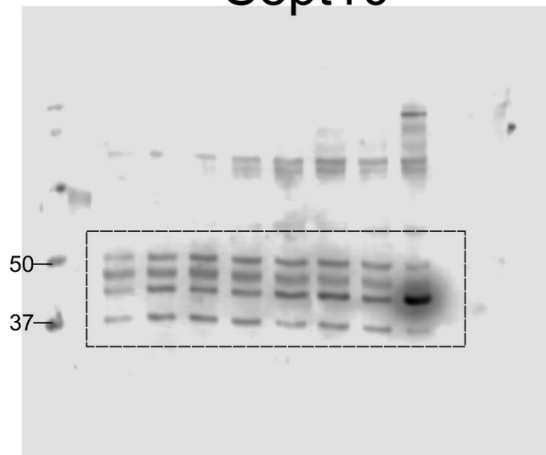

Ponceau

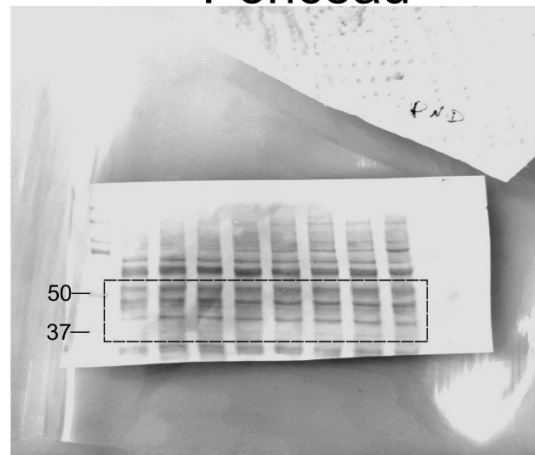

## Source file for Fig. S8

IP ADGB IB ADGB

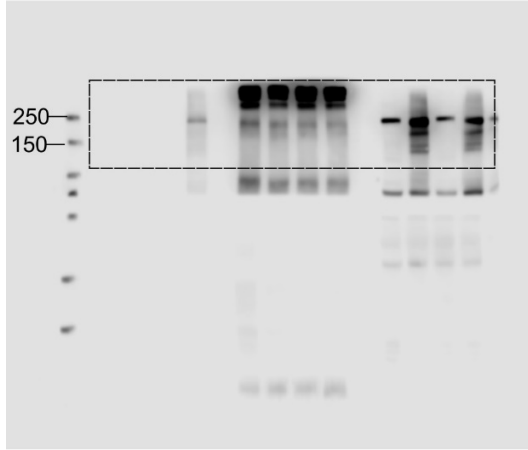

IP ADGB IB V5

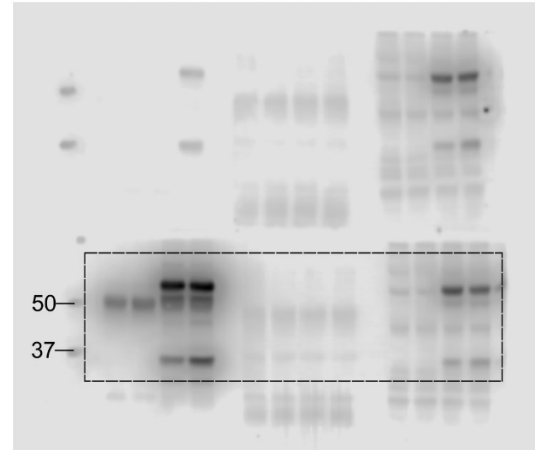

## Source files for Fig. S10

Input IB GFP

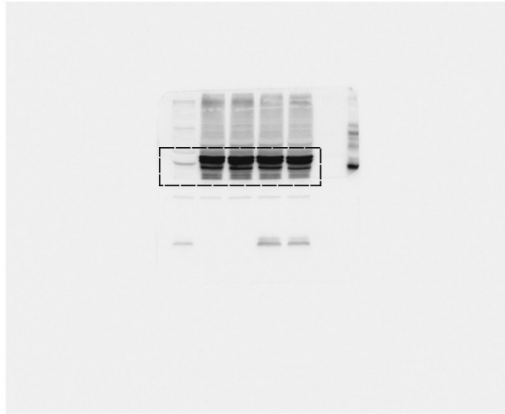

Input IB V5

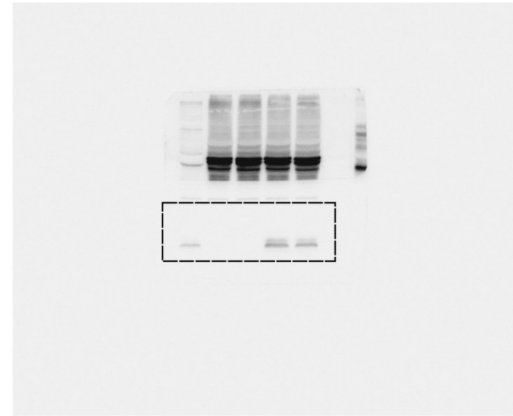

IP GFP IB GFP

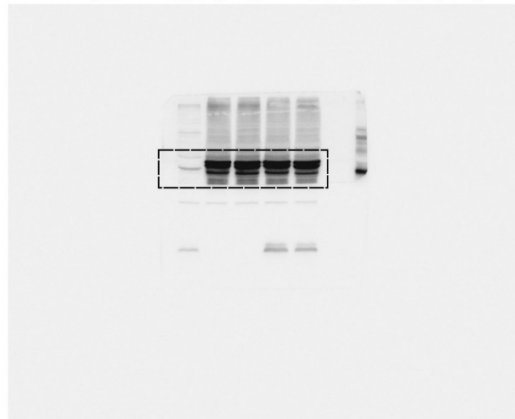

IP GFP IB V5

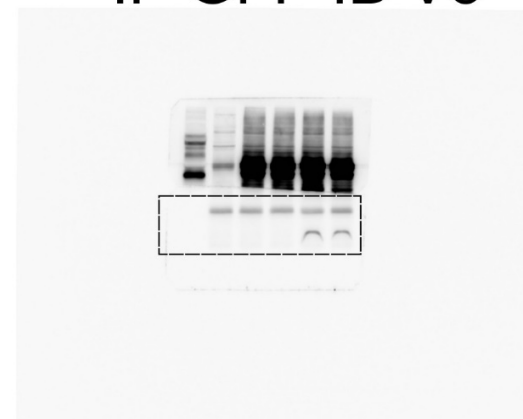

IgG IB GFP

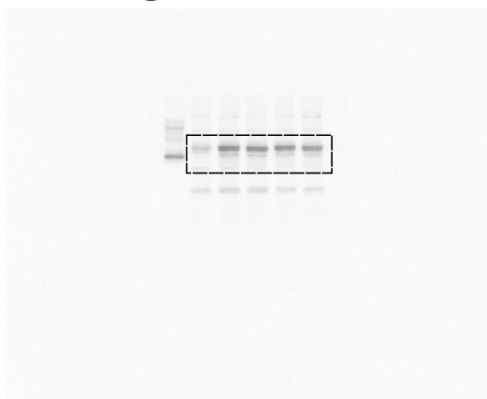

IgG IB V5

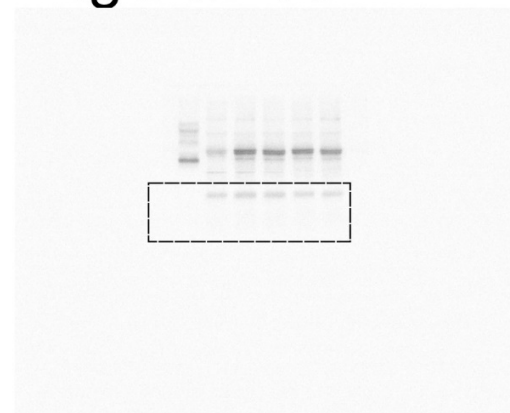

Source: http://biorxiv.org/content/10.1101/2021.09.16.460596v1.full.pdf
